# Supplementary material for: Enterotypes of the human gut microbiome
Source: Springer Nature journal article supplement (doi:10.1038/nature09944), 2011-04-19
Supplement: 41586_2011_BFnature09944_MOESM244_ESM.pdf [file 41586_2011_BFnature09944_MOESM244_ESM.pdf]

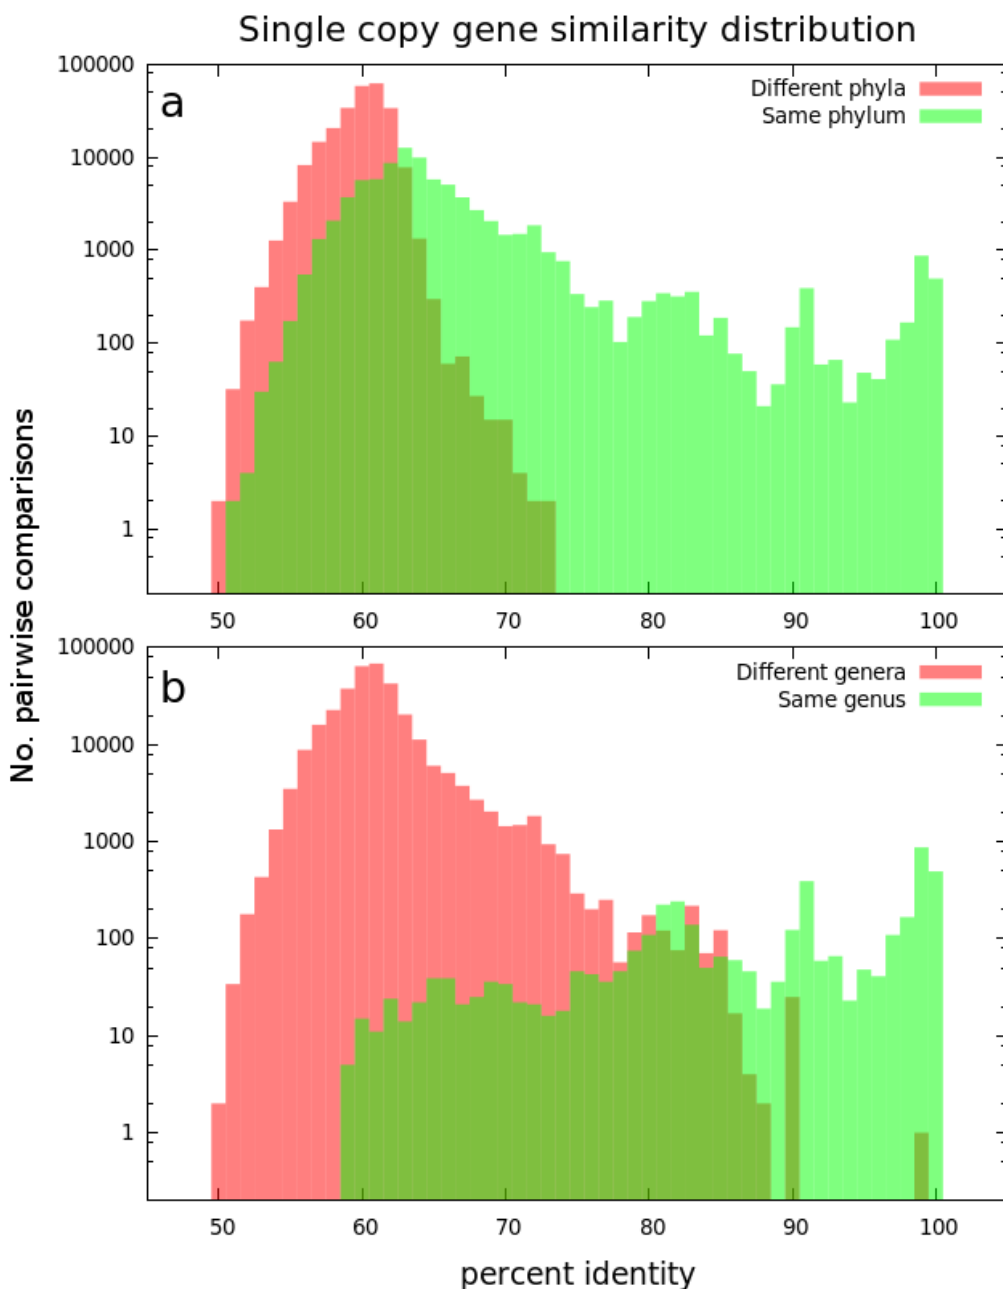

**Supplementary Figure 1.** Establishing DNA sequence similarity thresholds for phylum and genus levels

Sequence similarity distributions of pairwise alignments of 40 universal single copy genes from 835 microbial genomes reveal that (a) 65% DNA sequence similarity threshold accurately groups genomes within the same phylum (with 31.1% sensitivity and 0.77% false positive rate) and (b) 85% threshold accurately groups genomes within the same genera (with 63.23% sensitivity and 5.1% false positive rate). Pairwise comparisons of genomes within the same phylum (genus) are colored green and different phyla (genera) are colored red.

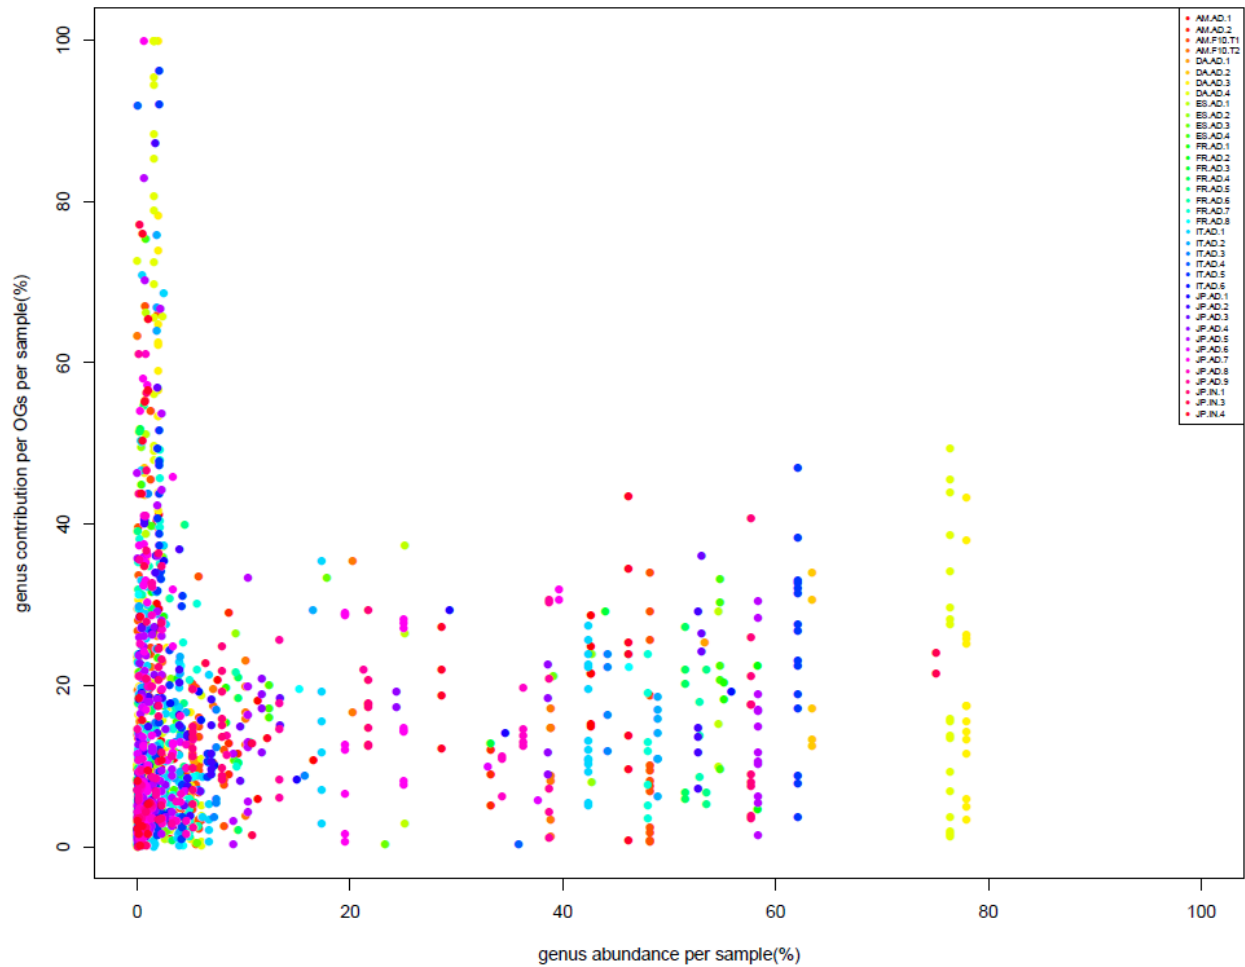

**Supplementary Figure 2. Correlation between the abundance of a genus in the sample and its contribution to an abundant (top 20 percentile) orthologous group. Few functions (on the top left) are almost entirely contributed by genera that are low abundant in the samples.**

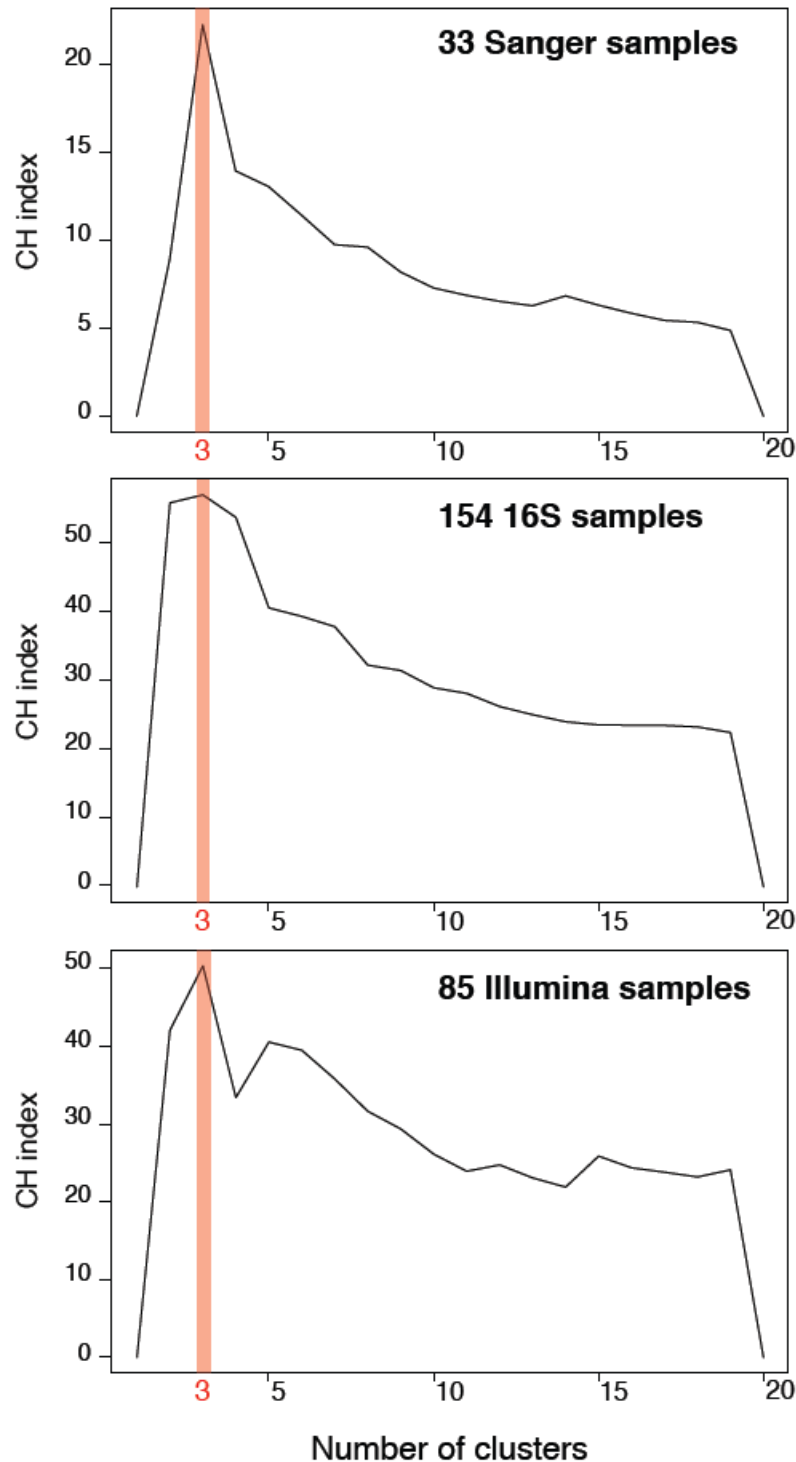

**Supplementary Figure 3. Estimating the number of clusters in the gut metagenome datasets.**

Calinski-Harabasz (CH) index predicts 3 clusters each for (a) Sanger-based metagenome, (b) pyrosequencing-based 16S and (c) Illumina-based metagenome datasets. For details on how the CH index is calculated see Supplementary Methods Section 7.3.

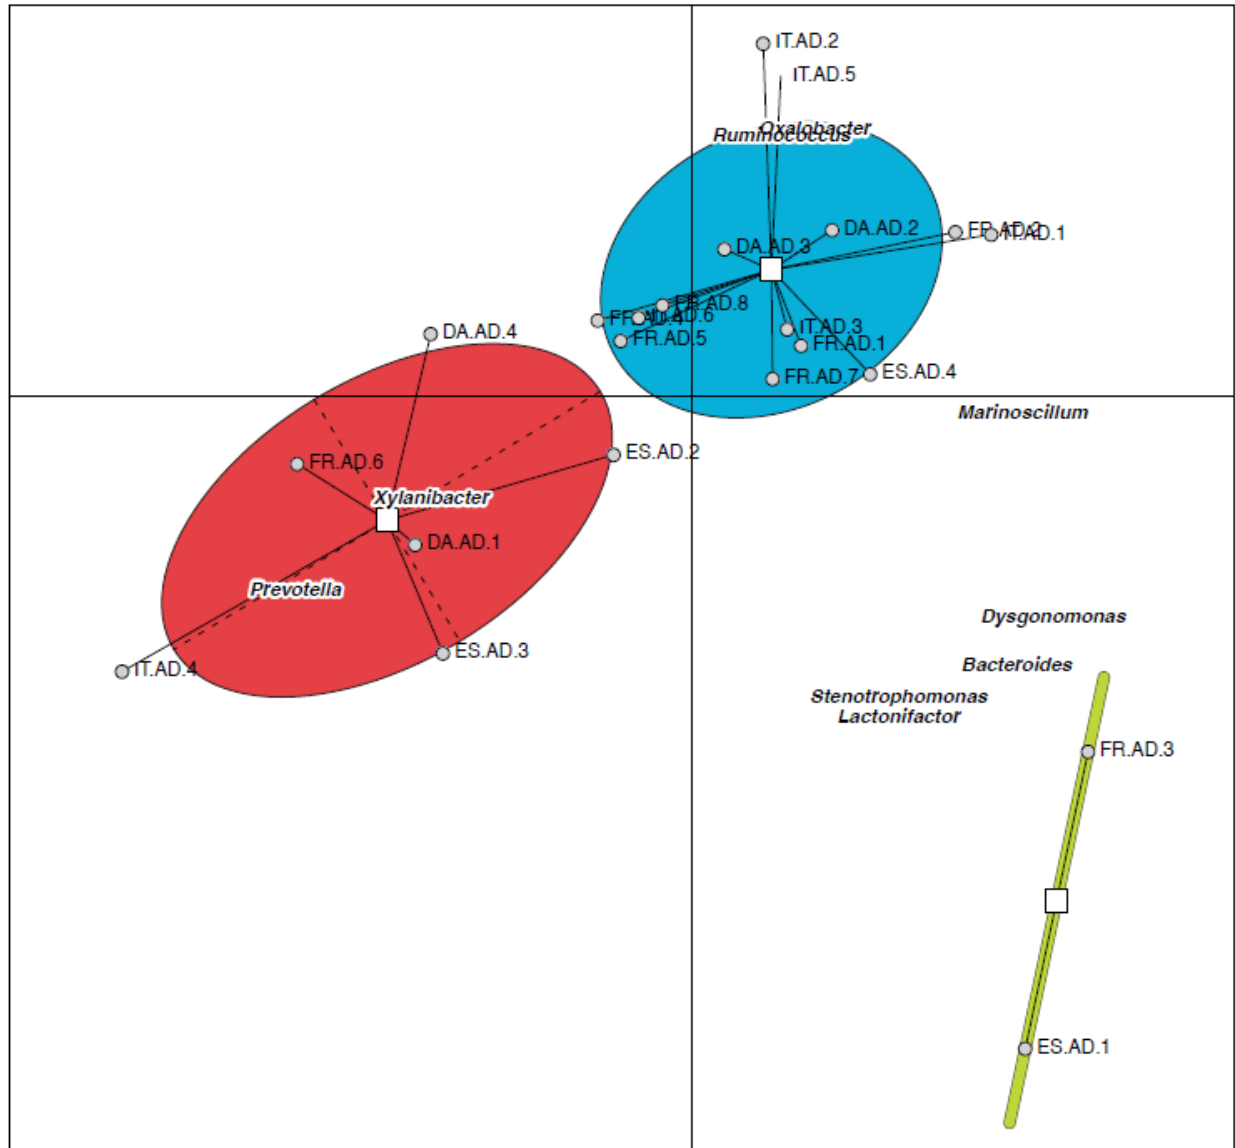

**Supplementary Figure 4.** Between class analysis of enterotype clusters on the HITChip data from 22 European individuals reveals the same drivers.

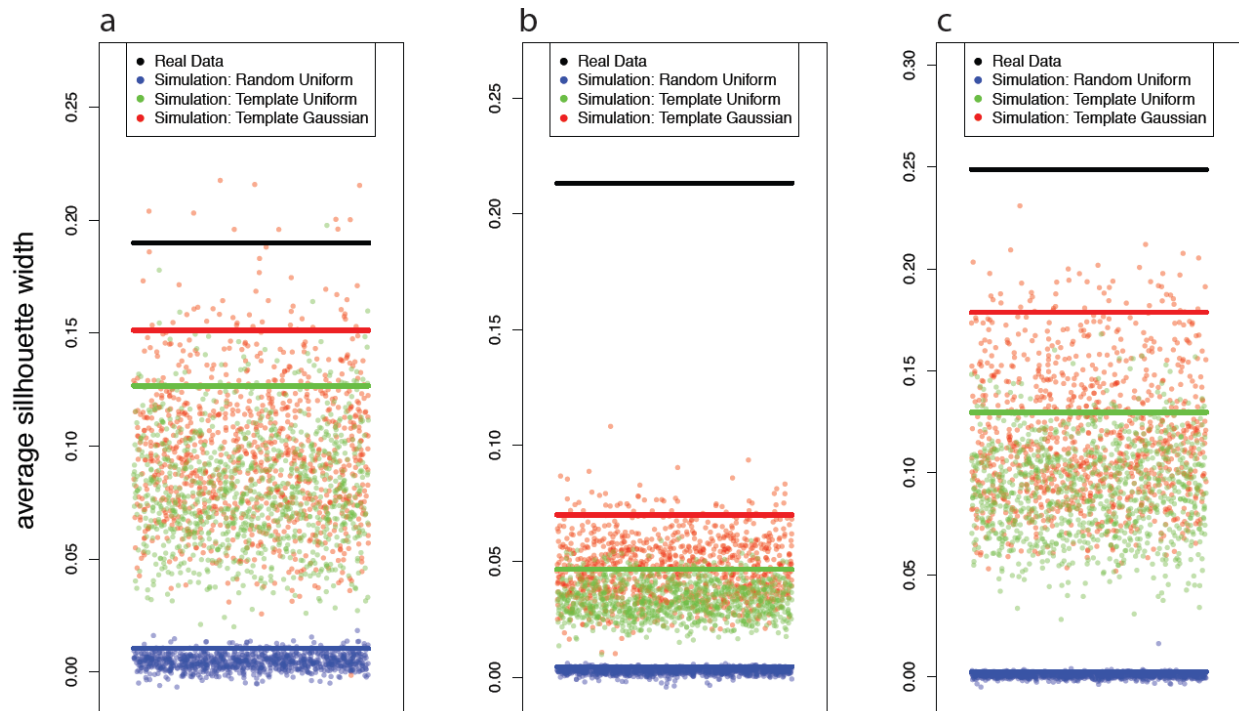

**Supplementary Figure 5. Assessing the robustness of clusters.**

Clustering of real data (black bar) is more robust than three kinds of simulations (colored dots) based on silhouette coefficient for (a) Sanger-based metagenome, (b) pyrosequencing-based 16S and (c) Illumina-based metagenome datasets. See Supplementary Methods Sections 7.4 and 8 for details. Colored bars represent the 95% confidence intervals. P-values are listed in Supplementary Table 24.

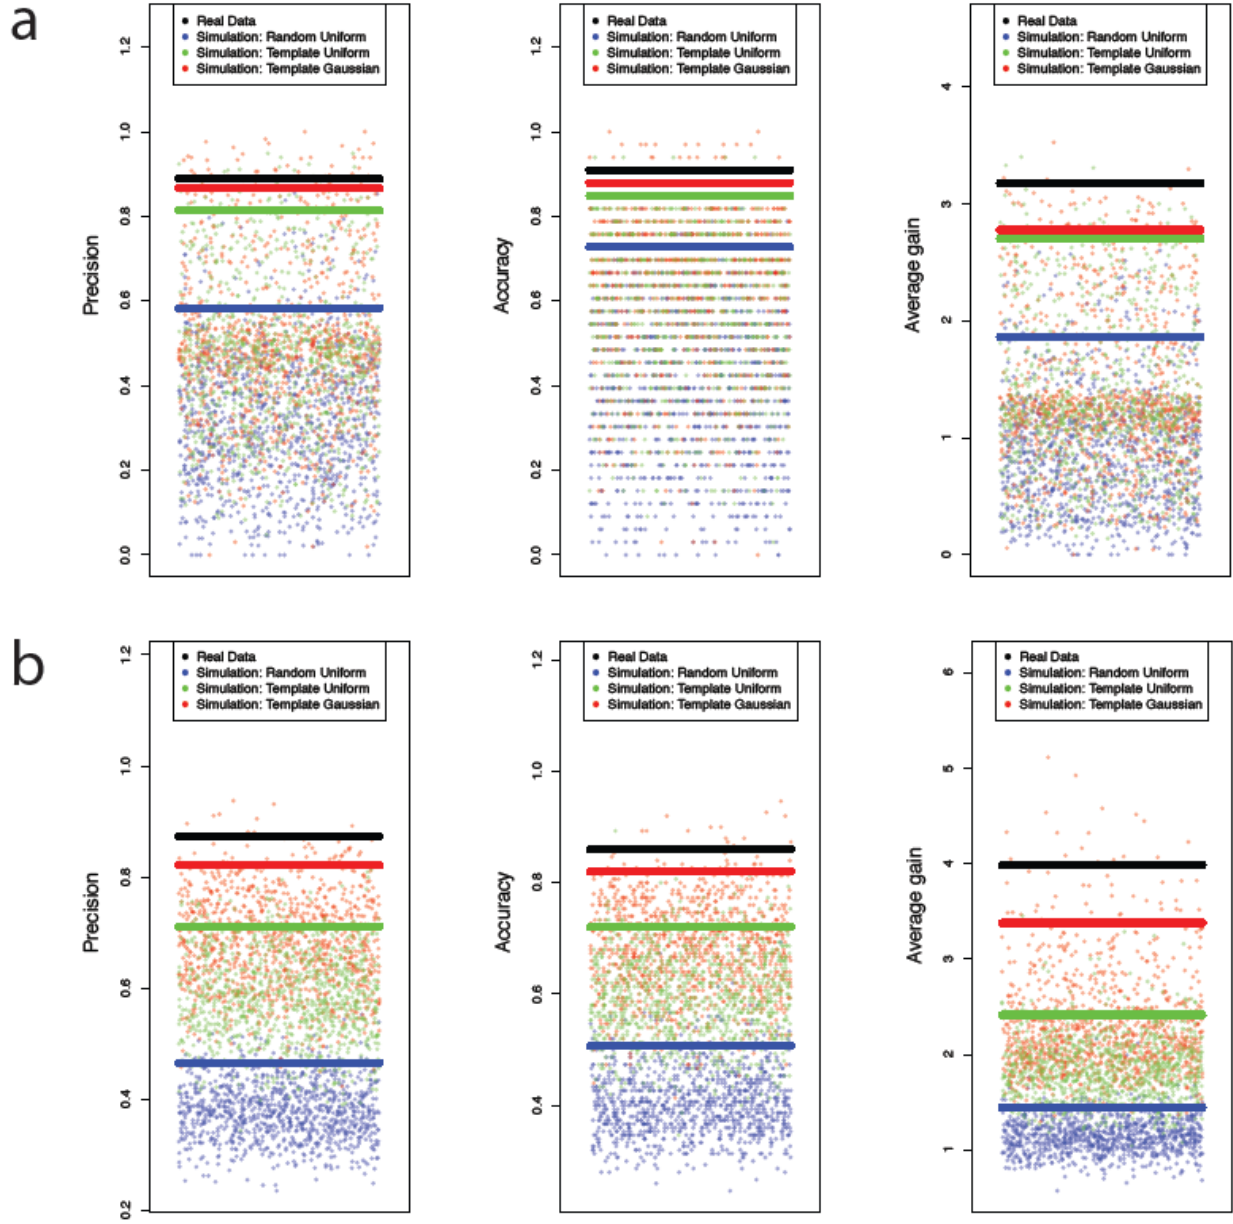

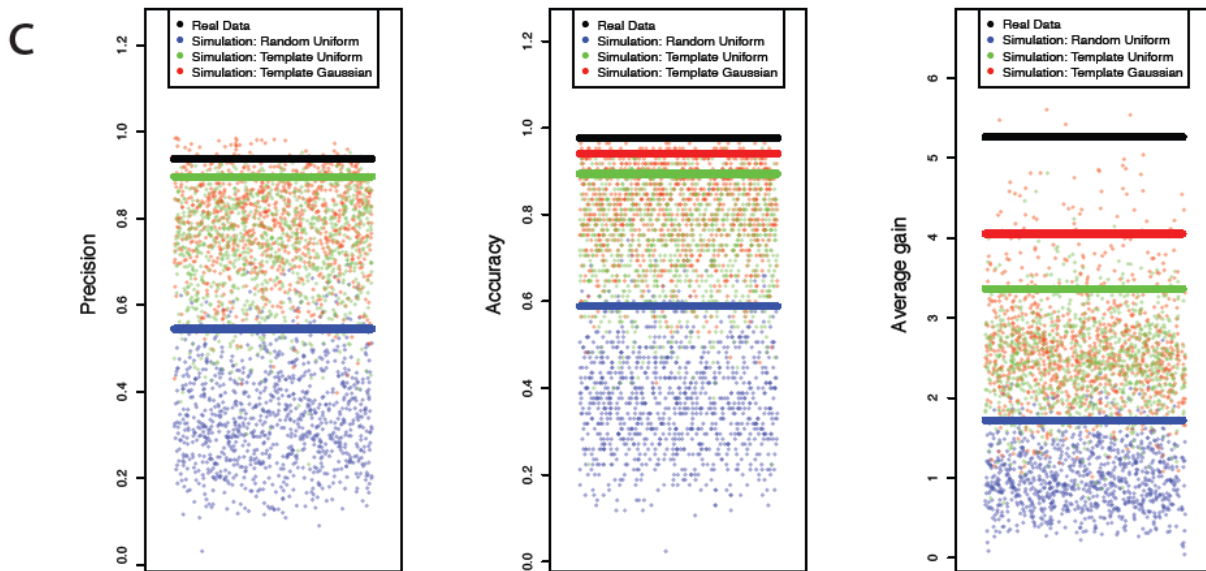

**Supplementary Figure 6. Assessing the accuracy of classification.**

Predictive power of the clusters from real data (black bar) is stronger than those from three kinds of simulations (colored dots) based on precision, accuracy and average gain for (a) Sanger-based metagenome, (b) pyrosequencing-based 16S and (c) Illumina-based metagenome datasets. See Supplementary Methods Sections 8 and 9 for details. Colored bars represent the 95% confidence intervals. P-values are listed in Supplementary Table 24.

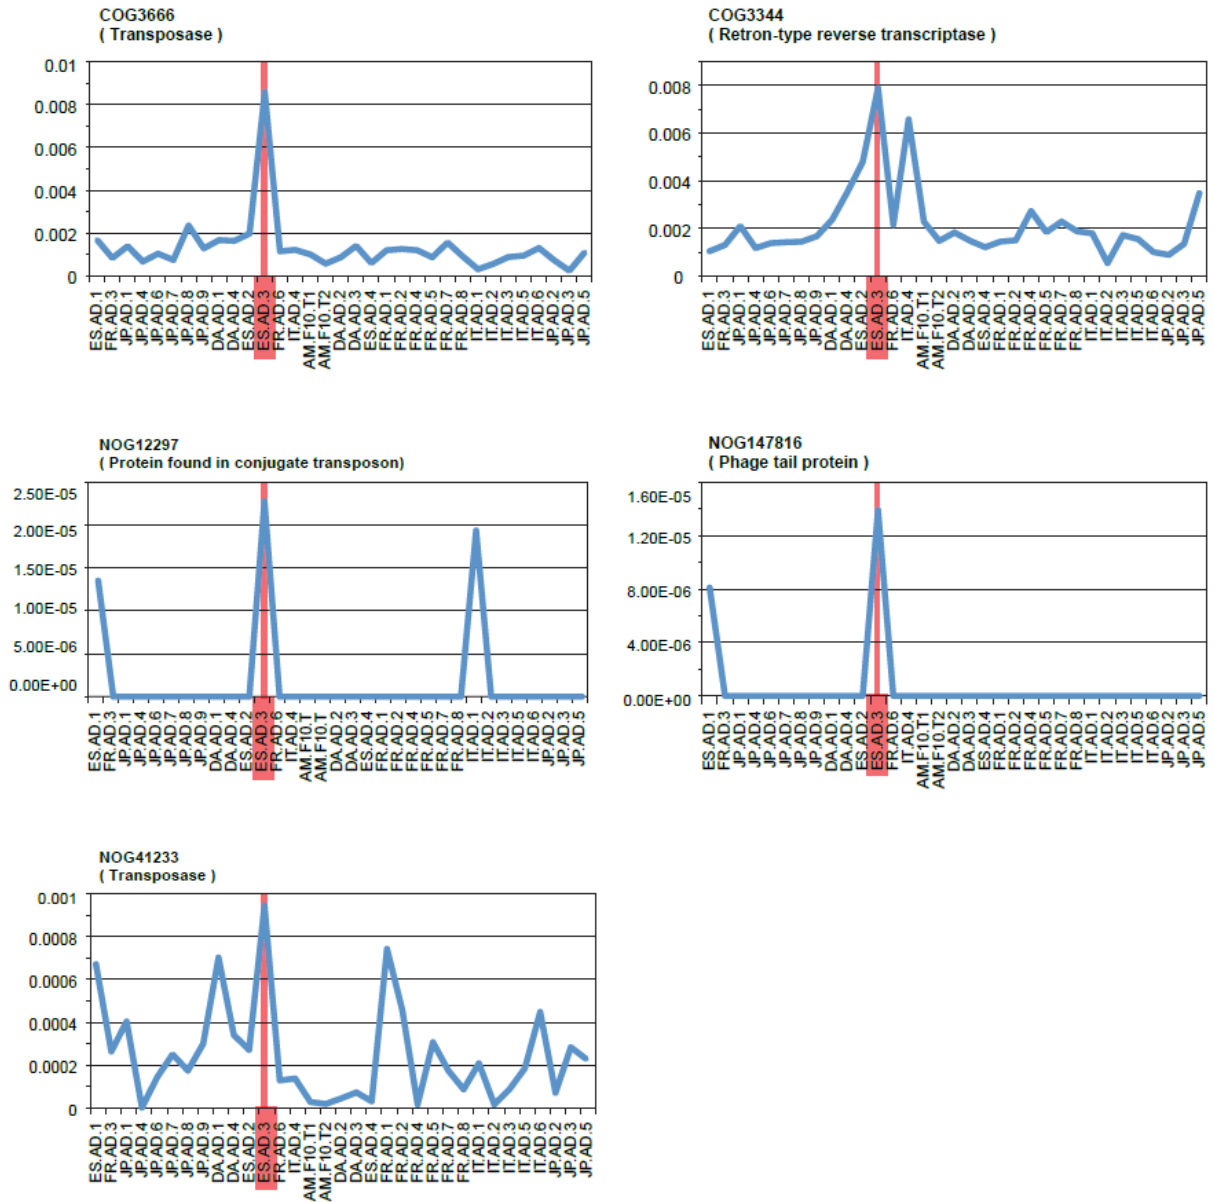

**Supplementary Figure 7. Elevated levels of phage-related proteins in Spanish individual ES-AD-3.**

ES-AD-3 has more than five times higher abundance than the rest of the samples in the five orthologous groups shown.



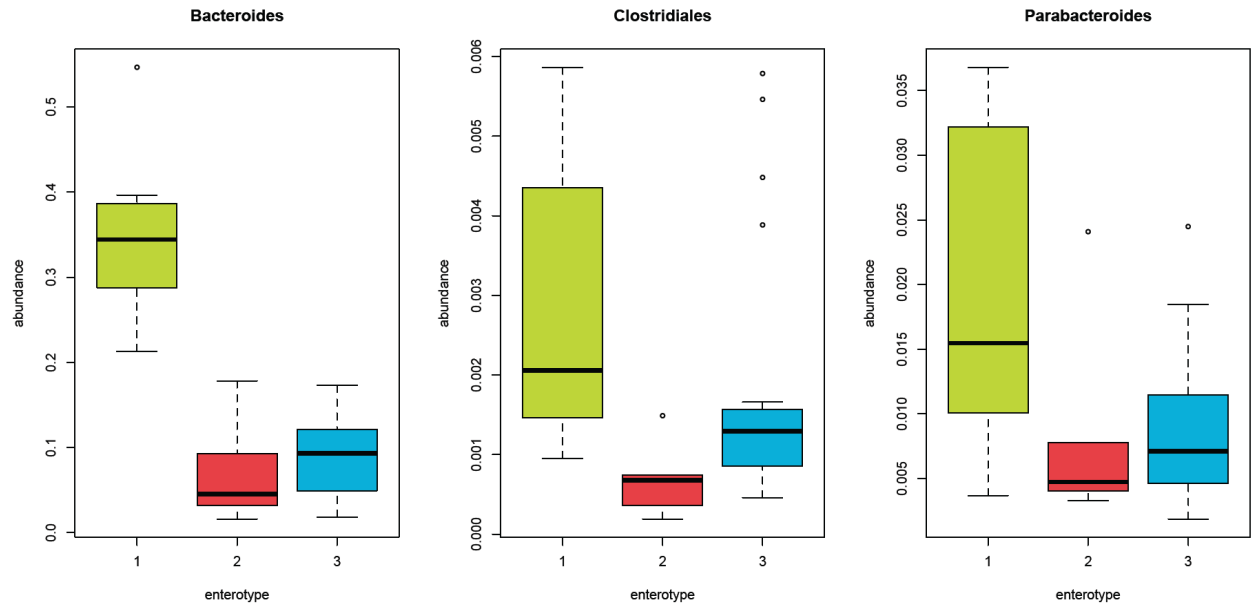

Supplementary Figure 8. Enrichment of *Bacteroides*, *Clostridiales* and *Parabacteroides* in enterotype 1.

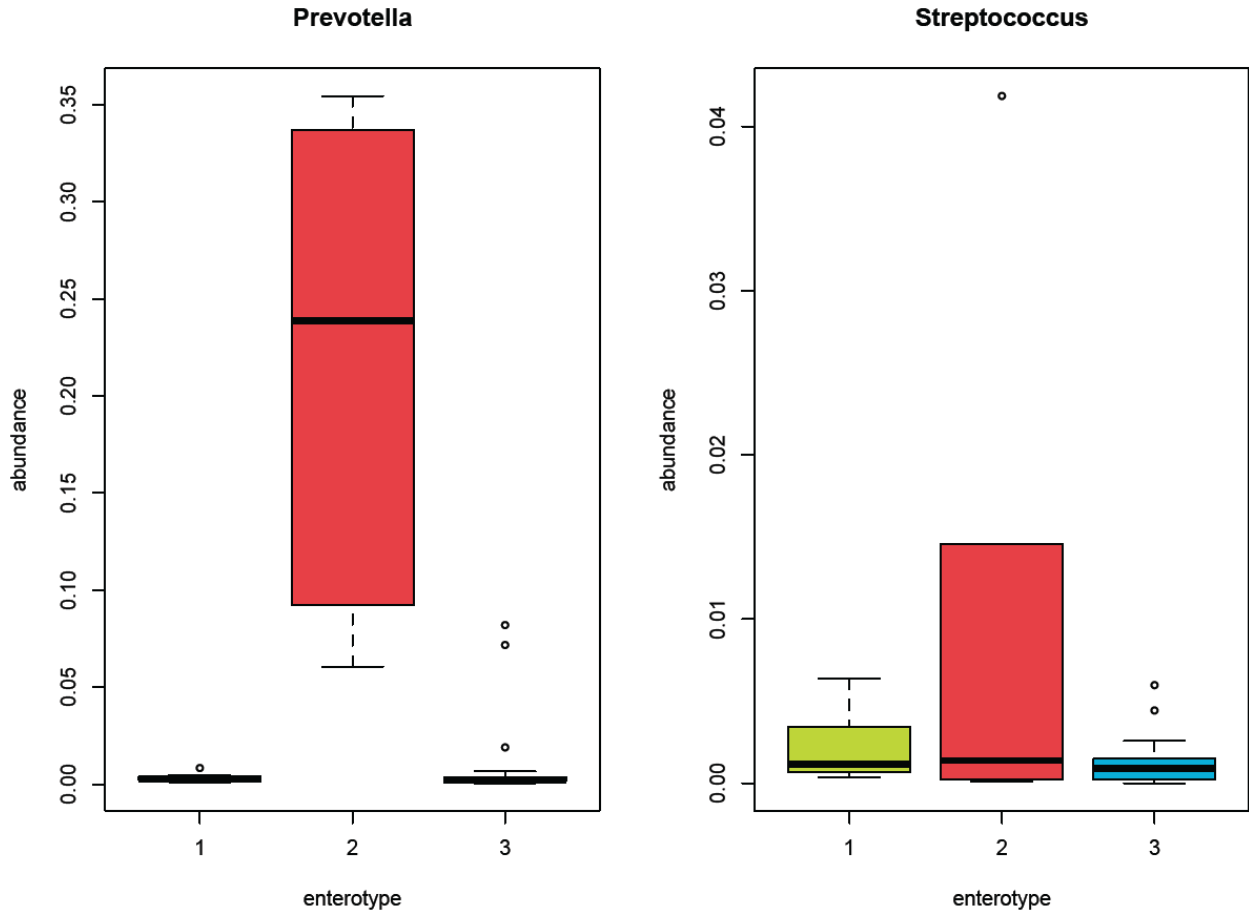

Supplementary Figure 9. Enrichment of *Prevotella* and *Streptococcus* in enterotype 2.

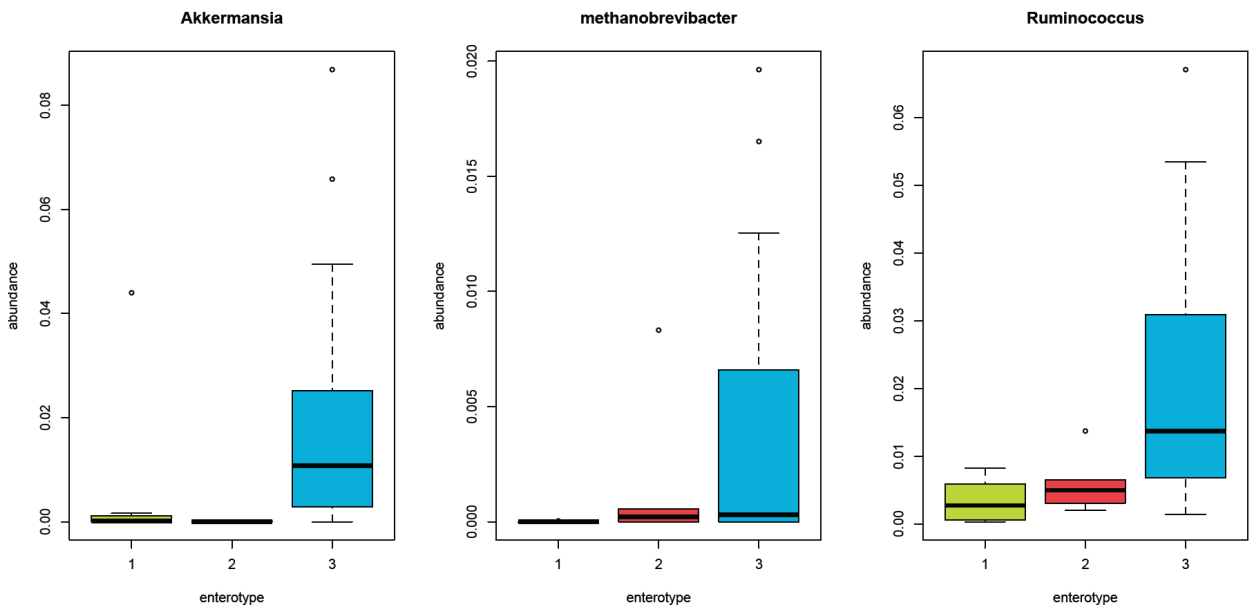

Supplementary Figure 10. Enrichment of *Akkermansia*, *Methanobrevibacter* and *Ruminococcus* in enterotype 3.

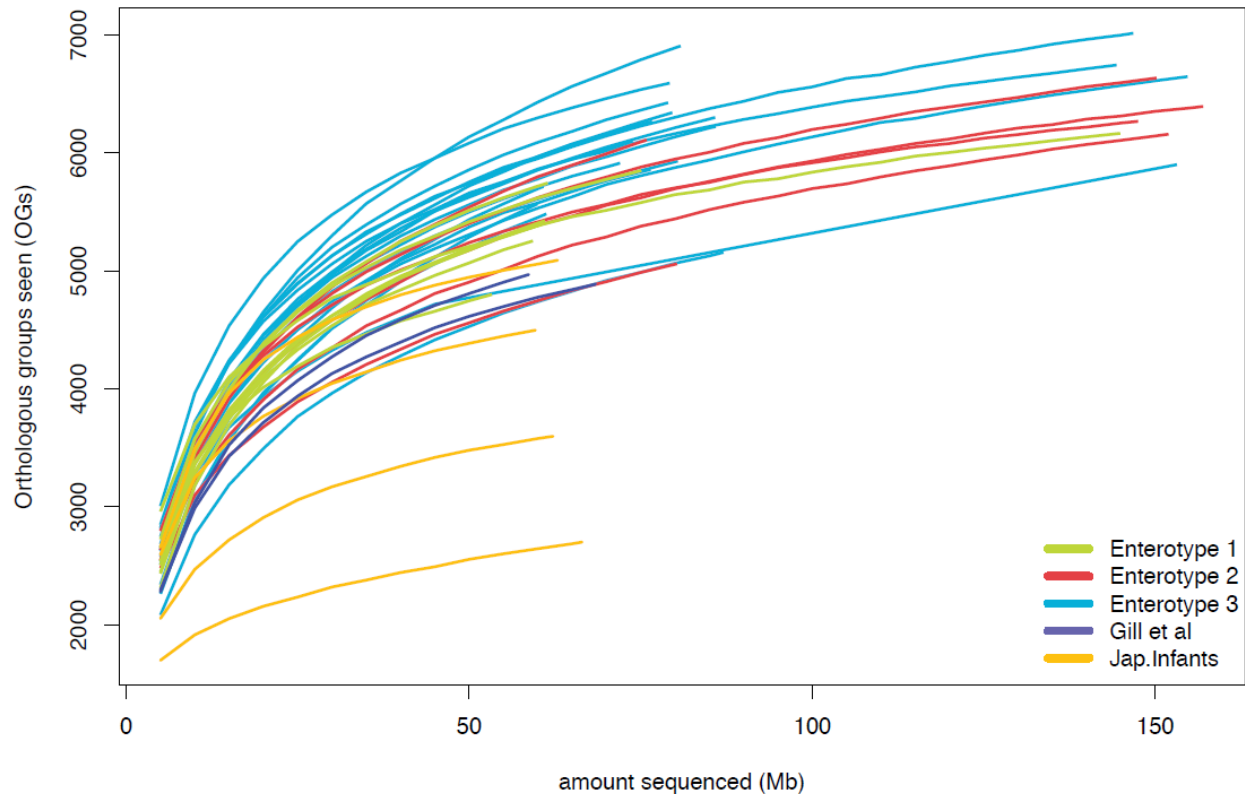

**Supplementary Figure 11. Effect of sequencing depth on function retrieval.**

Number of unique orthologous groups identified in 39 samples relative to the sequencing depth. Each sample is colored according to the enterotype it belongs to. Six samples that were removed before the enterotype clustering (four Japanese infants and two American individuals) are also shown. There is no difference between the enterotypes based on functional alpha diversity.

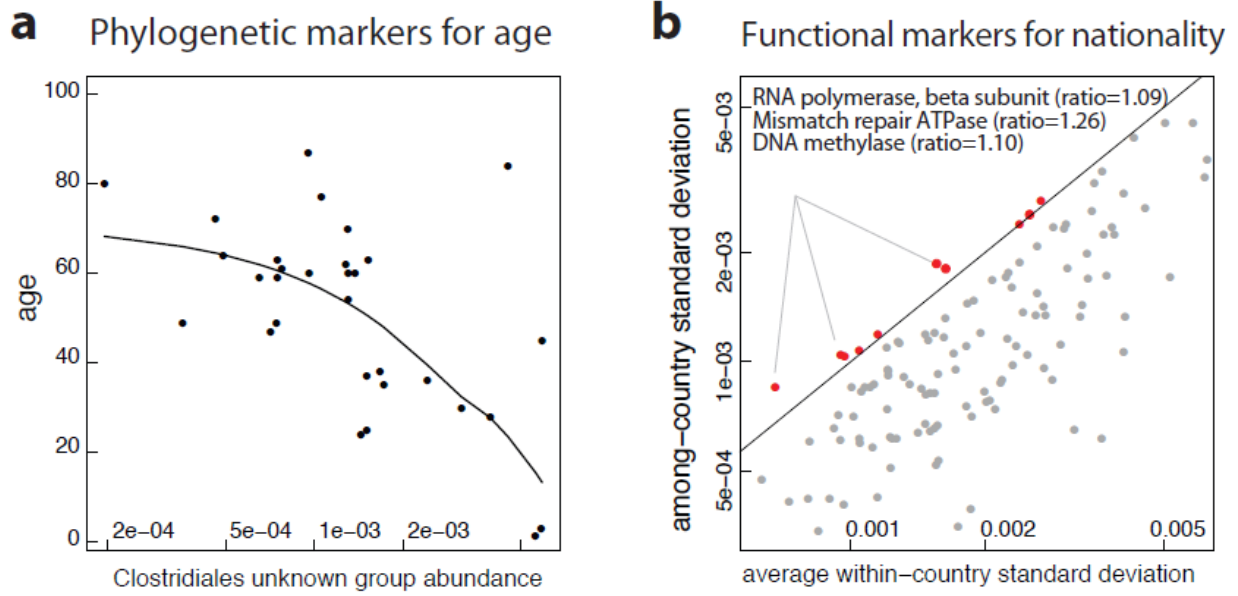

**Supplementary Figure 12. Correlations with host properties.** (a) Negative correlation of abundance of an unknown Clostridiales genus with age (pairwise correlation  $p=0.02$ ,  $\rho=-0.55$ ). (b) Variation of orthologous groups (OGs) with nationality. The plot compares the among-nationality standard deviation (SD) with the within-nationality SD. Points above the diagonal (red, discussed in text) represent OGs whose abundance varies more among than within nationalities. See Supplementary Table 14 for a full list.

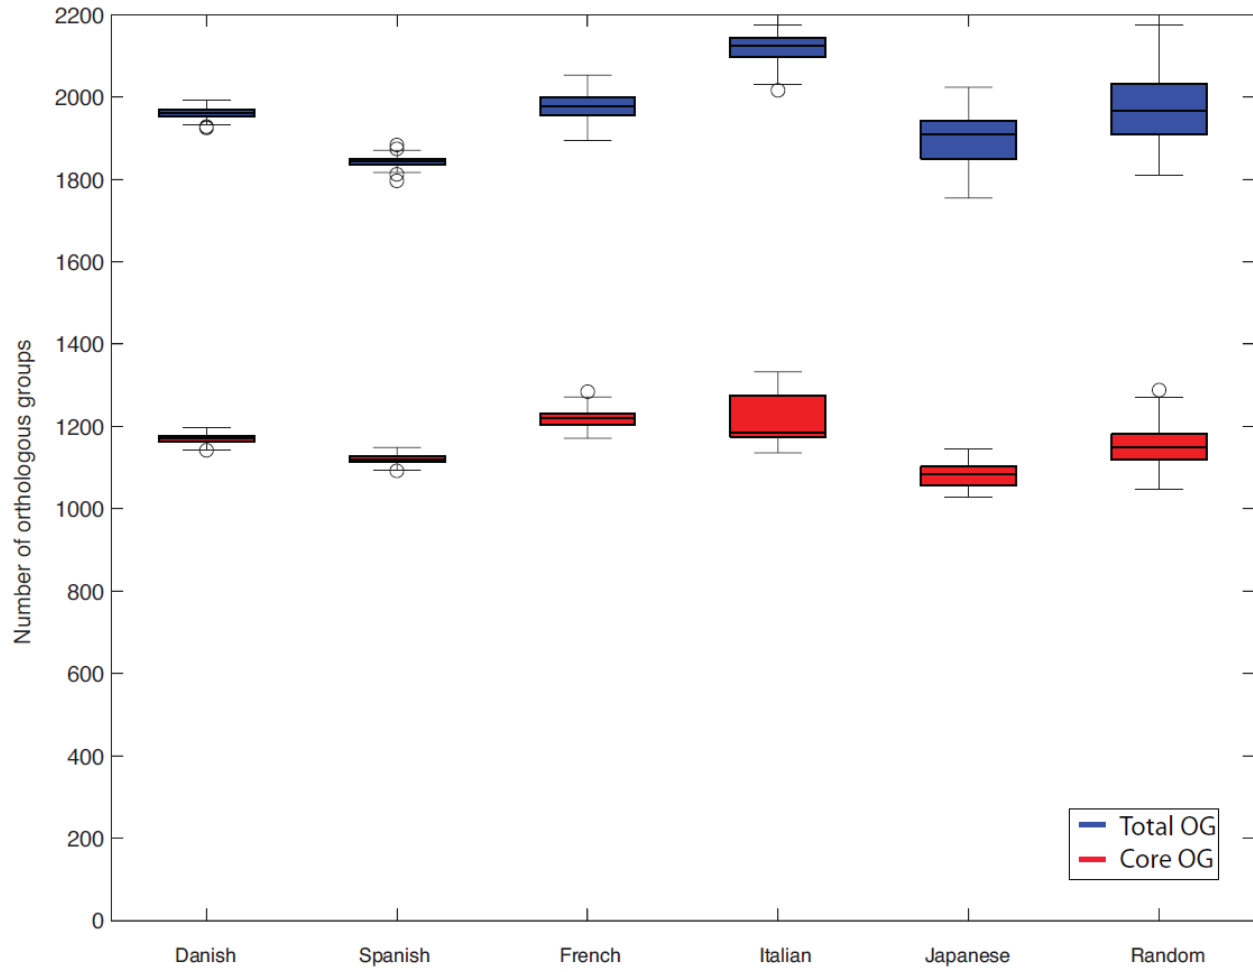

**Supplementary Figure 13. Core metagenome sizes in metagenomes from different nations are similar.**

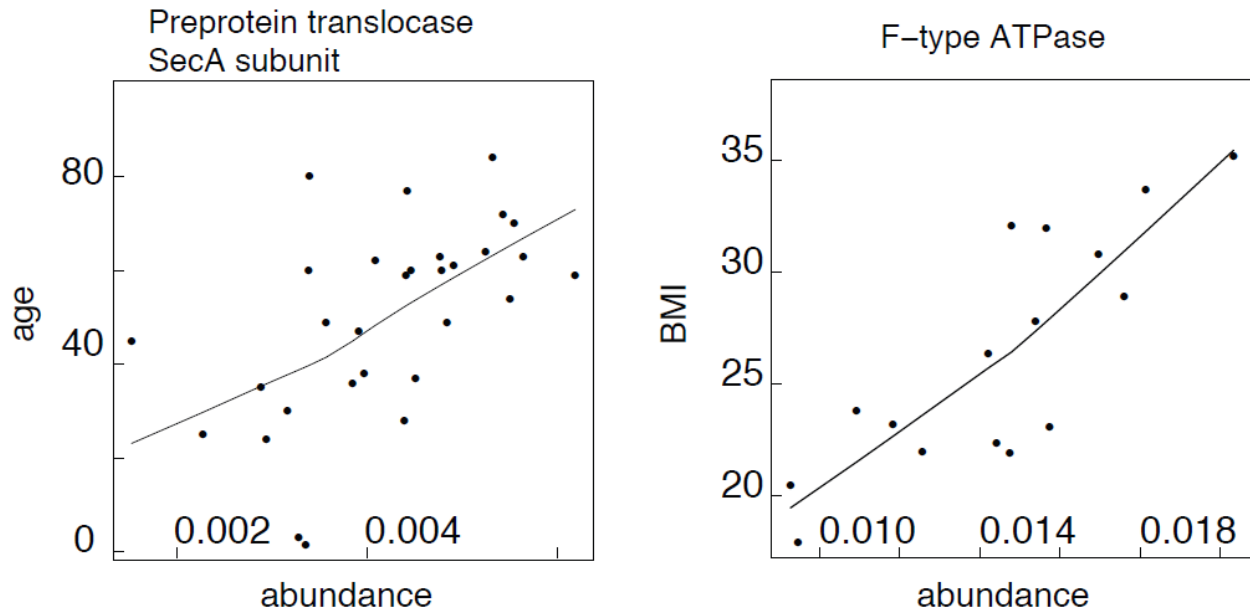

**Supplementary Figure 14. Correlations of functions with host properties.** Left: pairwise correlation of preprotein translocase secA subunit (COG0653) with host age ( $p=0.0008$ ,  $\rho=0.57$ ). Right: pairwise correlation of F-type ATPase (KEGG module M00286) with host body mass index ( $p=0.04$ ,  $\rho=0.78$ ).

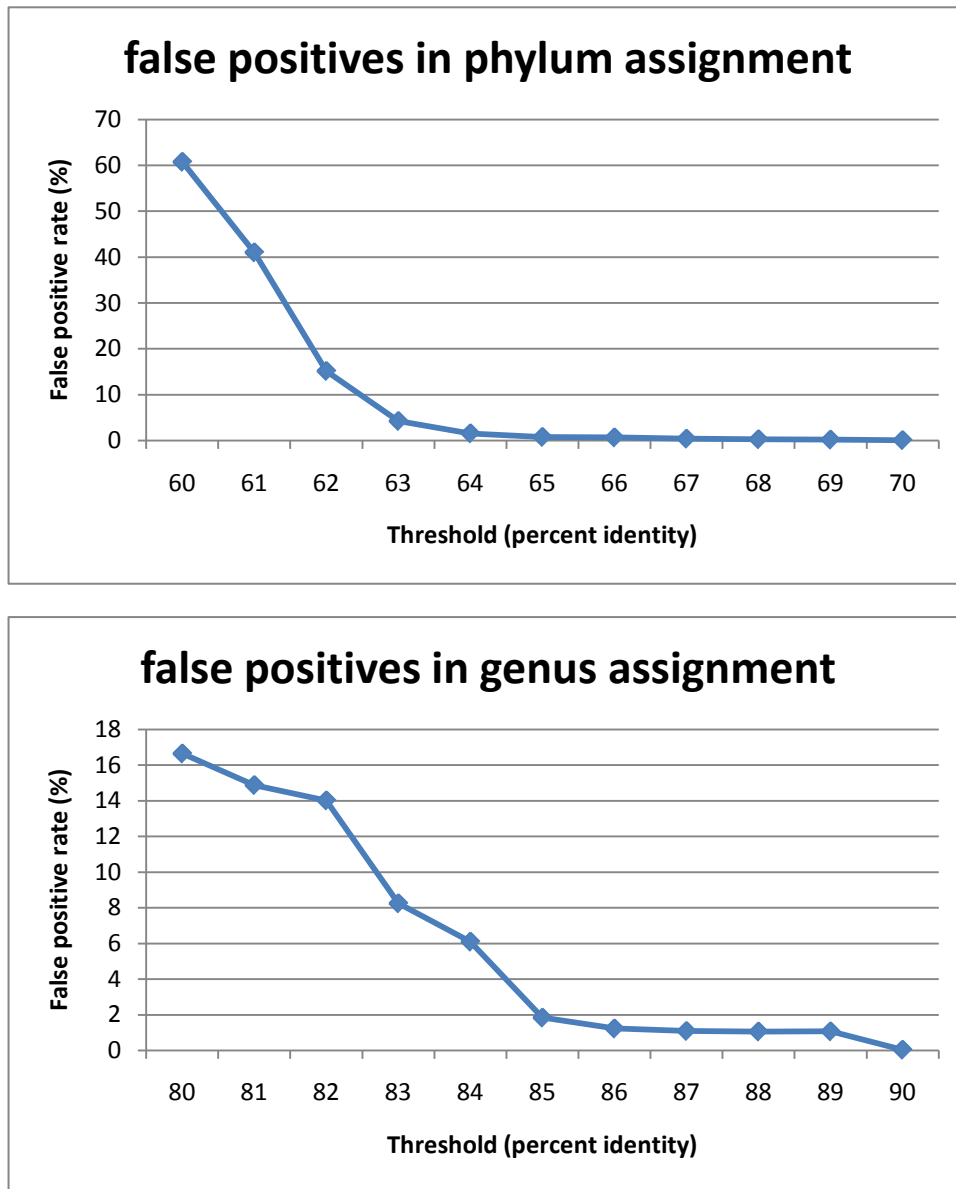

**Supplementary Figure 15. False positive rates at the phylum and genus levels estimated by pairwise comparisons of 40 marker genes for different sequence similarity thresholds.**

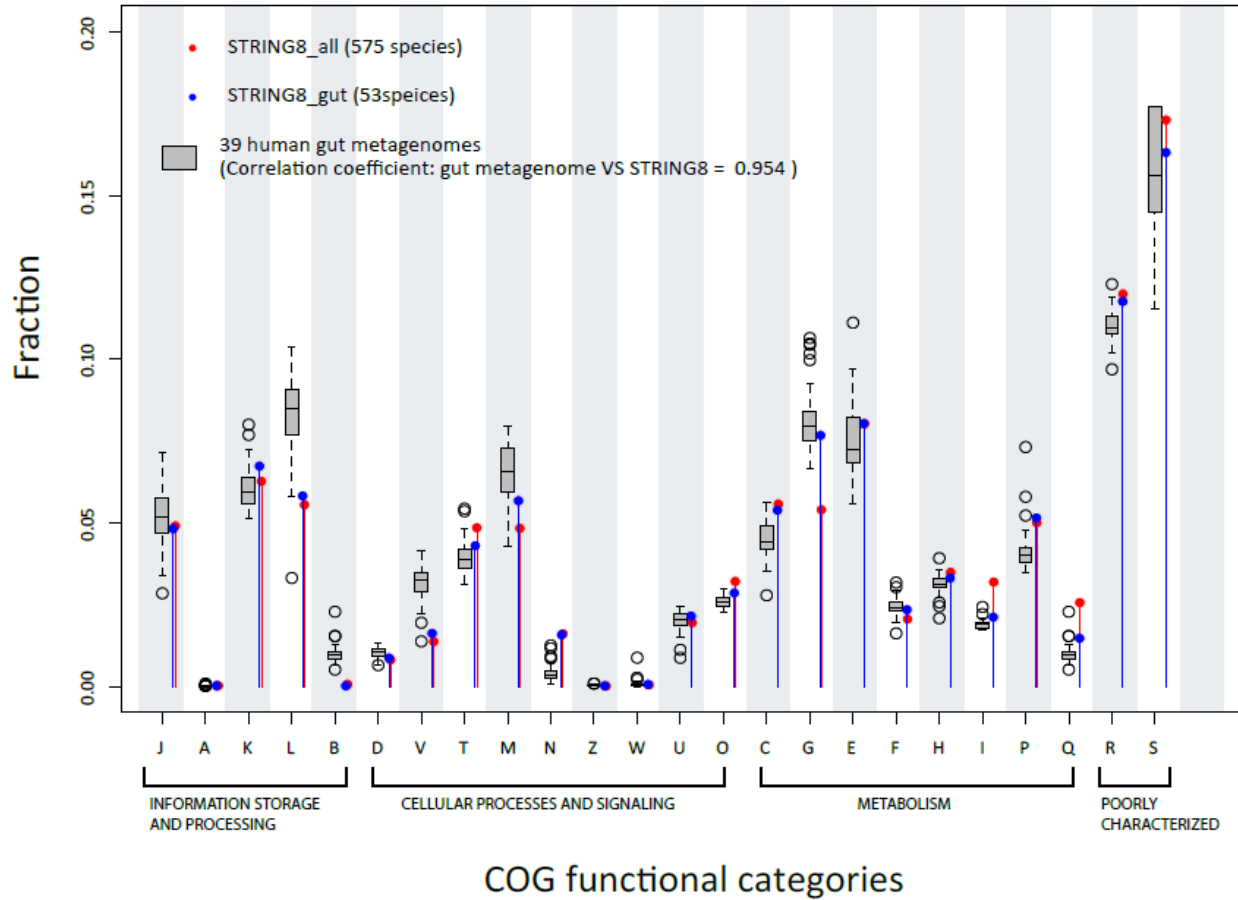

### Supplementary Figure 16. Abundance distribution of COG functional categories

Abundance distribution of COG functional categories in 575 bacterial species in STRING v8.0 (red), 53 gut-associated species stored in the STRING v8.0 (blue) and 39 metagenomic samples (gray boxes). Distributions of metagenomic samples are similar to gut-associated bacteria.

Functional category L (replication, recombination and repair), V (defense mechanisms), M (cell wall/membrane/envelope biogenesis) and G (carbohydrate transport and metabolism) are enriched in the gut metagenomes. In particular, enrichment of L and V is not supported by gut specific bacteria in STRING (blue). This implies metagenomic data includes several bacteria which are not in STRING, and have higher ratio of these functional categories.



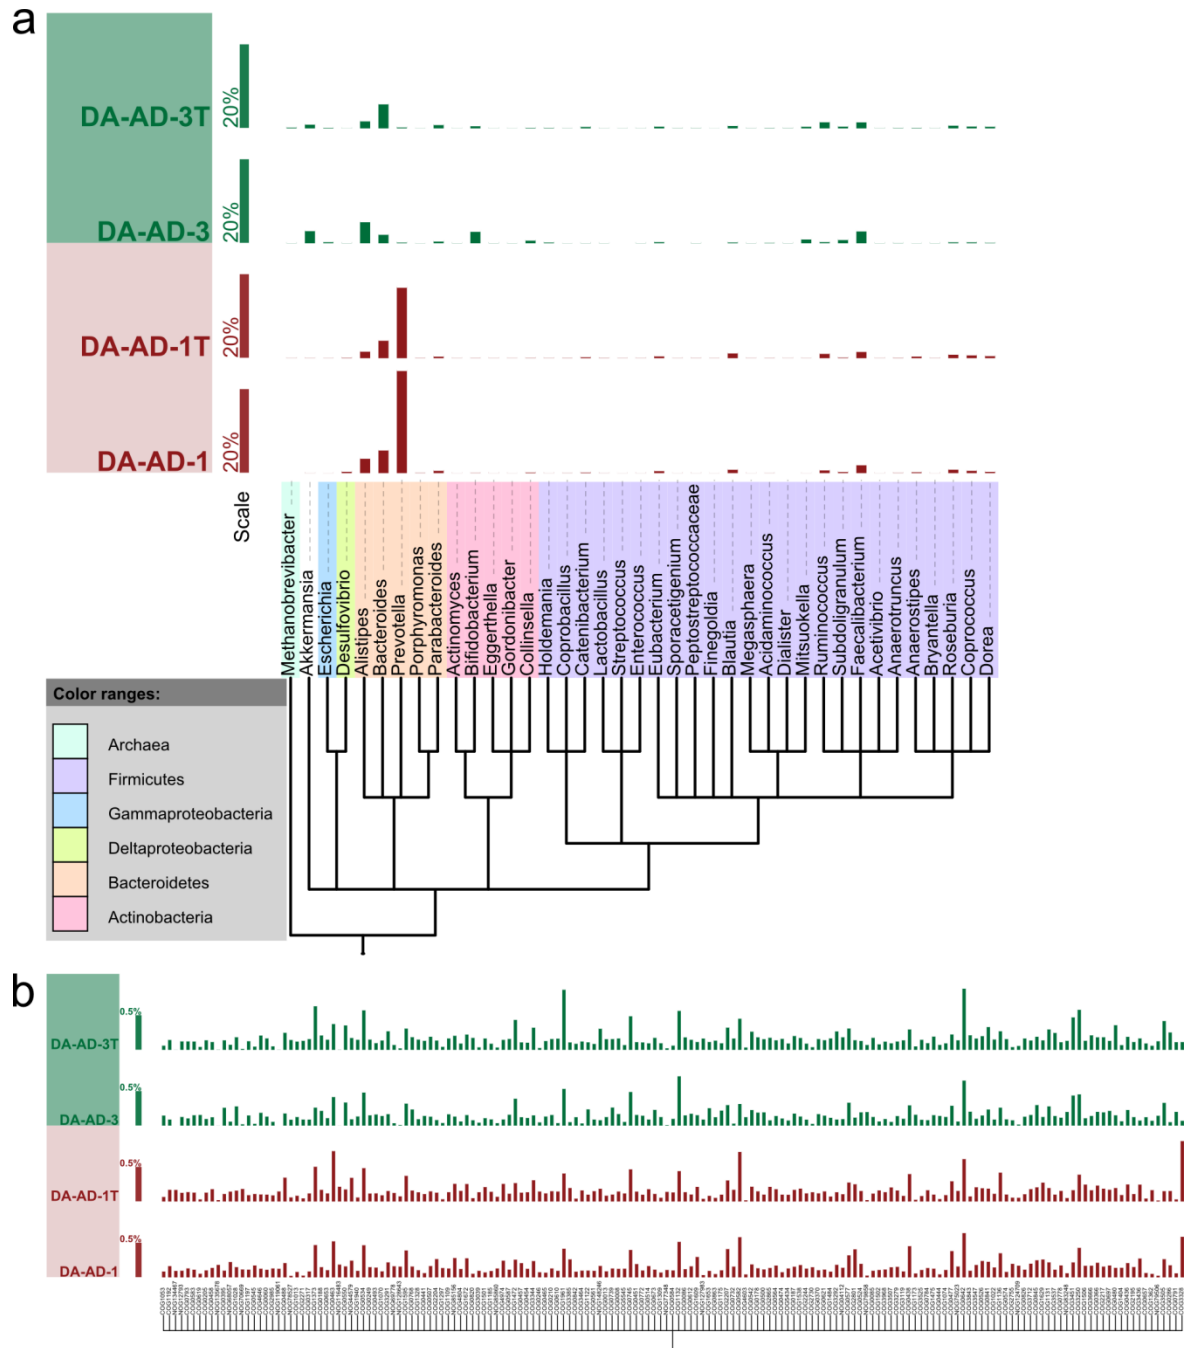

**Supplementary Figure 17. Genus and eggNOG orthologous group (OG) abundance distributions of Sanger and 454 Titanium based sequences from the same samples are similar.**

DA-AD-1 and DA-AD-1T are Sanger and 454 Titanium based sequences from MH6. DA-AD-3 and DA-AD-3T are from MH12. a) Genus abundance. Pearson correlation coefficients between DA-AD-1/DA-AD-1T is 0.9852, between DA-AD-3/DA-AD-3T is 0.9968. (Background for DA-AD-1/DA-AD-3 is 0.9037; DA-AD-1T/DA-AD-3T is 0.9624). b) Abundance of 50 most abundant orthologous groups. Pearson correlation coefficients between DA-AD-1/DA-AD-1T is 0.9482, between DA-AD-3/DA-AD-3T is 0.9153. (Background for DA-AD-1/DA-AD-3 is 0.8408; DA-AD-1T/DA-AD-3T is 0.8436).

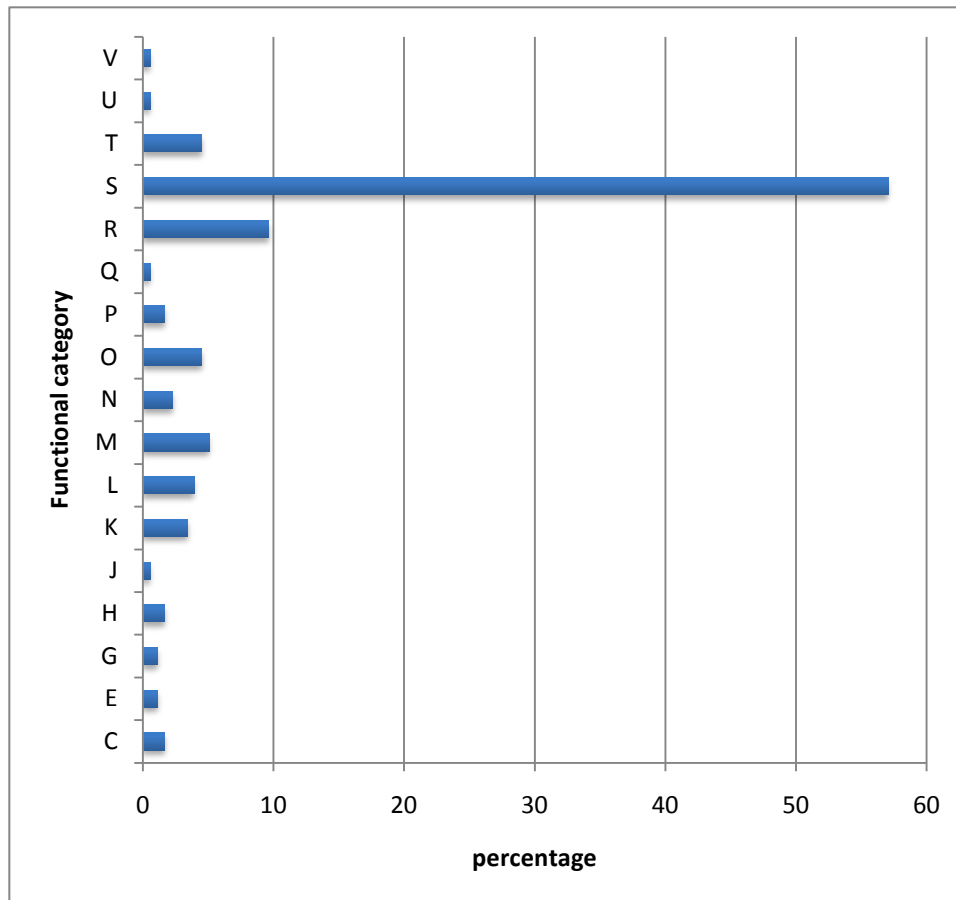

**Supplementary Figure 18. Functional composition of most differing OGs between Sanger and 454 datasets.**

The 1% OGs that differ most in abundance between DA-AD-1/DA-AD-1T (1% with highest DA-AD-1/DA-AD-1T ratio + 1% with lowest) and DA-AD-3/DA-AD-3T (likewise) were mapped on COG functional categories, excluding OGs with zero abundance in any sample to avoid artifacts. These results indicate that mostly unknown functions (from smaller, low abundant OGs, data not shown) differ between these two datatypes.

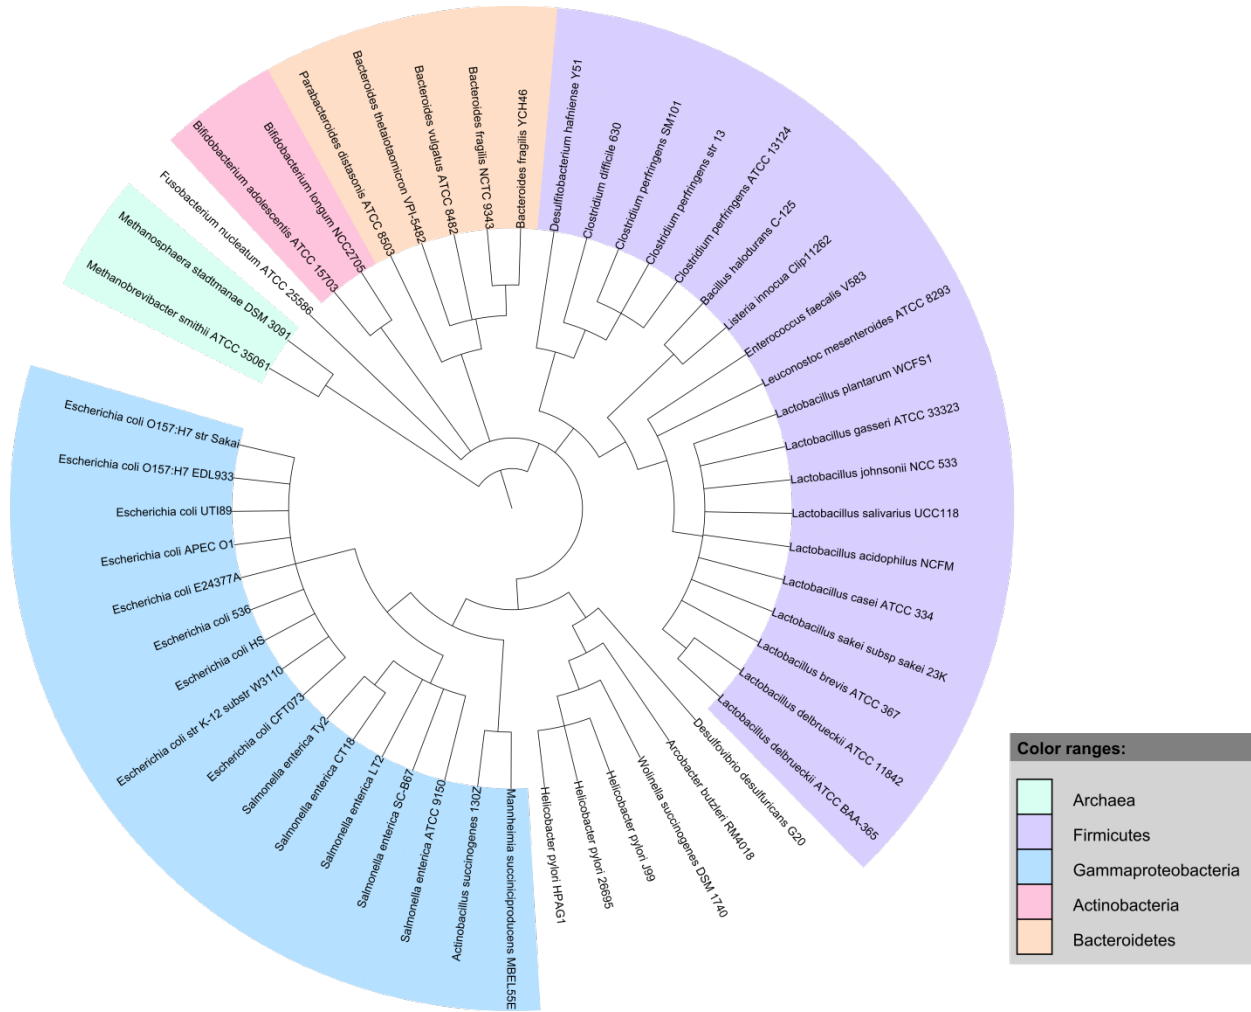

Supplementary Figure 19. Phylogenetic tree of the 53 gut-specific genomes out of the 575 prokaryotic genomes in STRING.

### Histogram of uncharacterized OGs ranks

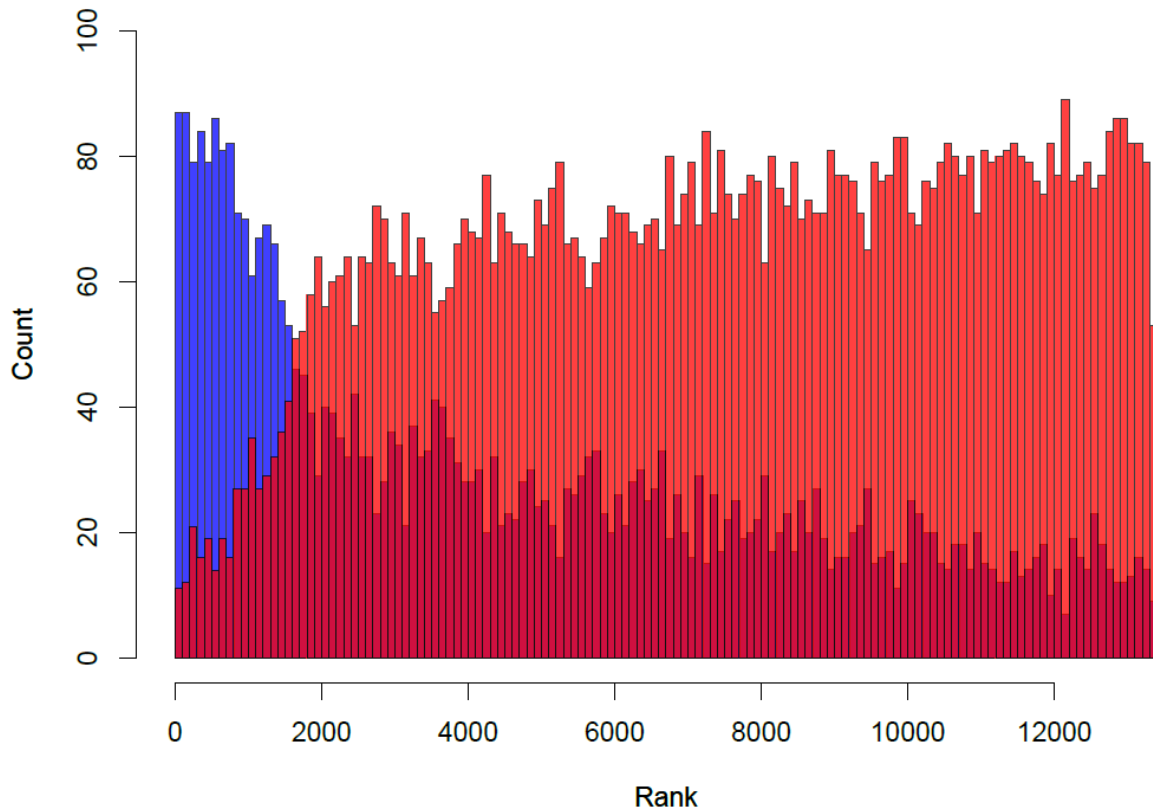

**Supplementary Figure 20. Lower ranked functions are enriched in uncharacterized orthologous groups (OGs), agreeing with the findings of ref. 79.**

A histogram of the number of functionally characterized (blue) and uncharacterized (red) OGs ranked by their average abundance in 35 metagenomes shows that uncharacterized proteins usually form small OGs (hence are predominantly ranked lower in abundance). In contrast, functionally characterized OGs are large with many genes and are usually ranked higher in abundance.

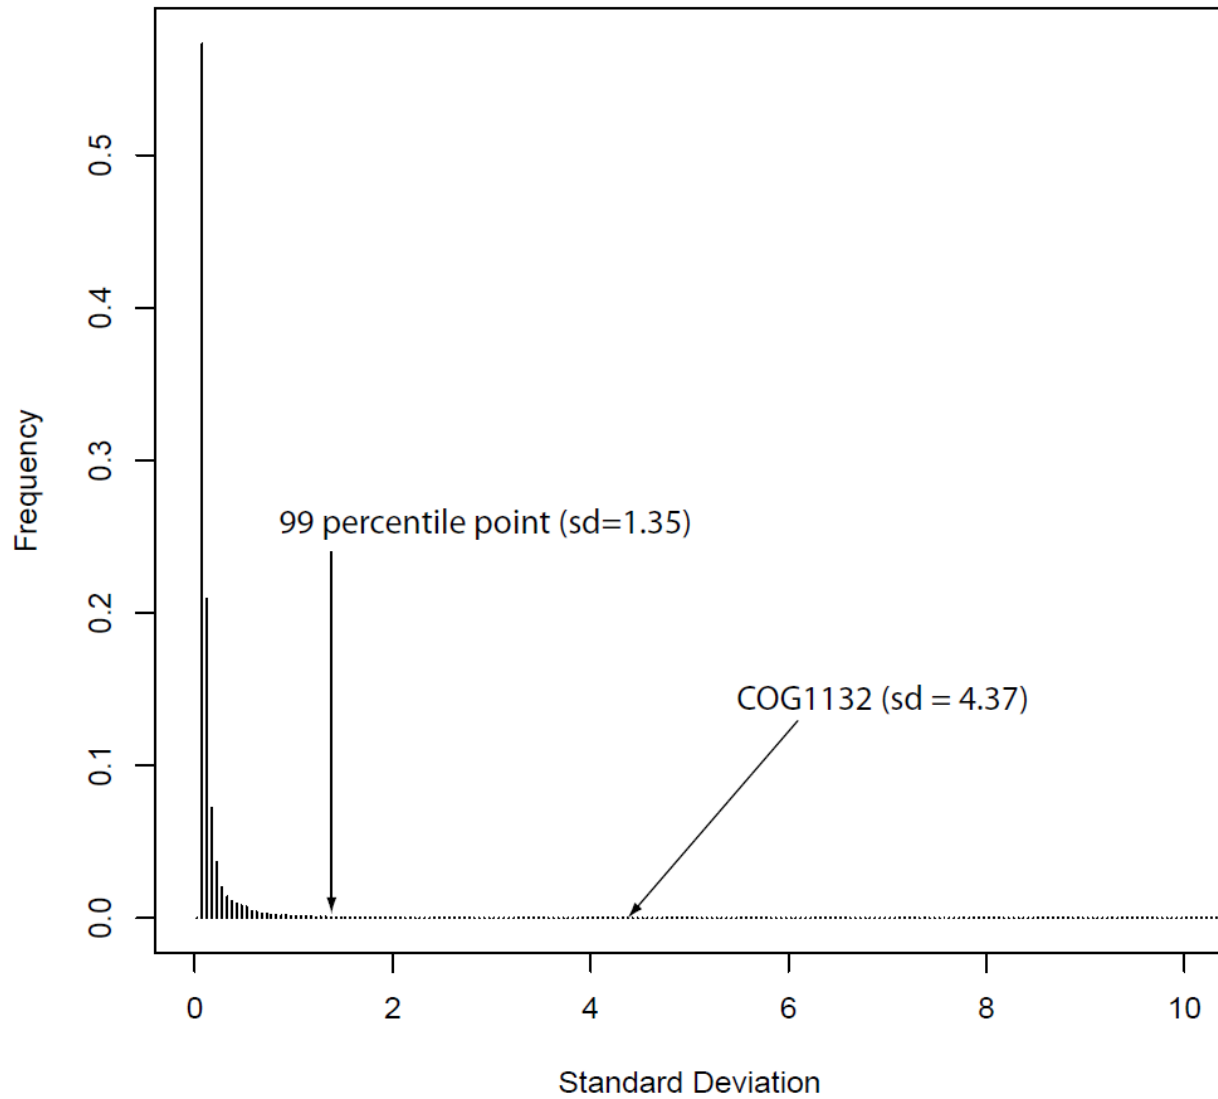

**Supplementary Figure 21. Distribution of standard deviation of the number of genes in orthologous groups in the STRING database.**

COG1132 is at 99.8 percentile, meaning only 0.2% of the orthologous groups in STRING have a higher variation in the number of genes than COG1132.

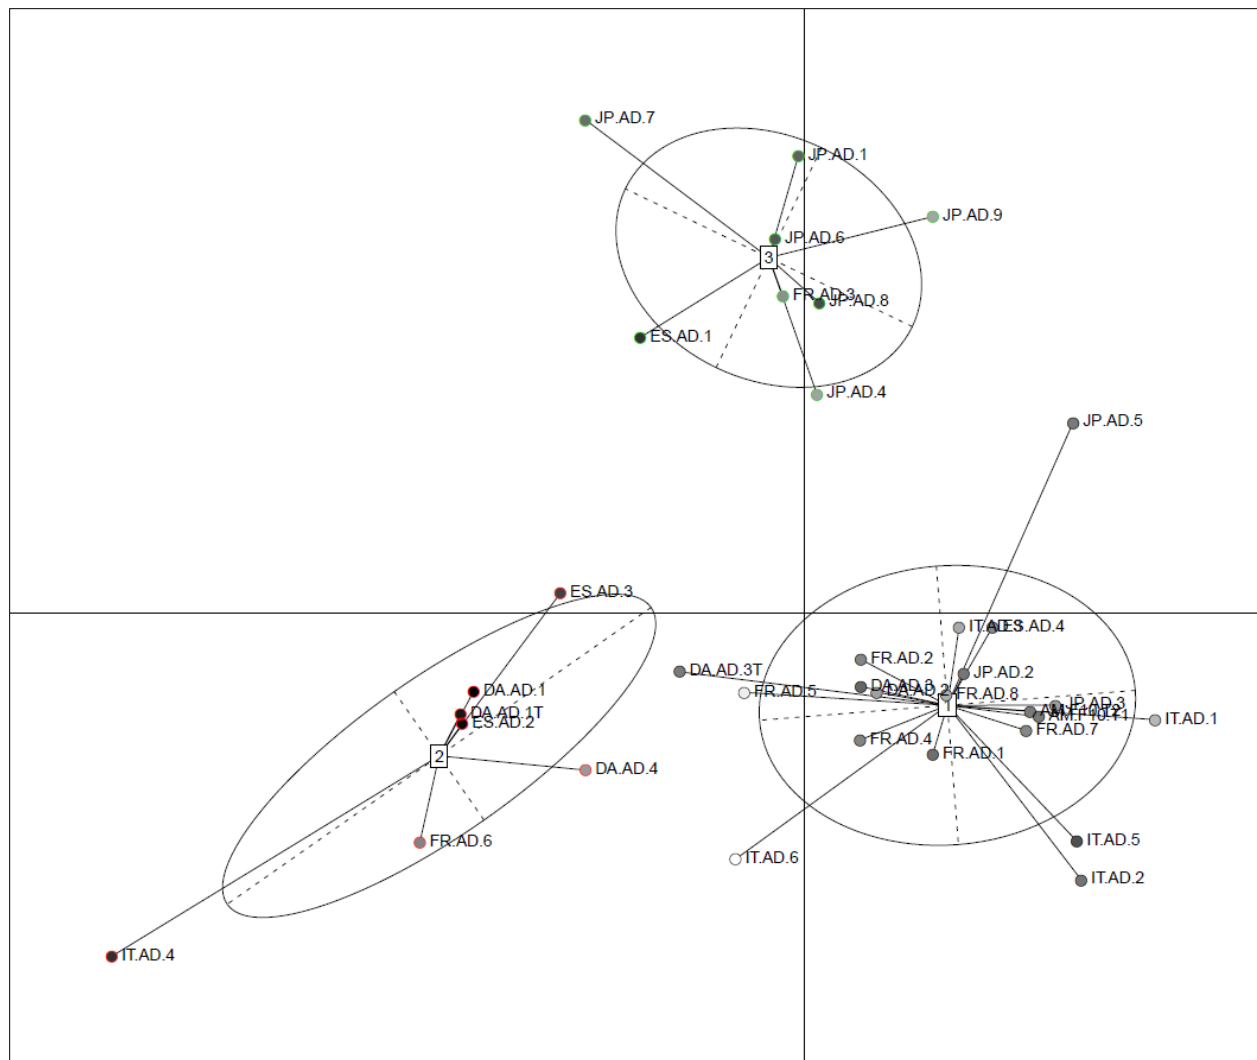

**Supplementary Figure 22. Pyrosequencing-based metagenomes from two Danish samples (DA-AD-1T and DA-AD-3T) cluster in the same enterotypes along with the Sanger-based metagenomes from the same samples (DA-AD-1 and DA-AD-3).**

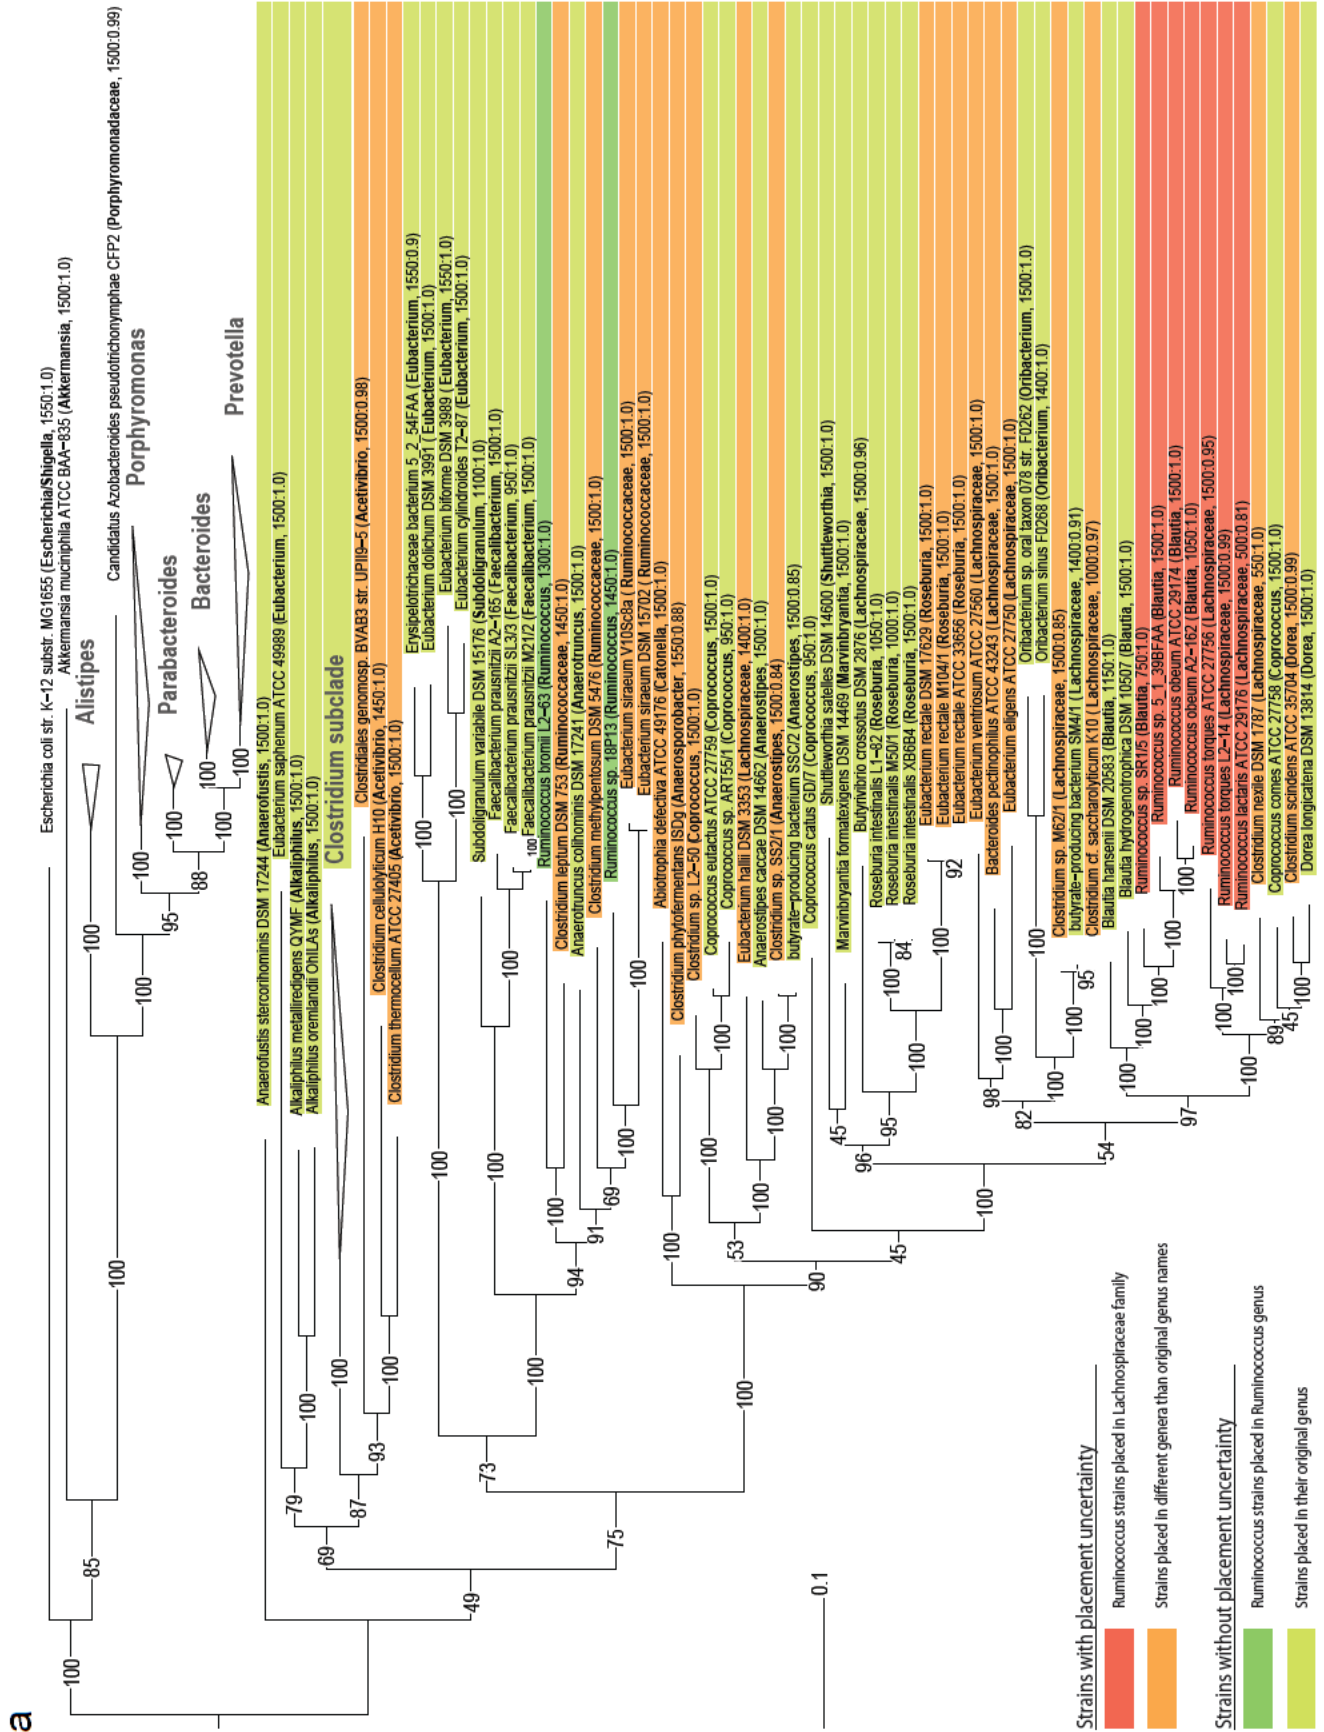

Strains with placement uncertainty

- Ruminococcus strains placed in Lachnospiraceae family
- Strains placed in different genera than original genus names

Strains without placement uncertainty

- Ruminococcus strains placed in Ruminococcus genus
- Strains placed in their original genus





**Supplementary Figure 23. Taxonomic uncertainties in Clostridiales observed through Maximum likelihood tree of 129 strains from Firmicutes (a) and Bacteroidetes (b), constructed from 40 single copy marker genes<sup>51,85</sup> using RAxML<sup>86</sup> v 7.04.** Phylogenetic classification of these strains by RDP classifier based on 16S rRNA gene sequences are given in parenthesis, along with the confidence threshold and approximate length (minimum length 500bp, minimum confidence threshold 0.8). Bootstrap proportion values from 100 replicates are shown on each branch. *E. coli* and *A. muciniphila* were included as outgroups. For clarity, Bacteroidetes subclades are collapsed in (a) and Firmicutes subclades are collapsed in (b). 7 out of 9 *Ruminococcus* (driver of enterotype 3 in Sanger dataset, Fig. 2a) strains are placed in Lachnospiraceae, very close to *Blautia* (driver of enterotype 3 in 16S dataset, Fig. 2c) and other unclassified Lachnospiraceae (driver of enterotype 3 in Illumina dataset, Fig. 2b). 22 strains out of 40 in Lachnospiraceae are placed in different genera than their original genus names suggest. Similarly, four strains out of 11 in Ruminococcaceae are placed in different genera. In contrast, only one strain out of 57 in Bacteroidetes is placed in different genus than its genus name suggests, showing consistency of taxonomy in this clade that contains the drivers for enterotypes 1 and 2 in all three datasets.

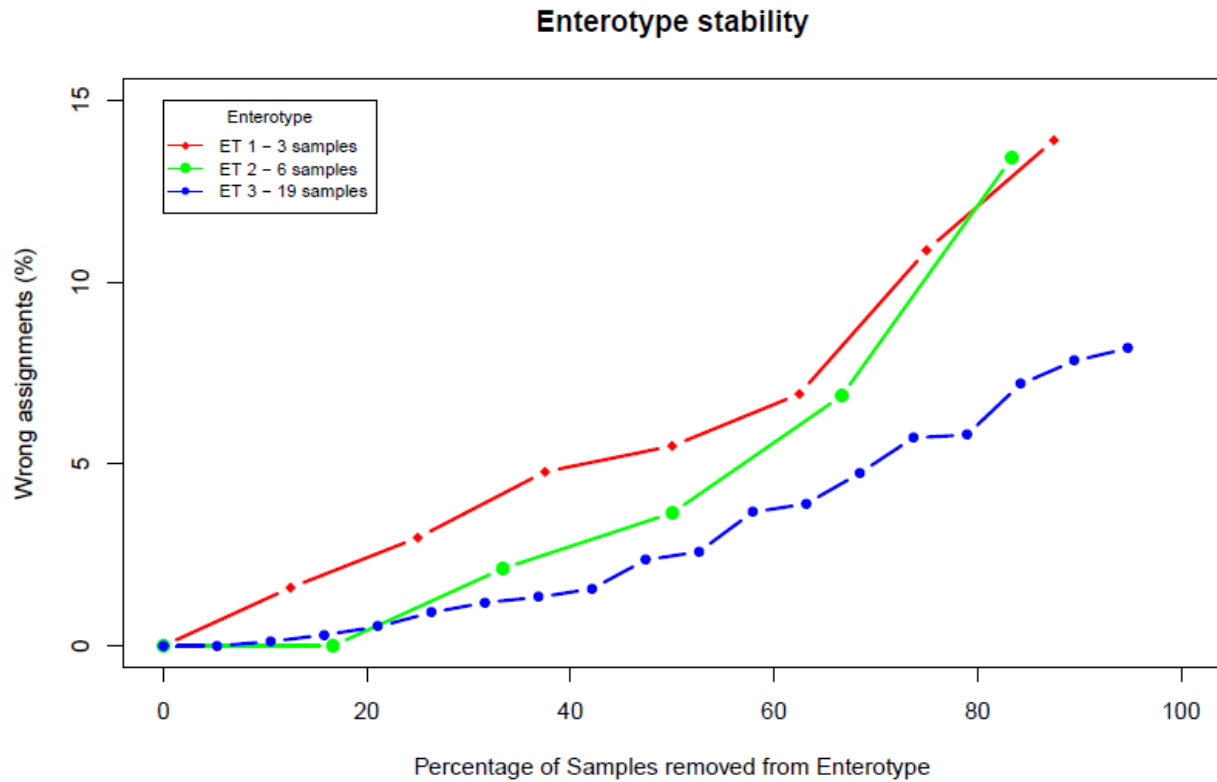

**Supplementary Figure 24. Effect of removing samples from an enterotype on the clustering behavior.**

We randomly removed a certain percentage of samples (x-axis) from each enterotype 1000 times and re-clustered, and estimated the average misassignment percentage (y-axis) over all three enterotypes. Clusters generally stay intact – even when half the samples from a cluster, less than 6% of the samples are assigned to the wrong cluster.

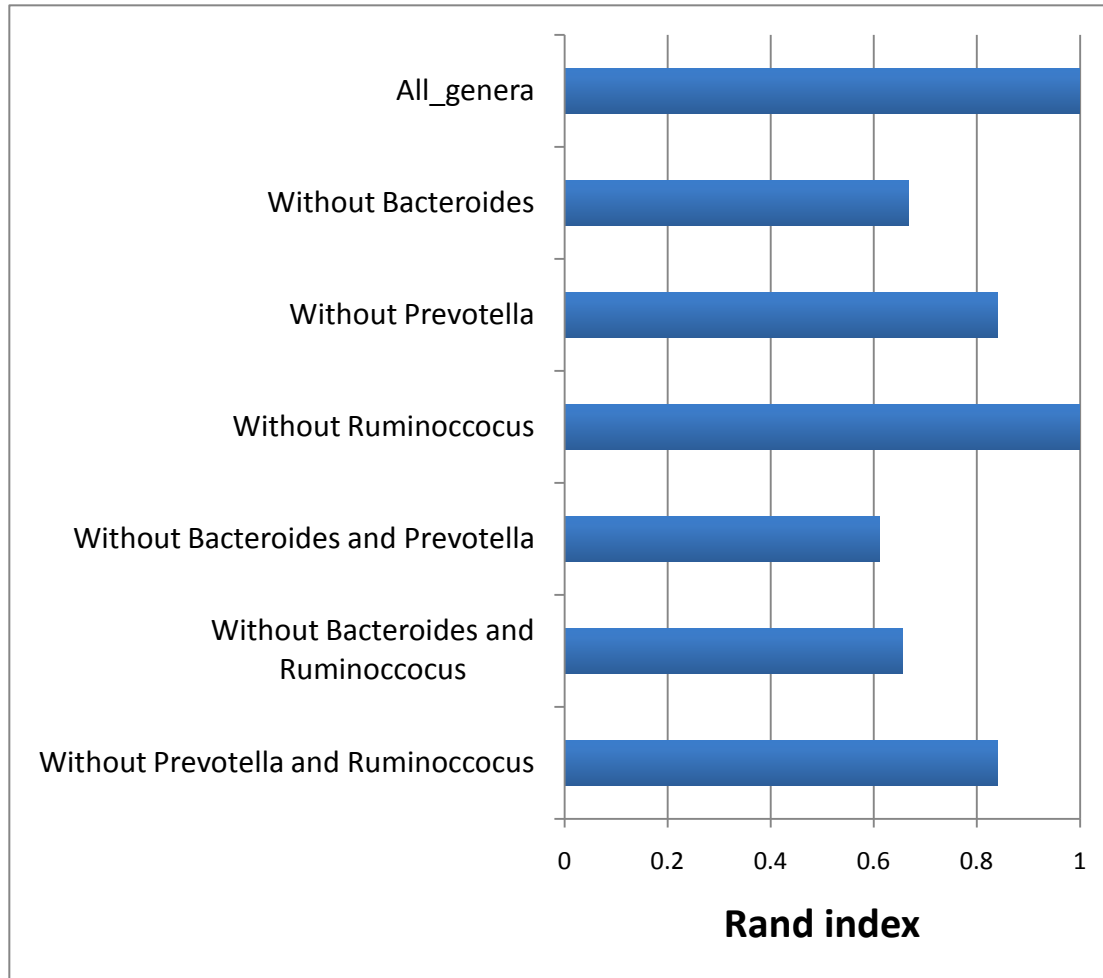

**Supplementary Figure 25. Effects of removing major drivers of enterotypes.** Enterotype clusters can be recovered when two out of the three major drivers (except *Bacteroides*) are removed either individually or altogether.

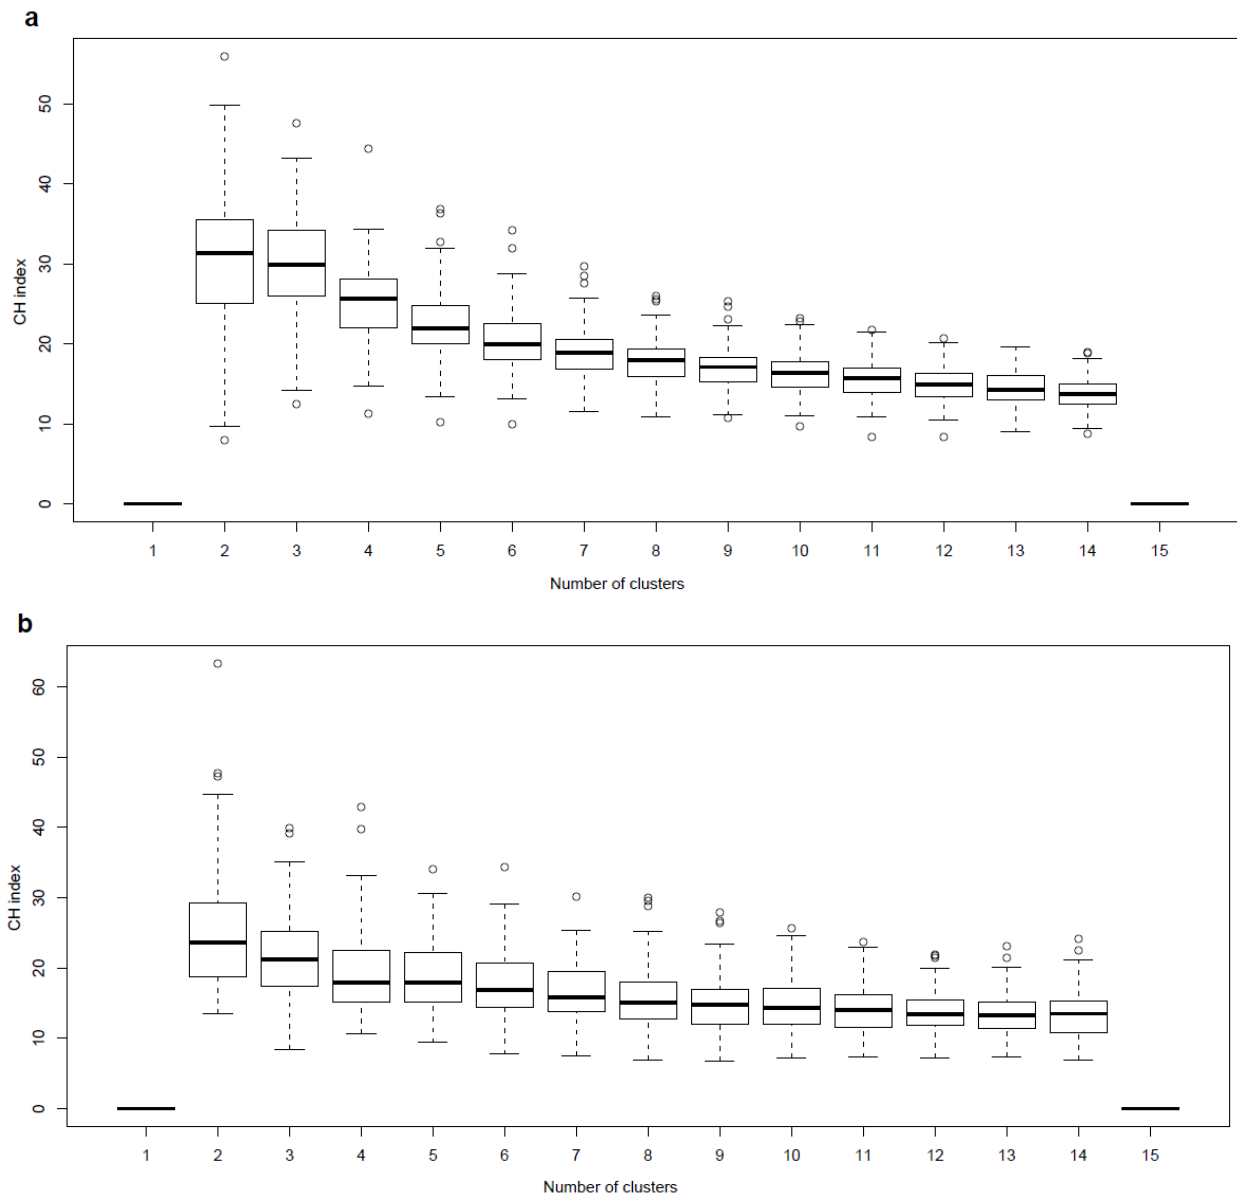

**Supplementary Figure 26. Estimating the optimal number of clusters using half the samples.** (a) 16S dataset and (b) Illumina dataset. Using only half the samples in each enterotype and estimating the optimal number of clusters using CH-index shows that two clusters are preferred over 3 clusters. CH index curves for the two datasets from Supplementary Figure 3 are not flatter than the curves here. Boxplots correspond to the CH index values from 1000 replicates of 50% subsampled datasets.

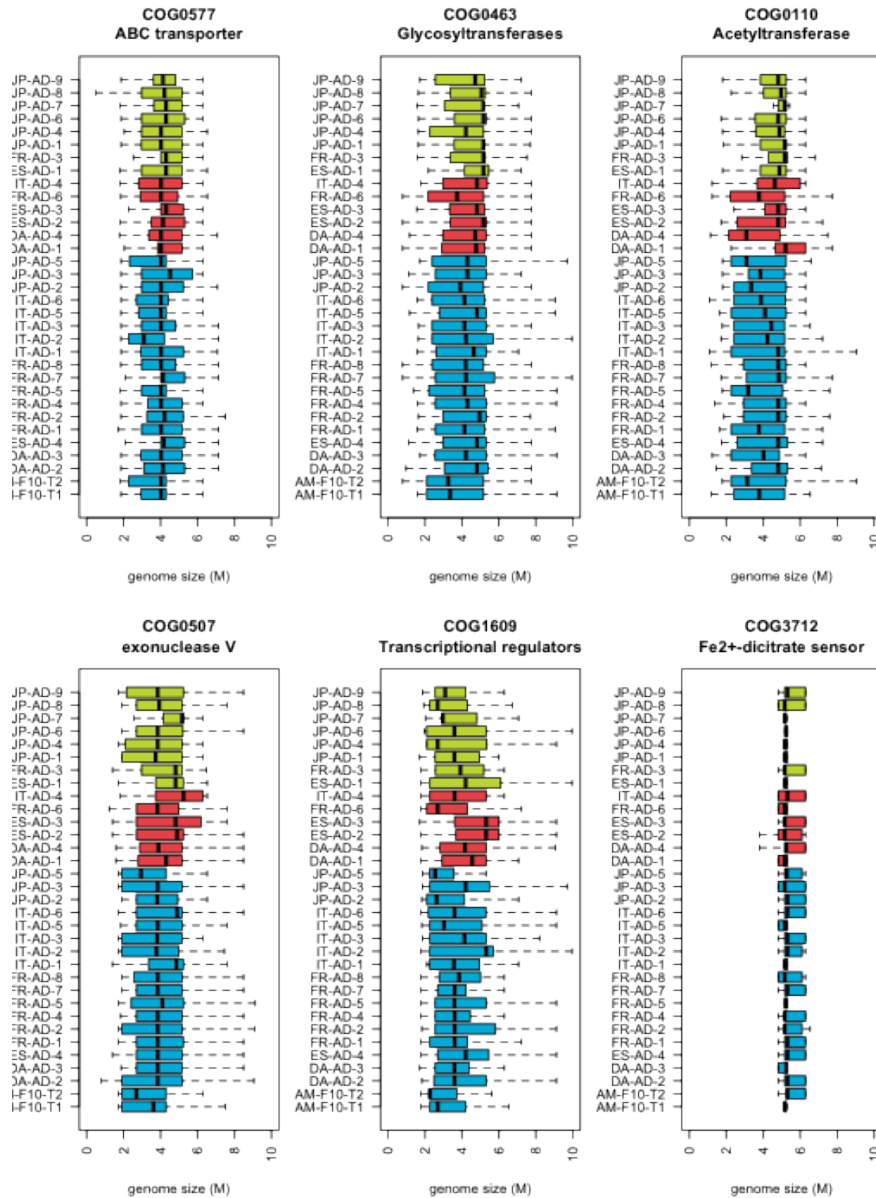

**Supplementary Figure 27. Effect of genome size in abundance of orthologous groups.**

We checked the genome size distributions for 2 COGs which are over-represented in each enterotype (left:1, center:2, right:3). Horizontal axis represents the estimated size of genome encoding the sequence read assigned to the COG. All COGs have a relatively stable average, suggesting that genome size does not have a major effect on functional abundance.
