# Supplementary material for: Enterotypes of the human gut microbiome
Source: Springer Nature journal article supplement (doi:10.1038/nature09944), 2011-04-19
Supplement: 41586_2011_BFnature09944_MOESM246_ESM.pdf [file 41586_2011_BFnature09944_MOESM246_ESM.pdf]

### Supplementary Table 3. List of 1511 complete and draft microbial genomes used as a reference set.

These were obtained from the National Center for Biological Information (NCBI), Human Microbiome Project<sup>10</sup> (HMP) and Sanger Center<sup>11</sup> (MetaHIT). NCBI taxonomy identifiers reported by the sources are used. Genomes of gut-specific species are marked with an asterisk. Taxonomic classification of these genomes via their 16S rRNA gene sequences using RDP Classifier<sup>39</sup> is provided in the last two columns (minimum length 500bp, minimum confidence threshold 0.8).

| Organism                                         | Genome Size (Mbp) | Source | NCBI taxonomy id | gut-specific? | rdp taxonomic rank | rdp taxon         |
|--------------------------------------------------|-------------------|--------|------------------|---------------|--------------------|-------------------|
| <i>Abiotrophia defectiva</i> ATCC 49176          | 3.48              | HMP    | 592010           |               | genus              | Catonella         |
| <i>Acaryochloris marina</i> MBIC11017            | 6.5               | NCBI   | 329726           |               | class              | Cyanobacteria     |
| <i>Acetobacter pasteurianus</i> IFO 3283-01      | 2.91              | NCBI   | 634452           |               | genus              | Acetobacter       |
| <i>Acholeplasma laidlawii</i> PG-8A              | 1.5               | NCBI   | 441768           |               | genus              | Acholeplasma      |
| <i>Achromobacter piechaudii</i> ATCC 43553       | 6.15              | HMP    | 742159           |               | genus              | Achromobacter     |
| <i>Acidaminococcus fermentans</i> DSM 20731      | 2.33              | NCBI   | 591001           |               | genus              | Acidaminococcus   |
| <i>Acidaminococcus</i> sp. D21                   | 2.24              | HMP    | 563191           | *             | genus              | Acidaminococcus   |
| <i>Acidimicrobium ferrooxidans</i> DSM 10331     | 2.16              | NCBI   | 525909           |               | genus              | Acidimicrobium    |
| <i>Acidiphilium cryptum</i> JF-5                 | 3.39              | NCBI   | 349163           |               | genus              | Acidiphilium      |
| <i>Acidithiobacillus ferrooxidans</i> ATCC 23270 | 2.98              | NCBI   | 243159           |               | genus              | Acidithiobacillus |
| <i>Acidithiobacillus ferrooxidans</i> ATCC 53993 | 2.89              | NCBI   | 380394           |               | genus              | Acidithiobacillus |
| <i>Acidobacterium capsulatum</i> ATCC 51196      | 4.13              | NCBI   | 240015           |               | genus              | Acidobacteria_Gp1 |
| <i>Acidothermus cellulolyticus</i> 11B           | 2.44              | NCBI   | 351607           |               | genus              | Acidothermus      |
| <i>Acidovorax citrulli</i> AAC00-1               | 5.35              | NCBI   | 397945           |               | genus              | Acidovorax        |
| <i>Acidovorax ebreus</i> TPSY                    | 3.8               | NCBI   | 535289           |               | genus              | Diaphorobacter    |
| <i>Acidovorax</i> sp. JS42                       | 4.45              | NCBI   | 232721           |               | genus              | Diaphorobacter    |
| <i>Aciduliprofundum boonei</i> T469              | 1.49              | NCBI   | 439481           |               | order              | Thermoplasmatales |
| <i>Acinetobacter baumannii</i> AB0057            | 4.05              | NCBI   | 480119           |               | genus              | Acinetobacter     |
| <i>Acinetobacter baumannii</i> AB307-0294        | 3.76              | NCBI   | 557600           |               | genus              | Acinetobacter     |
| <i>Acinetobacter baumannii</i> ACICU             | 3.9               | NCBI   | 405416           |               | genus              | Acinetobacter     |
| <i>Acinetobacter baumannii</i> ATCC 17978        | 3.98              | NCBI   | 400667           |               | genus              | Acinetobacter     |
| <i>Acinetobacter baumannii</i> ATCC 19606        | 3.97              | HMP    | 575584           |               | genus              | Acinetobacter     |
| <i>Acinetobacter baumannii</i> AYE               | 3.94              | NCBI   | 509173           |               | genus              | Acinetobacter     |
| <i>Acinetobacter baumannii</i> SDF               | 3.42              | NCBI   | 509170           |               | genus              | Acinetobacter     |
| <i>Acinetobacter calcoaceticus</i> RUH2202       | 3.88              | HMP    | 575585           |               | genus              | Acinetobacter     |
| <i>Acinetobacter haemolyticus</i> ATCC 19194     | 3.72              | HMP    | 707232           |               | genus              | Acinetobacter     |
| <i>Acinetobacter johnsonii</i> SH046             | 3.69              | HMP    | 575586           |               | genus              | Acinetobacter     |
| <i>Acinetobacter junii</i> SH205                 | 3.46              | HMP    | 575587           | *             | genus              | Acinetobacter     |
| <i>Acinetobacter lwoffii</i> SH145               | 3.48              | HMP    | 575588           |               | genus              | Acinetobacter     |

|                                                                             |      |         |        |   |       |                  |
|-----------------------------------------------------------------------------|------|---------|--------|---|-------|------------------|
| <i>Acinetobacter radioresistens</i> SH164                                   | 3.16 | HMP     | 575589 | * | genus | Acinetobacter    |
| <i>Acinetobacter radioresistens</i> SK82                                    | 3.1  | HMP     | 596318 | * | genus | Acinetobacter    |
| <i>Acinetobacter</i> sp. 6013113                                            | 4.01 | HMP     | 592014 |   | genus | Acinetobacter    |
| <i>Acinetobacter</i> sp. 6013150                                            | 4.01 | HMP     | 525243 |   | genus | Acinetobacter    |
| <i>Acinetobacter</i> sp. 6014059                                            | 3.87 | HMP     | 525242 |   | genus | Acinetobacter    |
| <i>Acinetobacter</i> sp. ADP1                                               | 3.6  | NCBI    | 62977  |   | genus | Acinetobacter    |
| <i>Acinetobacter</i> sp. ATCC 27244                                         | 3.43 | HMP     | 525244 |   | genus | Acinetobacter    |
| <i>Acinetobacter</i> sp. DR1                                                | 4.15 | NCBI    | 436717 |   | genus | Acinetobacter    |
| <i>Acinetobacter</i> sp. RUH2624                                            | 3.87 | HMP     | 575564 |   | genus | Acinetobacter    |
| <i>Acinetobacter</i> sp. SH024                                              | 3.97 | HMP     | 575565 |   | genus | Acinetobacter    |
| <i>Actinobacillus pleuropneumoniae</i> L20                                  | 2.27 | NCBI    | 416269 |   | genus | Actinobacillus   |
| <i>Actinobacillus pleuropneumoniae</i> serovar 3 str. JL03                  | 2.24 | NCBI    | 434271 |   | genus | Actinobacillus   |
| <i>Actinobacillus pleuropneumoniae</i> serovar 7 str. AP76                  | 2.33 | NCBI    | 537457 |   | genus | Actinobacillus   |
| <i>Actinobacillus succinogenes</i> 130Z                                     | 2.32 | NCBI    | 339671 | * | genus | Actinobacillus   |
| <i>Actinomyces coleocanis</i> DSM 15436                                     | 1.72 | HMP     | 525245 |   | genus | Actinomyces      |
| <i>Actinomyces odontolyticus</i> ATCC 17982                                 | 2.39 | HMP     | 411466 | * | genus | Actinomyces      |
| <i>Actinomyces odontolyticus</i> F0309                                      | 2.43 | HMP     | 649742 | * | genus | Actinomyces      |
| <i>Actinomyces</i> sp. oral taxon 848 str. F0332                            | 2.52 | HMP     | 649743 |   | order | Actinomycetales  |
| <i>Actinomyces urogenitalis</i> DSM 15434                                   | 2.7  | HMP     | 525246 |   | genus | Actinomyces      |
| <i>Actinosynnema mirum</i> DSM 43827                                        | 8.25 | NCBI    | 446462 |   | genus | Actinosynnema    |
| <i>Aerococcus viridans</i> ATCC 11563                                       | 2.01 | HMP     | 655812 |   | genus | Aerococcus       |
| <i>Aeromicrobium marinum</i> DSM 15272                                      | 3.09 | HMP     | 585531 |   | genus | Aeromicrobium    |
| <i>Aeromonas hydrophila</i> subsp. <i>hydrophila</i> ATCC 7966              | 4.74 | NCBI    | 380703 |   | genus | Aeromonas        |
| <i>Aeromonas salmonicida</i> subsp. <i>salmonicida</i> A449                 | 4.7  | NCBI    | 382245 |   | genus | Aeromonas        |
| <i>Aeropyrum pernix</i> K1                                                  | 1.67 | NCBI    | 272557 |   | genus | Aeropyrum        |
| <i>Aggregatibacter actinomycetemcomitans</i> D11S-1                         | 2.11 | NCBI    | 668336 |   | genus | Aggregatibacter  |
| <i>Aggregatibacter aphrophilus</i> NJ8700                                   | 2.31 | NCBI    | 634176 |   | genus | Aggregatibacter  |
| <i>Agrobacterium radiobacter</i> K84                                        | 6.66 | NCBI    | 311403 |   | genus | Rhizobium        |
| <i>Agrobacterium tumefaciens</i> str. C58                                   | 4.92 | NCBI    | 176299 |   | genus | Rhizobium        |
| <i>Agrobacterium vitis</i> S4                                               | 5.01 | NCBI    | 311402 |   | genus | Rhizobium        |
| <i>Akkermansia muciniphila</i> ATCC BAA-835                                 | 2.66 | NCBI    | 349741 | * | genus | Akkermansia      |
| <i>Alcanivorax borkumensis</i> SK2                                          | 3.12 | NCBI    | 393595 |   | genus | Alcanivorax      |
| <i>Alicyclobacillus acidocaldarius</i> subsp. <i>acidocaldarius</i> DSM 446 | 3.02 | NCBI    | 521098 |   | genus | Alicyclobacillus |
| <i>Aliivibrio salmonicida</i> LFI1238                                       | 4.53 | NCBI    | 316275 |   | genus | Aliivibrio       |
| <i>Alistipes putredinis</i> DSM 17216                                       | 2.55 | HMP     | 445970 | * | genus | Alistipes        |
| <i>Alistipes shahii</i> WAL 8301                                            | 3.76 | MetaHIT | 717959 | * | genus | Alistipes        |
| <i>Alkalilimnicola ehrlichii</i> MLHE-1                                     | 3.28 | NCBI    | 187272 |   | genus | Alkalilimnicola  |

|                                                      |      |      |        |   |       |                      |
|------------------------------------------------------|------|------|--------|---|-------|----------------------|
| <i>Alkaliphilus metalliredigens</i> QYMF             | 4.93 | NCBI | 293826 |   | genus | Alkaliphilus         |
| <i>Alkaliphilus oremlandii</i> OhILAs                | 3.12 | NCBI | 350688 |   | genus | Alkaliphilus         |
| <i>Allochromatium vinosum</i> DSM 180                | 3.53 | NCBI | 572477 |   | genus | Allochromatium       |
| <i>Alteromonas macleodii</i> 'Deep ecotype'          | 4.41 | NCBI | 314275 |   | genus | Alteromonas          |
| <i>Aminobacterium colombiense</i> DSM 12261          | 1.98 | NCBI | 572547 |   | genus | Aminobacterium       |
| <i>Ammonifex degensii</i> KC4                        | 2.13 | NCBI | 429009 |   | genus | Ammonifex            |
| <i>Anabaena variabilis</i> ATCC 29413                | 6.4  | NCBI | 240292 |   | genus | Cyanobacteria Gpl    |
| <i>Anaerobaculum hydrogeniformans</i> ATCC BAA-1850  | 2.32 | HMP  | 592015 | * | genus | Anaerobaculum        |
| <i>Anaerocellum thermophilum</i> DSM 6725            | 2.92 | NCBI | 521460 |   | genus | Caldicellulosiruptor |
| <i>Anaerococcus hydrogenalis</i> DSM 7454            | 1.89 | HMP  | 561177 | * | genus | Anaerococcus         |
| <i>Anaerococcus lactolyticus</i> ATCC 51172          | 2.21 | HMP  | 525254 |   | genus | Anaerococcus         |
| <i>Anaerococcus prevotii</i> DSM 20548               | 1.88 | NCBI | 525919 |   | genus | Anaerococcus         |
| <i>Anaerococcus tetradius</i> ATCC 35098             | 2.15 | HMP  | 525255 |   | genus | Anaerococcus         |
| <i>Anaerococcus vaginalis</i> ATCC 51170             | 1.89 | HMP  | 655811 |   | genus | Anaerococcus         |
| <i>Anaerofustis stercorihominis</i> DSM 17244        | 2.28 | HMP  | 445971 | * | genus | Anaerofustis         |
| <i>Anaeromyxobacter dehalogenans</i> 2CP-1           | 5.03 | NCBI | 455488 |   | genus | Anaeromyxobacter     |
| <i>Anaeromyxobacter dehalogenans</i> 2CP-C           | 5.01 | NCBI | 290397 |   | genus | Anaeromyxobacter     |
| <i>Anaeromyxobacter</i> sp. Fw109-5                  | 5.28 | NCBI | 404589 |   | genus | Anaeromyxobacter     |
| <i>Anaeromyxobacter</i> sp. K                        | 5.06 | NCBI | 447217 |   | genus | Anaeromyxobacter     |
| <i>Anaerostipes caccae</i> DSM 14662                 | 3.61 | HMP  | 411490 | * | genus | Anaerostipes         |
| <i>Anaerotruncus colihominis</i> DSM 17241           | 3.72 | HMP  | 445972 | * | genus | Anaerotruncus        |
| <i>Anaplasma centrale</i> str. Israel                | 1.21 | NCBI | 574556 |   | genus | Anaplasma            |
| <i>Anaplasma marginale</i> str. Florida              | 1.2  | NCBI | 320483 |   | genus | Anaplasma            |
| <i>Anaplasma marginale</i> str. St. Maries           | 1.2  | NCBI | 234826 |   | genus | Anaplasma            |
| <i>Anaplasma phagocytophilum</i> HZ                  | 1.47 | NCBI | 212042 |   | genus | Anaplasma            |
| <i>Anoxybacillus flavithermus</i> WK1                | 2.85 | NCBI | 491915 |   | genus | Anoxybacillus        |
| <i>Aquifex aeolicus</i> VF5                          | 1.55 | NCBI | 224324 |   | genus | Aquifex              |
| <i>Arcanobacterium haemolyticum</i> DSM 20595        | 1.99 | NCBI | 644284 |   | genus | Arcanobacterium      |
| <i>Archaeoglobus fulgidus</i> DSM 4304               | 2.18 | NCBI | 224325 |   | genus | Archaeoglobus        |
| <i>Archaeoglobus profundus</i> DSM 5631              | 1.56 | NCBI | 572546 |   | genus | Archaeoglobus        |
| <i>Arcobacter butzleri</i> RM4018                    | 2.34 | NCBI | 367737 | * | genus | Arcobacter           |
| <i>Arcobacter nitrofigilis</i> DSM 7299              | 3.19 | NCBI | 572480 |   | genus | Arcobacter           |
| <i>Aromatoleum aromaticum</i> EbN1                   | 4.3  | NCBI | 76114  |   | genus | Azoarcus             |
| <i>Arthrobacter aurescens</i> TC1                    | 4.6  | NCBI | 290340 |   | genus | Arthrobacter         |
| <i>Arthrobacter chlorophenolicus</i> A6              | 4.4  | NCBI | 452863 |   | genus | Arthrobacter         |
| <i>Arthrobacter</i> sp. FB24                         | 4.7  | NCBI | 290399 |   | genus | Arthrobacter         |
| <i>Aster yellows witches'-broom phytoplasma</i> AYWB | 0.71 | NCBI | 322098 |   | genus | Acholeplasma         |
| <i>Atopobium parvulum</i> DSM 20469                  | 1.54 | NCBI | 521095 |   | genus | Atopobium            |
| <i>Atopobium rimae</i> ATCC 49626                    | 1.63 | HMP  | 553184 |   | genus | Atopobium            |

|                                                                   |      |      |        |   |        |                 |
|-------------------------------------------------------------------|------|------|--------|---|--------|-----------------|
| <i>Atopobium vaginae</i> DSM 15829                                | 1.44 | HMP  | 525256 |   | genus  | Atopobium       |
| <i>Azoarcus</i> sp. BH72                                          | 4.38 | NCBI | 62928  |   | genus  | Azoarcus        |
| <i>Azorhizobium caulinodans</i> ORS 571                           | 5.37 | NCBI | 438753 |   | genus  | Azorhizobium    |
| <i>Azospirillum</i> sp. B510                                      | 3.31 | NCBI | 137722 |   | genus  | Azospirillum    |
| <i>Azotobacter vinelandii</i> DJ                                  | 5.37 | NCBI | 322710 |   | genus  | Azotobacter     |
| <i>Bacillus amyloliquefaciens</i> FZB42                           | 3.92 | NCBI | 326423 |   | genus  | Bacillus        |
| <i>Bacillus anthracis</i> str. A0248                              | 5.23 | NCBI | 592021 |   | genus  | Bacillus        |
| <i>Bacillus anthracis</i> str. Ames                               | 5.23 | NCBI | 198094 |   | genus  | Bacillus        |
| <i>Bacillus anthracis</i> str. 'Ames Ancestor'                    | 5.23 | NCBI | 261594 |   | genus  | Bacillus        |
| <i>Bacillus anthracis</i> str. CDC 684                            | 5.23 | NCBI | 568206 |   | genus  | Bacillus        |
| <i>Bacillus anthracis</i> str. Sterne                             | 5.23 | NCBI | 260799 |   | genus  | Bacillus        |
| <i>Bacillus cereus</i> 03BB102                                    | 5.27 | NCBI | 572264 |   | genus  | Bacillus        |
| <i>Bacillus cereus</i> AH187                                      | 5.27 | NCBI | 405534 |   | genus  | Bacillus        |
| <i>Bacillus cereus</i> AH820                                      | 5.3  | NCBI | 405535 |   | genus  | Bacillus        |
| <i>Bacillus cereus</i> ATCC 10987                                 | 5.22 | NCBI | 222523 |   | genus  | Bacillus        |
| <i>Bacillus cereus</i> ATCC 14579                                 | 5.41 | NCBI | 226900 |   | genus  | Bacillus        |
| <i>Bacillus cereus</i> B4264                                      | 5.42 | NCBI | 405532 |   | genus  | Bacillus        |
| <i>Bacillus cereus</i> E33L                                       | 5.3  | NCBI | 288681 |   | genus  | Bacillus        |
| <i>Bacillus cereus</i> G9842                                      | 5.39 | NCBI | 405531 |   | genus  | Bacillus        |
| <i>Bacillus cereus</i> Q1                                         | 5.21 | NCBI | 361100 |   | genus  | Bacillus        |
| <i>Bacillus clausii</i> KSM-K16                                   | 4.3  | NCBI | 66692  |   | genus  | Bacillus        |
| <i>Bacillus cytotoxicus</i> NVH 391-98                            | 4.09 | NCBI | 315749 |   | genus  | Bacillus        |
| <i>Bacillus halodurans</i> C-125                                  | 4.2  | NCBI | 272558 | * | genus  | Bacillus        |
| <i>Bacillus licheniformis</i> ATCC 14580                          | 8.45 | NCBI | 279010 |   | genus  | Bacillus        |
| <i>Bacillus megaterium</i> DSM319                                 | 5.1  | NCBI | 592022 |   | genus  | Bacillus        |
| <i>Bacillus megaterium</i> QM B1551                               | 5.1  | NCBI | 545693 |   | genus  | Bacillus        |
| <i>Bacillus pseudofirmus</i> OF4                                  | 3.86 | NCBI | 398511 |   | genus  | Bacillus        |
| <i>Bacillus pumilus</i> SAFR-032                                  | 3.7  | NCBI | 315750 |   | genus  | Bacillus        |
| <i>Bacillus selenitireducens</i> MLS10                            | 3.59 | NCBI | 439292 |   | genus  | Bacillus        |
| <i>Bacillus subtilis</i> subsp. <i>subtilis</i> str. 168          | 4.22 | NCBI | 224308 |   | genus  | Bacillus        |
| <i>Bacillus thuringiensis</i> BMB171                              | 5.33 | NCBI | 714359 |   | genus  | Bacillus        |
| <i>Bacillus thuringiensis</i> serovar <i>konkukian</i> str. 97-27 | 5.24 | NCBI | 281309 |   | genus  | Bacillus        |
| <i>Bacillus thuringiensis</i> str. Al Hakam                       | 5.26 | NCBI | 412694 |   | genus  | Bacillus        |
| <i>Bacillus tusciae</i> DSM 2912                                  | 3.38 | NCBI | 562970 |   | order  | Bacillales      |
| <i>Bacillus weihenstephanensis</i> KBAB4                          | 5.26 | NCBI | 315730 |   | genus  | Bacillus        |
| <i>Bacteroides caccae</i> ATCC 43185                              | 4.56 | HMP  | 411901 | * | genus  | Bacteroides     |
| <i>Bacteroides capillosus</i> ATCC 29799                          | 1.86 | HMP  | 411467 | * | family | Ruminococcaceae |
| <i>Bacteroides cellulosilyticus</i> DSM 14838                     | 6.87 | HMP  | 537012 | * | genus  | Bacteroides     |
| <i>Bacteroides coprocola</i> DSM 17136                            | 4.3  | HMP  | 470145 | * | genus  | Bacteroides     |
| <i>Bacteroides coprophilus</i> DSM 18228                          | 4.04 | HMP  | 547042 | * | genus  | Bacteroides     |

|                                                                              |      |         |        |   |        |                    |
|------------------------------------------------------------------------------|------|---------|--------|---|--------|--------------------|
| <i>Bacteroides dorei</i> 5_1_36/D4                                           | 5.53 | HMP     | 556260 | * | genus  | Bacteroides        |
| <i>Bacteroides dorei</i> DSM 17855                                           | 5.57 | HMP     | 483217 | * | genus  | Bacteroides        |
| <i>Bacteroides eggerthii</i> DSM 20697                                       | 4.2  | HMP     | 483216 | * | genus  | Bacteroides        |
| <i>Bacteroides finegoldii</i> DSM 17565                                      | 4.89 | HMP     | 483215 | * | genus  | Bacteroides        |
| <i>Bacteroides fragilis</i> 3_1_12                                           | 5.53 | HMP     | 457424 | * | genus  | Bacteroides        |
| <i>Bacteroides fragilis</i> NCTC 9343                                        | 5.21 | NCBI    | 272559 | * | genus  | Bacteroides        |
| <i>Bacteroides fragilis</i> YCH46                                            | 5.28 | NCBI    | 295405 | * | genus  | Bacteroides        |
| <i>Bacteroides intestinalis</i> DSM 17393                                    | 5.46 | HMP     | 471870 | * | genus  | Bacteroides        |
| <i>Bacteroides ovatus</i> ATCC 8483                                          | 6.47 | HMP     | 411476 | * | genus  | Bacteroides        |
| <i>Bacteroides ovatus</i> SD CC 2a                                           | 6.05 | HMP     | 702444 | * | genus  | Bacteroides        |
| <i>Bacteroides ovatus</i> SD CMC 3f                                          | 6.78 | HMP     | 702443 | * | genus  | Bacteroides        |
| <i>Bacteroides pectinophilus</i> ATCC 43243                                  | 3.03 | HMP     | 483218 | * | family | Lachnospiraceae    |
| <i>Bacteroides plebeius</i> DSM 17135                                        | 4.42 | HMP     | 484018 | * | genus  | Bacteroides        |
| <i>Bacteroides</i> sp. 1_1_6                                                 | 6.86 | HMP     | 469586 | * | genus  | Bacteroides        |
| <i>Bacteroides</i> sp. 2_1_16                                                | 5.24 | HMP     | 469587 | * | genus  | Bacteroides        |
| <i>Bacteroides</i> sp. 2_1_22                                                | 6    | HMP     | 469588 | * | genus  | Bacteroides        |
| <i>Bacteroides</i> sp. 2_1_33B                                               | 4.93 | HMP     | 469589 | * | genus  | Parabacteroides    |
| <i>Bacteroides</i> sp. 2_1_7                                                 | 5.18 | HMP     | 457388 | * |        |                    |
| <i>Bacteroides</i> sp. 2_2_4                                                 | 7.09 | HMP     | 469590 | * | genus  | Bacteroides        |
| <i>Bacteroides</i> sp. 3_1_33FAA                                             | 5.42 | HMP     | 457391 | * | genus  | Bacteroides        |
| <i>Bacteroides</i> sp. 3_2_5                                                 | 5.16 | HMP     | 457392 | * | genus  | Bacteroides        |
| <i>Bacteroides</i> sp. 4_3_47FAA                                             | 5.45 | HMP     | 457394 | * | genus  | Bacteroides        |
| <i>Bacteroides</i> sp. 9_1_42FAA                                             | 5.58 | HMP     | 457395 | * | genus  | Bacteroides        |
| <i>Bacteroides</i> sp. D1                                                    | 5.98 | HMP     | 556258 | * | genus  | Bacteroides        |
| <i>Bacteroides</i> sp. D2                                                    | 6.94 | HMP     | 556259 | * | genus  | Bacteroides        |
| <i>Bacteroides</i> sp. D20                                                   | 4.49 | HMP     | 585543 | * | genus  | Bacteroides        |
| <i>Bacteroides stercoris</i> ATCC 43183                                      | 4.01 | HMP     | 449673 | * | genus  | Bacteroides        |
| <i>Bacteroides thetaiotaomicron</i> VPI-5482                                 | 6.26 | NCBI    | 226186 | * | genus  | Bacteroides        |
| <i>Bacteroides uniformis</i>                                                 | 0.01 | NCBI    | 820    | * |        |                    |
| <i>Bacteroides uniformis</i> ATCC 8492                                       | 4.72 | HMP     | 411479 | * | genus  | Bacteroides        |
| <i>Bacteroides vulgatus</i> ATCC 8482                                        | 5.16 | NCBI    | 435590 | * | genus  | Bacteroides        |
| <i>Bacteroides vulgatus</i> PC510                                            | 4.78 | HMP     | 702446 | * | genus  | Bacteroides        |
| <i>Bacteroides xylanisolvens</i> SD CC 1b                                    | 6.06 | HMP     | 702447 | * | genus  | Bacteroides        |
| <i>Bacteroides xylanisolvens</i> XB1A                                        | 5.98 | MetaHIT | 657309 | * |        |                    |
| <i>Bartonella bacilliformis</i> KC583                                        | 1.45 | NCBI    | 360095 |   | genus  | Bartonella         |
| <i>Bartonella grahamii</i> as4aup                                            | 2.34 | NCBI    | 634504 |   | genus  | Bartonella         |
| <i>Bartonella henselae</i> str. Houston-1                                    | 1.93 | NCBI    | 283166 |   | genus  | Bartonella         |
| <i>Bartonella quintana</i> str. Toulouse                                     | 1.58 | NCBI    | 283165 |   | genus  | Bartonella         |
| <i>Bartonella tribocorum</i> CIP 105476                                      | 2.62 | NCBI    | 382640 |   | genus  | Bartonella         |
| <i>Baumannia cicadellinicola</i> str. Hc<br>( <i>Homalodisca coagulata</i> ) | 0.69 | NCBI    | 374463 |   | family | Enterobacteriaceae |

|                                                                               |      |         |        |   |       |                  |
|-------------------------------------------------------------------------------|------|---------|--------|---|-------|------------------|
| <i>Bdellovibrio bacteriovorus</i> HD100                                       | 3.78 | NCBI    | 264462 |   | genus | Bdellovibrio     |
| <i>Beijerinckia indica</i> subsp. <i>indica</i> ATCC 9039                     | 4.17 | NCBI    | 395963 |   | genus | Beijerinckia     |
| <i>Beutenbergia cavernae</i> DSM 12333                                        | 4.67 | NCBI    | 471853 |   | genus | Beutenbergia     |
| <i>Bifidobacterium adolescentis</i> ATCC 15703                                | 2.09 | NCBI    | 367928 | * | genus | Bifidobacterium  |
| <i>Bifidobacterium adolescentis</i> L2-32                                     | 2.39 | HMP     | 411481 | * | genus | Bifidobacterium  |
| <i>Bifidobacterium angulatum</i> DSM 20098                                    | 2.01 | HMP     | 518635 | * | genus | Bifidobacterium  |
| <i>Bifidobacterium animalis</i> subsp. <i>lactis</i> AD011                    | 1.93 | NCBI    | 442563 | * | genus | Bifidobacterium  |
| <i>Bifidobacterium animalis</i> subsp. <i>lactis</i> BI-04                    | 1.94 | NCBI    | 580050 | * | genus | Bifidobacterium  |
| <i>Bifidobacterium animalis</i> subsp. <i>lactis</i> DSM 10140                | 1.94 | NCBI    | 555970 | * | genus | Bifidobacterium  |
| <i>Bifidobacterium bifidum</i> NCIMB 41171                                    | 2.2  | HMP     | 398513 | * | genus | Bifidobacterium  |
| <i>Bifidobacterium breve</i> DSM 20213                                        | 2.33 | HMP     | 518634 | * | genus | Bifidobacterium  |
| <i>Bifidobacterium catenulatum</i> DSM 16992                                  | 2.06 | HMP     | 566552 | * | genus | Bifidobacterium  |
| <i>Bifidobacterium dentium</i> ATCC 27678                                     | 2.13 | HMP     | 473819 | * |       |                  |
| <i>Bifidobacterium dentium</i> Bd1                                            | 2.64 | NCBI    | 401473 | * | genus | Bifidobacterium  |
| <i>Bifidobacterium gallicum</i> DSM 20093                                     | 2.02 | HMP     | 561180 | * | genus | Bifidobacterium  |
| <i>Bifidobacterium longum</i> DJO10A                                          | 2.38 | NCBI    | 205913 | * | genus | Bifidobacterium  |
| <i>Bifidobacterium longum</i> NCC2705                                         | 2.26 | NCBI    | 206672 | * | genus | Bifidobacterium  |
| <i>Bifidobacterium longum</i> subsp. <i>infantis</i> ATCC 15697               | 2.83 | NCBI    | 391904 | * | genus | Bifidobacterium  |
| <i>Bifidobacterium longum</i> subsp. <i>infantis</i> ATCC 55813               | 2.4  | HMP     | 548480 | * | genus | Bifidobacterium  |
| <i>Bifidobacterium longum</i> subsp. <i>infantis</i> CCUG 52486               | 2.48 | HMP     | 537937 | * | genus | Bifidobacterium  |
| <i>Bifidobacterium longum</i> subsp. <i>longum</i> F8                         | 2.38 | MetaHIT | 722911 | * | genus | Bifidobacterium  |
| <i>Bifidobacterium longum</i> subsp. <i>longum</i> JDM301                     | 2.48 | NCBI    | 759350 | * | genus | Bifidobacterium  |
| <i>Bifidobacterium pseudocatenulatum</i> DSM 20438                            | 2.3  | HMP     | 547043 | * | genus | Bifidobacterium  |
| <i>Blattabacterium</i> sp. ( <i>Blattella germanica</i> ) str. <i>Bge</i>     | 0.64 | NCBI    | 331104 |   | order | Flavobacteriales |
| <i>Blattabacterium</i> sp. ( <i>Periplaneta americana</i> ) str. <i>BPLAN</i> | 0.64 | NCBI    | 600809 |   | order | Flavobacteriales |
| <i>Blautia hansenii</i> DSM 20583                                             | 3.06 | HMP     | 537007 | * | genus | Blautia          |
| <i>Blautia hydrogenotrophica</i> DSM 10507                                    | 3.63 | HMP     | 476272 | * | genus | Blautia          |
| <i>Bordetella avium</i> 197N                                                  | 3.73 | NCBI    | 360910 |   | genus | Bordetella       |
| <i>Bordetella bronchiseptica</i> RB50                                         | 5.34 | NCBI    | 257310 |   | genus | Bordetella       |
| <i>Bordetella parapertussis</i> 12822                                         | 4.77 | NCBI    | 257311 |   | genus | Bordetella       |
| <i>Bordetella pertussis</i> Tohama I                                          | 4.09 | NCBI    | 257313 |   | genus | Bordetella       |
| <i>Bordetella petrii</i> DSM 12804                                            | 5.29 | NCBI    | 340100 |   | genus | Bordetella       |
| <i>Borrelia afzelii</i> PKo                                                   | 0.91 | NCBI    | 390236 |   | genus | Borrelia         |
| <i>Borrelia burgdorferi</i> B31                                               | 0.91 | NCBI    | 224326 |   | genus | Borrelia         |
| <i>Borrelia burgdorferi</i> Z57                                               | 0.91 | NCBI    | 445985 |   | genus | Borrelia         |
| <i>Borrelia duttonii</i> Ly                                                   | 0.93 | NCBI    | 412419 |   | genus | Borrelia         |

|                                                                    |      |      |        |   |        |                    |
|--------------------------------------------------------------------|------|------|--------|---|--------|--------------------|
| <i>Borrelia garinii</i> PBI                                        | 0.9  | NCBI | 290434 |   | genus  | Borrelia           |
| <i>Borrelia hermsii</i> DAH                                        | 0.92 | NCBI | 314723 |   | genus  | Borrelia           |
| <i>Borrelia recurrentis</i> A1                                     | 0.93 | NCBI | 412418 |   | genus  | Borrelia           |
| <i>Borrelia turicatae</i> 91E135                                   | 0.92 | NCBI | 314724 |   | genus  | Borrelia           |
| <i>Brachybacterium faecium</i> DSM 4810                            | 3.61 | NCBI | 446465 |   | genus  | Brachybacterium    |
| <i>Brachyspira hyodysenteriae</i> WA1                              | 3    | NCBI | 565034 |   | genus  | Brachyspira        |
| <i>Brachyspira murdochii</i> DSM 12563                             | 3.24 | NCBI | 526224 |   | genus  | Brachyspira        |
| <i>Bradyrhizobium japonicum</i> USDA 110                           | 9.11 | NCBI | 224911 |   | genus  | Bradyrhizobium     |
| <i>Bradyrhizobium</i> sp. BTAi1                                    | 8.26 | NCBI | 288000 |   | genus  | Bradyrhizobium     |
| <i>Bradyrhizobium</i> sp. ORS278                                   | 7.46 | NCBI | 114615 |   | genus  | Bradyrhizobium     |
| <i>Brevibacillus brevis</i> NBRC 100599                            | 6.3  | NCBI | 358681 |   | genus  | Brevibacillus      |
| <i>Brevibacterium mcbrellneri</i> ATCC 49030                       | 2.56 | HMP  | 585530 |   | genus  | Brevibacterium     |
| <i>Brucella abortus</i> bv. 1 str. 9-941                           | 3.29 | NCBI | 262698 |   | genus  | Brucella           |
| <i>Brucella abortus</i> S19                                        | 3.28 | NCBI | 430066 |   | genus  | Brucella           |
| <i>Brucella canis</i> ATCC 23365                                   | 3.31 | NCBI | 483179 |   | genus  | Brucella           |
| <i>Brucella melitensis</i> ATCC 23457                              | 3.31 | NCBI | 546272 |   | genus  | Brucella           |
| <i>Brucella melitensis</i> biovar Abortus 2308                     | 3.28 | NCBI | 359391 |   | genus  | Brucella           |
| <i>Brucella melitensis</i> bv. 1 str. 16M                          | 3.29 | NCBI | 224914 |   | genus  | Brucella           |
| <i>Brucella microti</i> CCM 4915                                   | 3.34 | NCBI | 568815 |   | genus  | Brucella           |
| <i>Brucella ovis</i> ATCC 25840                                    | 3.28 | NCBI | 444178 |   | genus  | Brucella           |
| <i>Brucella suis</i> 1330                                          | 3.32 | NCBI | 204722 |   | genus  | Brucella           |
| <i>Brucella suis</i> ATCC 23445                                    | 3.32 | NCBI | 470137 |   | genus  | Brucella           |
| <i>Bryantella formatexigens</i> DSM 14469                          | 4.55 | HMP  | 478749 | * | genus  | Marvinbryantia     |
| <i>Buchnera aphidicola</i> str. 5A ( <i>Acyrtosiphon pisum</i> )   | 0.64 | NCBI | 563178 |   | family | Enterobacteriaceae |
| <i>Buchnera aphidicola</i> str. APS ( <i>Acyrtosiphon pisum</i> )  | 0.64 | NCBI | 107806 |   | family | Enterobacteriaceae |
| <i>Buchnera aphidicola</i> str. Bp ( <i>Baizongia pistaciae</i> )  | 0.62 | NCBI | 224915 |   | family | Enterobacteriaceae |
| <i>Buchnera aphidicola</i> str. Cc ( <i>Cinara cedri</i> )         | 0.42 | NCBI | 372461 |   | family | Enterobacteriaceae |
| <i>Buchnera aphidicola</i> str. Sg ( <i>Schizaphis graminum</i> )  | 0.64 | NCBI | 198804 |   | family | Enterobacteriaceae |
| <i>Buchnera aphidicola</i> str. Tuc7 ( <i>Acyrtosiphon pisum</i> ) | 0.64 | NCBI | 561501 |   | family | Enterobacteriaceae |
| <i>Bulleidia extracta</i> W1219                                    | 1.42 | HMP  | 679192 |   | genus  | Bulleidia          |
| <i>Burkholderia ambifaria</i> AMMD                                 | 7.48 | NCBI | 339670 |   | genus  | Burkholderia       |
| <i>Burkholderia ambifaria</i> MC40-6                               | 7.34 | NCBI | 398577 |   | genus  | Burkholderia       |
| <i>Burkholderia cenocepacia</i> AU 1054                            | 7.28 | NCBI | 331271 |   | genus  | Burkholderia       |
| <i>Burkholderia cenocepacia</i> HI2424                             | 7.54 | NCBI | 331272 |   | genus  | Burkholderia       |
| <i>Burkholderia cenocepacia</i> J2315                              | 7.96 | NCBI | 216591 |   | genus  | Burkholderia       |
| <i>Burkholderia cenocepacia</i> MC0-3                              | 7.97 | NCBI | 406425 |   | genus  | Burkholderia       |
| <i>Burkholderia glumae</i> BGR1                                    | 6.73 | NCBI | 626418 |   | genus  | Burkholderia       |
| <i>Burkholderia mallei</i> ATCC 23344                              | 5.84 | NCBI | 243160 |   | genus  | Burkholderia       |

|                                                                      |       |         |        |   |        |                      |
|----------------------------------------------------------------------|-------|---------|--------|---|--------|----------------------|
| <i>Burkholderia mallei</i> NCTC 10229                                | 5.74  | NCBI    | 412022 |   | genus  | Burkholderia         |
| <i>Burkholderia mallei</i> NCTC 10247                                | 5.85  | NCBI    | 320389 |   | genus  | Burkholderia         |
| <i>Burkholderia mallei</i> SAVP1                                     | 5.23  | NCBI    | 320388 |   | genus  | Burkholderia         |
| <i>Burkholderia multivorans</i> ATCC 17616                           | 13.68 | NCBI    | 395019 |   | genus  | Burkholderia         |
| <i>Burkholderia phymatum</i> STM815                                  | 6.18  | NCBI    | 391038 |   | genus  | Burkholderia         |
| <i>Burkholderia phytofirmans</i> PsJN                                | 8.09  | NCBI    | 398527 |   | genus  | Burkholderia         |
| <i>Burkholderia pseudomallei</i> 1106a                               | 7.09  | NCBI    | 357348 |   | genus  | Burkholderia         |
| <i>Burkholderia pseudomallei</i> 1710b                               | 7.31  | NCBI    | 320372 |   | genus  | Burkholderia         |
| <i>Burkholderia pseudomallei</i> 668                                 | 7.04  | NCBI    | 320373 |   | genus  | Burkholderia         |
| <i>Burkholderia pseudomallei</i> K96243                              | 7.25  | NCBI    | 272560 |   | genus  | Burkholderia         |
| <i>Burkholderia pseudomallei</i> MSHR346                             | 4.1   | NCBI    | 536230 |   | genus  | Burkholderia         |
| <i>Burkholderia</i> sp. 383                                          | 8.68  | NCBI    | 269483 |   | genus  | Burkholderia         |
| <i>Burkholderia</i> sp. CCGE1002                                     | 7.4   | NCBI    | 640511 |   | genus  | Burkholderia         |
| <i>Burkholderia thailandensis</i> E264                               | 6.72  | NCBI    | 271848 |   | genus  | Burkholderia         |
| <i>Burkholderia vietnamiensis</i> G4                                 | 7.31  | NCBI    | 269482 |   | genus  | Burkholderia         |
| <i>Burkholderia xenovorans</i> LB400                                 | 9.73  | NCBI    | 266265 |   | genus  | Burkholderia         |
| butyrate-producing bacterium SM4/1                                   | 3.11  | MetaHIT | 245012 | * | family | Lachnospiraceae      |
| butyrate-producing bacterium SS3/4                                   | 3.6   | MetaHIT | 245014 |   |        |                      |
| butyrate-producing bacterium SSC/2                                   | 3.11  | MetaHIT | 245018 | * | genus  | Anaerostipes         |
| <i>Butyrivibrio crossotus</i> DSM 2876                               | 2.5   | HMP     | 511680 | * | family | Lachnospiraceae      |
| <i>Butyrivibrio fibrisolvens</i> 16/4                                | 3.16  | MetaHIT | 657324 | * |        |                      |
| <i>Caldicellulosiruptor saccharolyticus</i> DSM 8903                 | 2.97  | NCBI    | 351627 |   | genus  | Caldicellulosiruptor |
| <i>Caldivirga maquilingensis</i> IC-167                              | 2.08  | NCBI    | 397948 |   | genus  | Caldivirga           |
| <i>Campylobacter concisus</i> 13826                                  | 2.05  | NCBI    | 360104 |   | genus  | Campylobacter        |
| <i>Campylobacter curvus</i> 525.92                                   | 1.97  | NCBI    | 360105 |   | genus  | Campylobacter        |
| <i>Campylobacter fetus</i> subsp. <i>fetus</i> 82-40                 | 1.77  | NCBI    | 360106 |   | genus  | Campylobacter        |
| <i>Campylobacter gracilis</i> RM3268                                 | 2.26  | HMP     | 553220 |   | genus  | Campylobacter        |
| <i>Campylobacter hominis</i> ATCC BAA-381                            | 1.71  | NCBI    | 360107 |   | genus  | Campylobacter        |
| <i>Campylobacter jejuni</i> RM1221                                   | 1.78  | NCBI    | 195099 |   | genus  | Campylobacter        |
| <i>Campylobacter jejuni</i> subsp. <i>doylei</i> 269.97              | 1.85  | NCBI    | 360109 |   | genus  | Campylobacter        |
| <i>Campylobacter jejuni</i> subsp. <i>jejuni</i> 81116               | 1.63  | NCBI    | 407148 |   | genus  | Campylobacter        |
| <i>Campylobacter jejuni</i> subsp. <i>jejuni</i> 81-176              | 1.62  | NCBI    | 354242 |   | genus  | Campylobacter        |
| <i>Campylobacter jejuni</i> subsp. <i>jejuni</i> NCTC 11168          | 1.64  | NCBI    | 192222 |   | genus  | Campylobacter        |
| <i>Campylobacter lari</i> RM2100                                     | 1.53  | NCBI    | 306263 |   | genus  | Campylobacter        |
| <i>Campylobacter rectus</i> RM3267                                   | 2.51  | HMP     | 553218 |   | genus  | Campylobacter        |
| <i>Campylobacter showae</i> RM3277                                   | 2.07  | HMP     | 553219 |   | genus  | Campylobacter        |
| <i>Candidatus Accumolibacter phosphatis</i> clade IIA str. UW-1      | 5.06  | NCBI    | 522306 |   | genus  | Propionivibrio       |
| <i>Candidatus Amoebophilus asiaticus</i> 5a2                         | 1.88  | NCBI    | 452471 |   | order  | Sphingobacteriales   |
| <i>Candidatus Azobacteroides pseudotrichonymphae</i> genomovar. CFP2 | 1.11  | NCBI    | 511995 |   | family | Porphyromonadaceae   |

|                                                                              |       |      |        |   |        |                               |
|------------------------------------------------------------------------------|-------|------|--------|---|--------|-------------------------------|
| <i>Candidatus Blochmannia floridanus</i>                                     | 0.71  | NCBI | 203907 |   | family | Enterobacteriaceae            |
| <i>Candidatus Blochmannia pennsylvanicus</i> str. BPEN                       | 0.79  | NCBI | 291272 |   | genus  | Sodalis                       |
| <i>Candidatus Carsonella ruddii</i> PV                                       | 0.16  | NCBI | 387662 |   | phylum | Proteobacteria                |
| <i>Candidatus Cloacamonas acidaminovorans</i>                                | 2.25  | NCBI | 456827 |   | domain | Bacteria                      |
| <i>Candidatus Desulforudis audaxviator</i> MP104C                            | 2.35  | NCBI | 477974 |   | family | Thermoanaerobacteraceae       |
| <i>Candidatus Hamiltonella defensa</i> 5AT ( <i>Acyrtosiphon pisum</i> )     | 2.11  | NCBI | 572265 |   | family | Enterobacteriaceae            |
| <i>Candidatus Hodgkinia cicadicola</i> Dsem                                  | 0.14  | NCBI | 573234 |   | class  | Alphaproteobacteria           |
| <i>Candidatus Korarchaeum cryptofilum</i> OPF8                               | 1.59  | NCBI | 374847 |   | genus  | <i>Candidatus Korarchaeum</i> |
| <i>Candidatus Koribacter versatilis</i> Ellin345                             | 5.65  | NCBI | 204669 |   | genus  | Acidobacteria_Gp1             |
| <i>Candidatus Liberibacter asiaticus</i> str. psy62                          | 1.23  | NCBI | 537021 |   | order  | Rhizobiales                   |
| <i>Candidatus Methanoregula boonei</i> 6A8                                   | 2.54  | NCBI | 456442 |   | order  | Methanomicrobiales            |
| <i>Candidatus Pelagibacter ubique</i> HTCC1062                               | 1.31  | NCBI | 335992 |   | genus  | Pelagibacter                  |
| <i>Candidatus Phytoplasma australiense</i>                                   | 0.88  | NCBI | 59748  |   | genus  | Acholeplasma                  |
| <i>Candidatus Phytoplasma mali</i>                                           | 0.6   | NCBI | 37692  |   | genus  | Acholeplasma                  |
| <i>Candidatus Protochlamydia amoebophila</i> UWE25                           | 2.41  | NCBI | 264201 |   | genus  | Parachlamydia                 |
| <i>Candidatus Puniceispirillum marinum</i> IMCC1322                          | 2.75  | NCBI | 488538 |   | family | Rhodospirillaceae             |
| <i>Candidatus Riesia pediculicola</i> USDA                                   | 0.57  | NCBI | 515618 |   | genus  | Arsenophonus                  |
| <i>Candidatus Ruthia magnifica</i> str. Cm ( <i>Calyptogenia magnifica</i> ) | 1.16  | NCBI | 413404 |   | class  | Gammaproteobacteria           |
| <i>Candidatus Solibacter usitatus</i> Ellin6076                              | 9.97  | NCBI | 234267 |   | genus  | Acidobacteria_Gp3             |
| <i>Candidatus Sulcia muelleri</i> DMIN                                       | 0.24  | NCBI | 641892 |   | order  | Flavobacteriales              |
| <i>Candidatus Sulcia muelleri</i> GWSS                                       | 0.25  | NCBI | 444179 |   | order  | Flavobacteriales              |
| <i>Candidatus Sulcia muelleri</i> SMDSEM                                     | 0.28  | NCBI | 595499 |   | order  | Flavobacteriales              |
| <i>Candidatus Vesicomysocius okutanii</i> HA                                 | 1.02  | NCBI | 412965 |   | class  | Gammaproteobacteria           |
| <i>Capnocytophaga gingivalis</i> ATCC 33624                                  | 2.67  | HMP  | 553178 |   | genus  | Capnocytophaga                |
| <i>Capnocytophaga ochracea</i> DSM 7271                                      | 2.61  | NCBI | 521097 |   | genus  | Capnocytophaga                |
| <i>Capnocytophaga sputigena</i> ATCC 33612                                   | 3     | HMP  | 553177 |   | genus  | Capnocytophaga                |
| <i>Carboxydotherrmus hydrogenoformans</i> Z-2901                             | 2.4   | NCBI | 246194 |   | genus  | Carboxydotherrmus             |
| <i>Cardiobacterium hominis</i> ATCC 15826                                    | 2.64  | HMP  | 638300 |   | genus  | Cardiobacterium               |
| <i>Catenibacterium mitsuokai</i> DSM 15897                                   | 2.67  | HMP  | 451640 | * | genus  | Catenibacterium               |
| <i>Catenulispora acidiphila</i> DSM 44928                                    | 10.47 | NCBI | 479433 |   | genus  | Catenulispora                 |
| <i>Catonella morbi</i> ATCC 51271                                            | 2.04  | HMP  | 592026 |   | genus  | Abiotrophia                   |
| <i>Caulobacter crescentus</i> CB15                                           | 4.02  | NCBI | 190650 |   | genus  | Caulobacter                   |
| <i>Caulobacter crescentus</i> NA1000                                         | 4.04  | NCBI | 565050 |   | genus  | Caulobacter                   |
| <i>Caulobacter segnis</i> ATCC 21756                                         | 4.66  | NCBI | 509190 |   | genus  | Caulobacter                   |
| <i>Caulobacter</i> sp. K31                                                   | 5.48  | NCBI | 366602 |   | genus  | Caulobacter                   |
| <i>Cellulomonas flavigena</i> DSM 20109                                      | 4.12  | NCBI | 446466 |   | genus  | Cellulomonas                  |

|                                                                           |      |      |        |   |        |                    |
|---------------------------------------------------------------------------|------|------|--------|---|--------|--------------------|
| <i>Cellvibrio japonicus</i> Ueda107                                       | 4.58 | NCBI | 498211 |   | genus  | Cellvibrio         |
| <i>Cenarchaeum symbiosum</i> A unordered<br>unplaced scaffolds            | 2.05 | NCBI | 414004 |   | class  | Thermoprotei       |
| <i>Chelativorans</i> sp. BNC1                                             | 4.41 | NCBI | 266779 |   | family | Phyllobacteriaceae |
| <i>Chitinophaga pinensis</i> DSM 2588                                     | 9.13 | NCBI | 485918 |   | genus  | Chitinophaga       |
| <i>Chlamydia muridarum</i> Nigg                                           | 1.07 | NCBI | 243161 |   | genus  | Chlamydia          |
| <i>Chlamydia trachomatis</i> 434/Bu                                       | 1.04 | NCBI | 471472 |   | genus  | Chlamydia          |
| <i>Chlamydia trachomatis</i> A/HAR-13                                     | 1.04 | NCBI | 315277 |   | genus  | Chlamydia          |
| <i>Chlamydia trachomatis</i> B/Jali20/OT                                  | 1.04 | NCBI | 580049 |   | genus  | Chlamydia          |
| <i>Chlamydia trachomatis</i> B/TZ1A828/OT                                 | 1.04 | NCBI | 672161 |   | genus  | Chlamydia          |
| <i>Chlamydia trachomatis</i> D/UW-3/CX                                    | 1.04 | NCBI | 272561 |   | genus  | Chlamydia          |
| <i>Chlamydia trachomatis</i> L2b/UCH-1/proctitis                          | 1.04 | NCBI | 471473 |   | genus  | Chlamydia          |
| <i>Chlamydophila abortus</i> S26/3                                        | 1.14 | NCBI | 218497 |   | genus  | Chlamydophila      |
| <i>Chlamydophila caviae</i> GPIC                                          | 1.17 | NCBI | 227941 |   | genus  | Chlamydophila      |
| <i>Chlamydophila felis</i> Fe/C-56                                        | 1.17 | NCBI | 264202 |   | genus  | Chlamydophila      |
| <i>Chlamydophila pneumoniae</i> AR39                                      | 1.23 | NCBI | 115711 |   | genus  | Chlamydophila      |
| <i>Chlamydophila pneumoniae</i> CWL029                                    | 1.23 | NCBI | 115713 |   | genus  | Chlamydophila      |
| <i>Chlamydophila pneumoniae</i> J138                                      | 1.23 | NCBI | 138677 |   | genus  | Chlamydophila      |
| <i>Chlamydophila pneumoniae</i> TW-183                                    | 1.23 | NCBI | 182082 |   | genus  | Chlamydophila      |
| <i>Chlorobaculum parvum</i> NCIB 8327                                     | 2.29 | NCBI | 517417 |   | genus  | Chlorobium         |
| <i>Chlorobium chlorochromatii</i> CaD3                                    | 2.57 | NCBI | 340177 |   | genus  | Chlorobium         |
| <i>Chlorobium limicola</i> DSM 245                                        | 2.76 | NCBI | 290315 |   | genus  | Chlorobium         |
| <i>Chlorobium luteolum</i> DSM 273                                        | 2.36 | NCBI | 319225 |   | genus  | Chlorobium         |
| <i>Chlorobium phaeobacteroides</i> BS1                                    | 2.74 | NCBI | 331678 |   | genus  | Prosthecochloris   |
| <i>Chlorobium phaeobacteroides</i> DSM 266                                | 3.13 | NCBI | 290317 |   | genus  | Chlorobium         |
| <i>Chlorobium phaeovibrioides</i> DSM 265                                 | 1.97 | NCBI | 290318 |   | genus  | Chlorobium         |
| <i>Chlorobium tepidum</i> TLS                                             | 2.15 | NCBI | 194439 |   | genus  | Chlorobaculum      |
| <i>Chloroflexus aggregans</i> DSM 9485                                    | 4.68 | NCBI | 326427 |   | genus  | Chloroflexus       |
| <i>Chloroflexus aurantiacus</i> J-10-fl                                   | 5.26 | NCBI | 324602 |   | genus  | Chloroflexus       |
| <i>Chloroflexus</i> sp. Y-400-fl                                          | 5.27 | NCBI | 480224 |   | genus  | Chloroflexus       |
| <i>Chloroherpeton thalassium</i> ATCC 35110                               | 3.29 | NCBI | 517418 |   | genus  | Chloroherpeton     |
| <i>Chromobacterium violaceum</i> ATCC 12472                               | 4.75 | NCBI | 243365 |   | genus  | Chromobacterium    |
| <i>Chromohalobacter salexigens</i> DSM 3043                               | 3.7  | NCBI | 290398 |   | genus  | Chromohalobacter   |
| <i>Chryseobacterium gleum</i> ATCC 35910                                  | 5.58 | HMP  | 525257 |   | genus  | Chryseobacterium   |
| <i>Citrobacter koseri</i> ATCC BAA-895                                    | 4.72 | NCBI | 290338 |   | family | Enterobacteriaceae |
| <i>Citrobacter rodentium</i> ICC168                                       | 5.35 | NCBI | 637910 |   | genus  | Citrobacter        |
| <i>Citrobacter</i> sp. 30_2                                               | 5.13 | HMP  | 469595 | * | genus  | Citrobacter        |
| <i>Citrobacter youngae</i> ATCC 29220                                     | 5.15 | HMP  | 500640 | * | family | Enterobacteriaceae |
| <i>Clavibacter michiganensis</i> subsp.<br><i>michiganensis</i> NCPPB 382 | 3.3  | NCBI | 443906 |   | genus  | Clavibacter        |
| <i>Clavibacter michiganensis</i> subsp. <i>sepedonicus</i>                | 3.26 | NCBI | 31964  |   | genus  | Clavibacter        |

|                                                   |      |         |        |   |        |                       |
|---------------------------------------------------|------|---------|--------|---|--------|-----------------------|
| <i>Clostridiales bacterium 1_7_47FAA</i>          | 6.55 | HMP     | 457421 |   | order  | Clostridiales         |
| <i>Clostridiales genomosp. BVAB3 str. UPII9-5</i> | 3.62 | NCBI    | 699246 |   | genus  | Acetivibrio           |
| <i>Clostridium acetobutylicum ATCC 824</i>        | 3.94 | NCBI    | 272562 |   | genus  | Clostridium           |
| <i>Clostridium asparagiforme DSM 15981</i>        | 6.42 | HMP     | 518636 | * | order  | Clostridiales         |
| <i>Clostridium bartlettii DSM 16795</i>           | 2.97 | HMP     | 445973 | * | genus  | Sporacetigenium       |
| <i>Clostridium beijerinckii NCIMB 8052</i>        | 6    | NCBI    | 290402 |   | genus  | Clostridium           |
| <i>Clostridium bolteae ATCC BAA-613</i>           | 6.56 | HMP     | 411902 | * | order  | Clostridiales         |
| <i>Clostridium botulinum A str. ATCC 19397</i>    | 3.86 | NCBI    | 441770 |   | genus  | Clostridium           |
| <i>Clostridium botulinum A str. ATCC 3502</i>     | 3.89 | NCBI    | 413999 |   | genus  | Clostridium           |
| <i>Clostridium botulinum A str. Hall</i>          | 3.76 | NCBI    | 441771 |   | genus  | Clostridium           |
| <i>Clostridium botulinum A2 str. Kyoto</i>        | 4.16 | NCBI    | 536232 |   | genus  | Clostridium           |
| <i>Clostridium botulinum A3 str. Loch Maree</i>   | 3.99 | NCBI    | 498214 |   | genus  | Clostridium           |
| <i>Clostridium botulinum B str. Eklund 17B</i>    | 3.8  | NCBI    | 508765 |   | genus  | Clostridium           |
| <i>Clostridium botulinum B1 str. Okra</i>         | 3.96 | NCBI    | 498213 |   | genus  | Clostridium           |
| <i>Clostridium botulinum Ba4 str. 657</i>         | 3.98 | NCBI    | 515621 |   | genus  | Clostridium           |
| <i>Clostridium botulinum E3 str. Alaska E43</i>   | 3.66 | NCBI    | 508767 |   | genus  | Clostridium           |
| <i>Clostridium botulinum F str. Langeland</i>     | 4    | NCBI    | 441772 |   | genus  | Clostridium           |
| <i>Clostridium cellulolyticum H10</i>             | 4.07 | NCBI    | 394503 |   | genus  | Acetivibrio           |
| <i>Clostridium cf. saccharolyticum K10</i>        | 3.77 | MetaHIT | 717608 |   | family | Lachnospiraceae       |
| <i>Clostridium difficile 630</i>                  | 4.29 | NCBI    | 272563 | * | family | Peptostreptococcaceae |
| <i>Clostridium difficile CD196</i>                | 4.11 | NCBI    | 645462 | * | family | Peptostreptococcaceae |
| <i>Clostridium difficile NAP07</i>                | 3.91 | HMP     | 525258 | * | family | Peptostreptococcaceae |
| <i>Clostridium difficile NAP08</i>                | 4.08 | HMP     | 525259 | * | family | Peptostreptococcaceae |
| <i>Clostridium difficile R20291</i>               | 4.19 | NCBI    | 645463 | * | family | Peptostreptococcaceae |
| <i>Clostridium hathewayi DSM 13479</i>            | 7.16 | HMP     | 566550 | * |        |                       |
| <i>Clostridium hiranonis DSM 13275</i>            | 2.48 | HMP     | 500633 | * | genus  | Peptostreptococcus    |
| <i>Clostridium hylemonae DSM 15053</i>            | 3.89 | HMP     | 553973 | * |        |                       |
| <i>Clostridium kluveri DSM 555</i>                | 3.96 | NCBI    | 431943 |   | genus  | Clostridium           |
| <i>Clostridium kluveri NBRC 12016</i>             | 3.9  | NCBI    | 583346 |   | genus  | Clostridium           |
| <i>Clostridium leptum DSM 753</i>                 | 3.27 | HMP     | 428125 | * | family | Ruminococcaceae       |
| <i>Clostridium methylpentosum DSM 5476</i>        | 3.48 | HMP     | 537013 | * | family | Ruminococcaceae       |
| <i>Clostridium nexile DSM 1787</i>                | 4    | HMP     | 500632 | * | family | Lachnospiraceae       |
| <i>Clostridium novyi NT</i>                       | 2.55 | NCBI    | 386415 |   | genus  | Clostridium           |
| <i>Clostridium perfringens ATCC 13124</i>         | 3.26 | NCBI    | 195103 | * | genus  | Clostridium           |
| <i>Clostridium perfringens SM101</i>              | 2.9  | NCBI    | 289380 | * | genus  | Clostridium           |
| <i>Clostridium perfringens str. 13</i>            | 3.03 | NCBI    | 195102 | * | genus  | Clostridium           |
| <i>Clostridium phytofermentans ISDg</i>           | 4.85 | NCBI    | 357809 |   | genus  | Anaerosporebacter     |
| <i>Clostridium ramosum DSM 1402</i>               | 3.24 | HMP     | 445974 | * | genus  | Coprobacillus         |
| <i>Clostridium scindens ATCC 35704</i>            | 3.62 | HMP     | 411468 | * | genus  | Dorea                 |
| <i>Clostridium sp. 7_2_43FAA</i>                  | 3.84 | HMP     | 457396 | * | genus  | Clostridium           |
| <i>Clostridium sp. L2-50</i>                      | 2.95 | HMP     | 411489 |   | genus  | Coprococcus           |

|                                                    |      |         |        |   |        |                   |
|----------------------------------------------------|------|---------|--------|---|--------|-------------------|
| <i>Clostridium</i> sp. M62/1                       | 3.84 | HMP     | 411486 |   | family | Lachnospiraceae   |
| <i>Clostridium</i> sp. SS2/1                       | 3.14 | HMP     | 411484 | * | genus  | Anaerostipes      |
| <i>Clostridium</i> spiroforme DSM 1552             | 2.51 | HMP     | 428126 |   | genus  | Coprobacillus     |
| <i>Clostridium</i> sporogenes ATCC 15579           | 4.1  | HMP     | 471871 |   | genus  | Clostridium       |
| <i>Clostridium</i> tetani E88                      | 2.8  | NCBI    | 212717 |   | genus  | Clostridium       |
| <i>Clostridium</i> thermocellum ATCC 27405         | 3.84 | NCBI    | 203119 |   | genus  | Acetivibrio       |
| <i>Collinsella</i> aerofaciens ATCC 25986          | 2.44 | HMP     | 411903 | * | genus  | Collinsella       |
| <i>Collinsella</i> intestinalis DSM 13280          | 1.81 | HMP     | 521003 | * | genus  | Collinsella       |
| <i>Collinsella</i> stercoris DSM 13279             | 2.48 | HMP     | 445975 | * | genus  | Collinsella       |
| <i>Colwellia</i> psychrerythraea 34H               | 5.37 | NCBI    | 167879 |   | genus  | Colwellia         |
| <i>Comamonas</i> testosteroni CNB-2                | 5.37 | NCBI    | 688245 |   | genus  | Comamonas         |
| <i>Conexibacter</i> woesei DSM 14684               | 6.36 | NCBI    | 469383 |   | genus  | Conexibacter      |
| <i>Coprococcus</i> catus GD/7                      | 3.52 | MetaHIT | 717962 | * | genus  | Coprococcus       |
| <i>Coprococcus</i> comes ATCC 27758                | 3.24 | HMP     | 470146 | * | genus  | Coprococcus       |
| <i>Coprococcus</i> eutactus ATCC 27759             | 3.1  | HMP     | 411474 | * | genus  | Coprococcus       |
| <i>Coprococcus</i> sp. ART55/1                     | 3.12 | MetaHIT | 751585 | * | genus  | Coprococcus       |
| <i>Coprothermobacter</i> proteolyticus DSM 5265    | 1.42 | NCBI    | 309798 |   | genus  | Coprothermobacter |
| <i>Coralimargarita</i> akajimensis DSM 45221       | 3.75 | NCBI    | 583355 |   | genus  | Coralimargarita   |
| <i>Corynebacterium</i> accolens ATCC 49725         | 2.44 | HMP     | 525260 |   | genus  | Corynebacterium   |
| <i>Corynebacterium</i> ammoniagenes DSM 20306      | 2.76 | HMP     | 649754 | * | genus  | Corynebacterium   |
| <i>Corynebacterium</i> amycolatum SK46             | 2.51 | HMP     | 553204 |   | genus  | Corynebacterium   |
| <i>Corynebacterium</i> aurimucosum ATCC 700975     | 5.52 | NCBI    | 548476 |   | genus  | Corynebacterium   |
| <i>Corynebacterium</i> diphtheriae NCTC 13129      | 2.49 | NCBI    | 257309 |   | genus  | Corynebacterium   |
| <i>Corynebacterium</i> efficiens YS-314            | 6.34 | NCBI    | 196164 |   | genus  | Corynebacterium   |
| <i>Corynebacterium</i> genitalium ATCC 33030       | 2.36 | HMP     | 585529 |   | genus  | Corynebacterium   |
| <i>Corynebacterium</i> glucuronolyticum ATCC 51866 | 2.88 | HMP     | 548478 |   | genus  | Corynebacterium   |
| <i>Corynebacterium</i> glucuronolyticum ATCC 51867 | 2.81 | HMP     | 548477 |   | genus  | Corynebacterium   |
| <i>Corynebacterium</i> glutamicum ATCC 13032       | 6.59 | NCBI    | 196627 |   | genus  | Corynebacterium   |
| <i>Corynebacterium</i> glutamicum R                | 3.31 | NCBI    | 340322 |   | genus  | Corynebacterium   |
| <i>Corynebacterium</i> jeikeium ATCC 43734         | 2.49 | HMP     | 525262 |   | genus  | Corynebacterium   |
| <i>Corynebacterium</i> jeikeium K411               | 2.46 | NCBI    | 306537 |   | genus  | Corynebacterium   |
| <i>Corynebacterium</i> kroppenstedtii DSM 44385    | 2.45 | NCBI    | 645127 |   | genus  | Corynebacterium   |
| <i>Corynebacterium</i> lipophiloflavum DSM 44291   | 2.39 | HMP     | 525263 |   | genus  | Corynebacterium   |
| <i>Corynebacterium</i> matruchotii ATCC 14266      | 2.85 | HMP     | 553207 |   | genus  | Corynebacterium   |
| <i>Corynebacterium</i> matruchotii ATCC 33806      | 2.99 | HMP     | 566549 |   | genus  | Corynebacterium   |
| <i>Corynebacterium</i> pseudogenitalium ATCC 33035 | 2.63 | HMP     | 525264 |   | genus  | Corynebacterium   |
| <i>Corynebacterium</i> striatum ATCC 6940          | 2.83 | HMP     | 525268 |   | genus  | Corynebacterium   |
| <i>Corynebacterium</i> tuberculostearicum SK141    | 2.37 | HMP     | 553206 |   | genus  | Corynebacterium   |
| <i>Corynebacterium</i> urealyticum DSM 7109        | 2.37 | NCBI    | 504474 |   | genus  | Corynebacterium   |

|                                                     |      |      |        |   |        |                     |
|-----------------------------------------------------|------|------|--------|---|--------|---------------------|
| <i>Coxiella burnetii</i> CbuG_Q212                  | 2.01 | NCBI | 434923 |   | class  | Gammaproteobacteria |
| <i>Coxiella burnetii</i> CbuK_Q154                  | 2.06 | NCBI | 434924 |   | class  | Gammaproteobacteria |
| <i>Coxiella burnetii</i> Dugway 5J108-111           | 2.16 | NCBI | 434922 |   | class  | Gammaproteobacteria |
| <i>Coxiella burnetii</i> RSA 331                    | 2.02 | NCBI | 360115 |   | class  | Gammaproteobacteria |
| <i>Coxiella burnetii</i> RSA 493                    | 2    | NCBI | 227377 |   | class  | Gammaproteobacteria |
| <i>Croceibacter atlanticus</i> HTCC2559             | 2.95 | NCBI | 216432 |   | genus  | Croceibacter        |
| <i>Cronobacter sakazakii</i> ATCC BAA-894           | 4.37 | NCBI | 290339 |   | genus  | Cronobacter         |
| <i>Cronobacter turicensis</i> z3032                 | 4.38 | NCBI | 693216 |   | genus  | Cronobacter         |
| <i>Cryptobacterium curtum</i> DSM 15641             | 1.62 | NCBI | 469378 |   | genus  | Cryptobacterium     |
| <i>Cupriavidus metallidurans</i> CH34               | 3.93 | NCBI | 266264 |   | genus  | Cupriavidus         |
| <i>Cupriavidus taiwanensis</i>                      | 5.92 | NCBI | 164546 |   | genus  | Cupriavidus         |
| <i>cyanobacterium</i> UCYN-A                        | 1.44 | NCBI | 713887 |   | class  | Cyanobacteria       |
| <i>Cyanothece</i> sp. ATCC 51142                    | 5.36 | NCBI | 43989  |   | class  | Cyanobacteria       |
| <i>Cyanothece</i> sp. PCC 7424                      | 5.94 | NCBI | 65393  |   | class  | Cyanobacteria       |
| <i>Cyanothece</i> sp. PCC 7425                      | 5.37 | NCBI | 395961 |   | class  | Cyanobacteria       |
| <i>Cyanothece</i> sp. PCC 8801                      | 4.68 | NCBI | 41431  |   | class  | Cyanobacteria       |
| <i>Cyanothece</i> sp. PCC 8802                      | 4.67 | NCBI | 395962 |   | class  | Cyanobacteria       |
| <i>Cytophaga hutchinsonii</i> ATCC 33406            | 4.43 | NCBI | 269798 |   | genus  | Cytophaga           |
| <i>Dechloromonas aromatica</i> RCB                  | 4.5  | NCBI | 159087 |   | genus  | Ferribacterium      |
| <i>Deferribacter desulfuricans</i> SSM1             | 2.23 | NCBI | 639282 |   | genus  | Deferribacter       |
| <i>Dehalococcoides ethenogenes</i> 195              | 1.47 | NCBI | 243164 |   | genus  | Dehalococcoides     |
| <i>Dehalococcoides</i> sp. BAV1                     | 1.34 | NCBI | 216389 |   | genus  | Dehalococcoides     |
| <i>Dehalococcoides</i> sp. CBDB1                    | 1.4  | NCBI | 255470 |   | genus  | Dehalococcoides     |
| <i>Dehalococcoides</i> sp. GT                       | 1.36 | NCBI | 633145 |   | genus  | Dehalococcoides     |
| <i>Dehalococcoides</i> sp. VS                       | 1.41 | NCBI | 311424 |   | genus  | Dehalococcoides     |
| <i>Dehalogenimonas lykanthroporepellens</i> BL-DC-9 | 1.69 | NCBI | 552811 |   | genus  | Dehalogenimonas     |
| <i>Deinococcus deserti</i> VCD115                   | 2.82 | NCBI | 546414 |   | genus  | Deinococcus         |
| <i>Deinococcus geothermalis</i> DSM 11300           | 2.47 | NCBI | 319795 |   | genus  | Deinococcus         |
| <i>Deinococcus radiodurans</i> R1                   | 3.06 | NCBI | 243230 |   | genus  | Deinococcus         |
| <i>Delftia acidovorans</i> SPH-1                    | 6.77 | NCBI | 398578 |   | genus  | Delftia             |
| <i>Denitrovibrio acetiphilus</i> DSM 12809          | 3.22 | NCBI | 522772 |   | genus  | Denitrovibrio       |
| <i>Desulfatibacillum alkenivorans</i> AK-01         | 6.52 | NCBI | 439235 |   | genus  | Desulfatibacillum   |
| <i>Desulfitobacterium hafniense</i> DCB-2           | 5.28 | NCBI | 272564 | * | genus  | Desulfitobacterium  |
| <i>Desulfitobacterium hafniense</i> Y51             | 5.73 | NCBI | 138119 | * | genus  | Desulfitobacterium  |
| <i>Desulfobacterium autotrophicum</i> HRM2          | 5.59 | NCBI | 177437 |   | genus  | Desulfobacterium    |
| <i>Desulfococcus oleovorans</i> Hxd3                | 3.94 | NCBI | 96561  |   | family | Desulfobacteraceae  |
| <i>Desulfohalobium retbaense</i> DSM 5692           | 2.86 | NCBI | 485915 |   | genus  | Desulfohalobium     |
| <i>Desulfomicrobium baculatum</i> DSM 4028          | 3.94 | NCBI | 525897 |   | genus  | Desulfomicrobium    |
| <i>Desulfotalea psychrophila</i> Lsv54              | 3.52 | NCBI | 177439 |   | genus  | Desulfotalea        |
| <i>Desulfotomaculum acetoxidans</i> DSM 771         | 4.55 | NCBI | 485916 |   | genus  | Desulfotomaculum    |

|                                                                                |      |         |        |   |        |                  |
|--------------------------------------------------------------------------------|------|---------|--------|---|--------|------------------|
| <i>Desulfotomaculum reducens</i> MI-1                                          | 3.61 | NCBI    | 349161 |   | genus  | Desulfotomaculum |
| <i>Desulfovibrio desulfuricans</i> subsp. <i>desulfuricans</i> str. ATCC 27774 | 2.87 | NCBI    | 525146 |   | genus  | Desulfovibrio    |
| <i>Desulfovibrio desulfuricans</i> subsp. <i>desulfuricans</i> str. G20        | 3.73 | NCBI    | 207559 | * | genus  | Desulfovibrio    |
| <i>Desulfovibrio magneticus</i> RS-1                                           | 5.25 | NCBI    | 573370 |   | genus  | Desulfovibrio    |
| <i>Desulfovibrio piger</i> ATCC 29098                                          | 2.87 | HMP     | 411464 | * | genus  | Desulfovibrio    |
| <i>Desulfovibrio salexigens</i> DSM 2638                                       | 4.29 | NCBI    | 526222 |   | genus  | Desulfovibrio    |
| <i>Desulfovibrio vulgaris</i> DP4                                              | 3.46 | NCBI    | 391774 |   | genus  | Desulfovibrio    |
| <i>Desulfovibrio vulgaris</i> str. Hildenborough                               | 3.57 | NCBI    | 882    |   | genus  | Desulfovibrio    |
| <i>Desulfovibrio vulgaris</i> str. 'Miyazaki F'                                | 4.04 | NCBI    | 883    |   | genus  | Desulfovibrio    |
| <i>Desulfurivibrio alkaliphilus</i> AHT2                                       | 3.1  | NCBI    | 589865 |   | genus  | Desulfurivibrio  |
| <i>Desulfurococcus kamchatkensis</i> 1221n                                     | 1.37 | NCBI    | 490899 |   | genus  | Desulfurococcus  |
| <i>Dialister invisus</i> DSM 15470                                             | 1.9  | HMP     | 592028 |   | genus  | Dialister        |
| <i>Dichelobacter nodosus</i> VCS1703A                                          | 1.39 | NCBI    | 246195 |   | genus  | Dichelobacter    |
| <i>Dickeya dadantii</i> Ech586                                                 | 4.82 | NCBI    | 590409 |   | genus  | Dickeya          |
| <i>Dickeya dadantii</i> Ech703                                                 | 4.68 | NCBI    | 579405 |   | genus  | Dickeya          |
| <i>Dickeya zeae</i> Ech1591                                                    | 4.81 | NCBI    | 561229 |   | genus  | Dickeya          |
| <i>Dictyoglomus thermophilum</i> H-6-12                                        | 1.96 | NCBI    | 309799 |   | genus  | Dictyoglomus     |
| <i>Dictyoglomus turgidum</i> DSM 6724                                          | 1.86 | NCBI    | 515635 |   | genus  | Dictyoglomus     |
| <i>Dinoroseobacter shibae</i> DFL 12                                           | 3.79 | NCBI    | 398580 |   | genus  | Dinoroseobacter  |
| <i>Dorea formicigenerans</i> ATCC 27755                                        | 1.14 | HMP     | 411461 | * | genus  | Dorea            |
| <i>Dorea longicatena</i> DSM 13814                                             | 2.92 | HMP     | 411462 | * | genus  | Dorea            |
| <i>Dyadobacter fermentans</i> DSM 18053                                        | 6.97 | NCBI    | 471854 |   | genus  | Dyadobacter      |
| <i>Edwardsiella ictaluri</i> 93-146                                            | 3.81 | NCBI    | 634503 |   | genus  | Edwardsiella     |
| <i>Edwardsiella tarda</i> ATCC 23685                                           | 3.74 | HMP     | 500638 | * | genus  | Edwardsiella     |
| <i>Edwardsiella tarda</i> EIB202                                               | 3.76 | NCBI    | 498217 | * | genus  | Edwardsiella     |
| <i>Eggerthella lenta</i> DSM 2243                                              | 3.63 | NCBI    | 479437 | * | genus  | Eggerthella      |
| <i>Ehrlichia canis</i> str. Jake                                               | 1.32 | NCBI    | 269484 |   | genus  | Ehrlichia        |
| <i>Ehrlichia chaffeensis</i> str. Arkansas                                     | 1.18 | NCBI    | 205920 |   | genus  | Ehrlichia        |
| <i>Ehrlichia ruminantium</i> str. Gardel                                       | 1.5  | NCBI    | 302409 |   | genus  | Ehrlichia        |
| <i>Ehrlichia ruminantium</i> str. Welgevonden                                  | 3.03 | NCBI    | 254945 |   | genus  | Ehrlichia        |
| <i>Eikenella corrodens</i> ATCC 23834                                          | 2.17 | HMP     | 546274 |   | family | Neisseriaceae    |
| <i>Elusimicrobium minutum</i> Pei191                                           | 1.64 | NCBI    | 445932 |   | domain | Bacteria         |
| <i>Enhydrobacter aerosaccus</i> SK60                                           | 2.7  | HMP     | 553217 |   | genus  | Enhydrobacter    |
| <i>Enterobacter cancerogenus</i> ATCC 35316                                    | 4.64 | HMP     | 500639 | * | genus  | Enterobacter     |
| <i>Enterobacter cloacae</i> subsp. <i>cloacae</i> ATCC 13047                   | 5.31 | NCBI    | 716541 | * | genus  | Enterobacter     |
| <i>Enterobacter cloacae</i> subsp. <i>cloacae</i> NCTC 9394                    | 4.91 | MetaHIT | 718254 | * | genus  | Enterobacter     |
| <i>Enterobacter</i> sp. 638                                                    | 4.52 | NCBI    | 399742 |   | genus  | Enterobacter     |
| <i>Enterococcus faecalis</i>                                                   | 0.02 | NCBI    | 1351   | * |        |                  |

|                                                |      |         |        |   |       |                      |
|------------------------------------------------|------|---------|--------|---|-------|----------------------|
| <i>Enterococcus faecalis</i> ATCC 29200        | 2.97 | HMP     | 525271 | * | genus | Enterococcus         |
| <i>Enterococcus faecalis</i> HH22              | 3.13 | HMP     | 491075 | * | genus | Enterococcus         |
| <i>Enterococcus faecalis</i> PC1.1             | 2.75 | HMP     | 791166 | * | genus | Enterococcus         |
| <i>Enterococcus faecalis</i> R712              | 3.04 | HMP     | 699186 | * | genus | Enterococcus         |
| <i>Enterococcus faecalis</i> S613              | 3.05 | HMP     | 699185 | * | genus | Enterococcus         |
| <i>Enterococcus faecalis</i> TUSoD Ef11        | 2.8  | HMP     | 553209 | * | genus | Enterococcus         |
| <i>Enterococcus faecalis</i> TX0104            | 3.16 | HMP     | 491074 | * | genus | Enterococcus         |
| <i>Enterococcus faecalis</i> TX1322            | 2.97 | HMP     | 525278 | * | genus | Enterococcus         |
| <i>Enterococcus faecalis</i> V583              | 3.22 | NCBI    | 226185 | * | genus | Enterococcus         |
| <i>Enterococcus faecium</i> DO                 | 2.83 | HMP     | 333849 | * | genus | Enterococcus         |
| <i>Enterococcus faecium</i> PC4.1              | 2.81 | HMP     | 791161 | * | genus | Enterococcus         |
| <i>Enterococcus faecium</i> TX1330             | 2.78 | HMP     | 525279 | * | genus | Enterococcus         |
| <i>Enterococcus</i> sp. 7L76                   | 3.1  | MetaHIT | 657310 | * | genus | Enterococcus         |
| <i>Erwinia amylovora</i> ATCC 49946            | 3.81 | NCBI    | 716540 |   | genus | Erwinia              |
| <i>Erwinia amylovora</i> CFBP1430              | 3.81 | NCBI    | 665029 |   | genus | Erwinia              |
| <i>Erwinia pyrifoliae</i> Ep1/96               | 4.03 | NCBI    | 634499 |   | genus | Erwinia              |
| <i>Erwinia tasmaniensis</i> Et1/99             | 3.88 | NCBI    | 465817 |   | genus | Erwinia              |
| <i>Erysipelothrix rhusiopathiae</i> ATCC 19414 | 1.73 | HMP     | 525280 |   | genus | Erysipelothrix       |
| <i>Erysipelotrichaceae</i> bacterium 5_2_54FAA | 3.19 | HMP     | 552396 |   | genus | Eubacterium          |
| <i>Erythrobacter litoralis</i> HTCC2594        | 3.05 | NCBI    | 314225 |   | genus | Erythrobacter        |
| <i>Escherichia coli</i> 536                    | 4.94 | NCBI    | 362663 | * | genus | Escherichia/Shigella |
| <i>Escherichia coli</i> 55989                  | 5.15 | NCBI    | 585055 | * | genus | Escherichia/Shigella |
| <i>Escherichia coli</i> 83972                  | 5.11 | HMP     | 525281 | * | genus | Escherichia/Shigella |
| <i>Escherichia coli</i> APEC O1                | 5.08 | NCBI    | 405955 | * | genus | Escherichia/Shigella |
| <i>Escherichia coli</i> ATCC 8739              | 4.75 | NCBI    | 481805 | * | genus | Escherichia/Shigella |
| <i>Escherichia coli</i> B str. REL606          | 4.63 | NCBI    | 413997 | * | genus | Escherichia/Shigella |
| <i>Escherichia coli</i> BL21(DE3)              | 4.57 | NCBI    | 469008 | * | genus | Escherichia/Shigella |
| <i>Escherichia coli</i> BW2952                 | 4.58 | NCBI    | 595496 | * | genus | Escherichia/Shigella |
| <i>Escherichia coli</i> CFT073                 | 5.23 | NCBI    | 199310 | * | genus | Escherichia/Shigella |
| <i>Escherichia coli</i> E24377A                | 4.98 | NCBI    | 331111 | * | genus | Escherichia/Shigella |
| <i>Escherichia coli</i> ED1a                   | 5.21 | NCBI    | 585397 | * | genus | Escherichia/Shigella |
| <i>Escherichia coli</i> HS                     | 4.64 | NCBI    | 331112 | * | genus | Escherichia/Shigella |
| <i>Escherichia coli</i> IAI1                   | 4.7  | NCBI    | 585034 | * | genus | Escherichia/Shigella |
| <i>Escherichia coli</i> IAI39                  | 5.13 | NCBI    | 585057 | * | genus | Escherichia/Shigella |
| <i>Escherichia coli</i> O103:H2 str. 12009     | 5.45 | NCBI    | 585395 | * | genus | Escherichia/Shigella |
| <i>Escherichia coli</i> O111:H- str. 11128     | 5.37 | NCBI    | 585396 | * | genus | Escherichia/Shigella |
| <i>Escherichia coli</i> O127:H6 str. E2348/69  | 4.97 | NCBI    | 574521 | * | genus | Escherichia/Shigella |
| <i>Escherichia coli</i> O157:H7 EDL933         | 5.53 | NCBI    | 155864 | * | genus | Escherichia/Shigella |
| <i>Escherichia coli</i> O157:H7 str. EC4115    | 5.57 | NCBI    | 444450 | * | genus | Escherichia/Shigella |
| <i>Escherichia coli</i> O157:H7 str. Sakai     | 5.5  | NCBI    | 386585 | * | genus | Escherichia/Shigella |
| <i>Escherichia coli</i> O157:H7 str. TW14359   | 5.53 | NCBI    | 544404 | * | genus | Escherichia/Shigella |

|                                                                |      |         |        |   |        |                      |
|----------------------------------------------------------------|------|---------|--------|---|--------|----------------------|
| <i>Escherichia coli</i> O26:H11 str. 11368                     | 5.7  | NCBI    | 573235 | * | genus  | Escherichia/Shigella |
| <i>Escherichia coli</i> O55:H7 str. CB9615                     | 5.39 | NCBI    | 701177 | * | genus  | Escherichia/Shigella |
| <i>Escherichia coli</i> S88                                    | 5.03 | NCBI    | 585035 | * | genus  | Escherichia/Shigella |
| <i>Escherichia coli</i> SE11                                   | 4.89 | NCBI    | 409438 | * | genus  | Escherichia/Shigella |
| <i>Escherichia coli</i> SE15                                   | 4.72 | HMP     | 431946 | * | genus  | Escherichia/Shigella |
| <i>Escherichia coli</i> SMS-3-5                                | 5.07 | NCBI    | 439855 | * | genus  | Escherichia/Shigella |
| <i>Escherichia coli</i> str. K-12 substr. DH10B                | 4.69 | NCBI    | 316385 | * | genus  | Escherichia/Shigella |
| <i>Escherichia coli</i> str. K-12 substr. MG1655               | 4.64 | NCBI    | 511145 | * | genus  | Escherichia/Shigella |
| <i>Escherichia coli</i> str. K-12 substr. W3110                | 4.65 | NCBI    | 316407 | * | genus  | Escherichia/Shigella |
| <i>Escherichia coli</i> UMN026                                 | 5.2  | NCBI    | 585056 | * | genus  | Escherichia/Shigella |
| <i>Escherichia coli</i> UTI89                                  | 5.07 | NCBI    | 364106 | * | genus  | Escherichia/Shigella |
| <i>Escherichia fergusonii</i> ATCC 35469                       | 4.59 | NCBI    | 585054 |   | genus  | Escherichia/Shigella |
| <i>Escherichia</i> sp. 1_1_43                                  | 2.24 | HMP     | 457400 | * | genus  | Escherichia/Shigella |
| <i>Escherichia</i> sp. 3_2_53FAA                               | 4.99 | HMP     | 469598 | * |        |                      |
| <i>Escherichia</i> sp. 4_1_40B                                 | 4.93 | HMP     | 457401 | * | genus  | Escherichia/Shigella |
| <i>Eubacterium bifforme</i> DSM 3989                           | 2.52 | HMP     | 518637 |   | genus  | Eubacterium          |
| <i>Eubacterium cylindroides</i> T2-87                          | 1.97 | MetaHIT | 717960 | * | genus  | Eubacterium          |
| <i>Eubacterium dolichum</i> DSM 3991                           | 2.19 | HMP     | 428127 | * | genus  | Eubacterium          |
| <i>Eubacterium eligens</i> ATCC 27750                          | 2.14 | NCBI    | 515620 | * | family | Lachnospiraceae      |
| <i>Eubacterium hallii</i> DSM 3353                             | 3.29 | HMP     | 411469 | * | family | Lachnospiraceae      |
| <i>Eubacterium rectale</i> ATCC 33656                          | 3.45 | NCBI    | 515619 | * | genus  | Roseburia            |
| <i>Eubacterium rectale</i> DSM 17629                           | 3.34 | MetaHIT | 657318 | * | genus  | Roseburia            |
| <i>Eubacterium rectale</i> M104/1                              | 3.7  | MetaHIT | 657317 | * | genus  | Roseburia            |
| <i>Eubacterium saphenum</i> ATCC 49989                         | 1.08 | HMP     | 592031 |   | genus  | Eubacterium          |
| <i>Eubacterium siraeum</i> 70/3                                | 2.94 | MetaHIT | 657319 | * |        |                      |
| <i>Eubacterium siraeum</i> DSM 15702                           | 2.7  | HMP     | 428128 | * | family | Ruminococcaceae      |
| <i>Eubacterium siraeum</i> V10Sc8a                             | 2.84 | MetaHIT | 717961 | * | family | Ruminococcaceae      |
| <i>Eubacterium ventriosum</i> ATCC 27560                       | 2.87 | HMP     | 411463 | * | family | Lachnospiraceae      |
| <i>Exiguobacterium sibiricum</i> 255-15                        | 3.03 | NCBI    | 262543 |   | genus  | Exiguobacterium      |
| <i>Exiguobacterium</i> sp. AT1b                                | 3    | NCBI    | 360911 |   | genus  | Exiguobacterium      |
| <i>Faecalibacterium prausnitzii</i> A2-165                     | 3.09 | HMP     | 411483 | * | genus  | Faecalibacterium     |
| <i>Faecalibacterium prausnitzii</i> L2-6                       | 3.32 | MetaHIT | 718252 | * |        |                      |
| <i>Faecalibacterium prausnitzii</i> M21/2                      | 3.13 | HMP     | 411485 | * | genus  | Faecalibacterium     |
| <i>Faecalibacterium prausnitzii</i> SL3/3                      | 3.21 | MetaHIT | 657322 | * | genus  | Faecalibacterium     |
| <i>Ferroglobus placidus</i> DSM 10642                          | 2.2  | NCBI    | 589924 |   | genus  | Ferroglobus          |
| <i>Fervidobacterium nodosum</i> Rt17-B1                        | 1.95 | NCBI    | 381764 |   | genus  | Fervidobacterium     |
| <i>Fibrobacter succinogenes</i> subsp. <i>succinogenes</i> S85 | 3.84 | NCBI    | 59374  |   | genus  | Fibrobacter          |
| <i>Filifactor alocis</i> ATCC 35896                            | 1.91 | HMP     | 546269 |   | genus  | Filifactor           |
| <i>Finegoldia magna</i> ATCC 29328                             | 1.8  | NCBI    | 334413 | * | genus  | Finegoldia           |
| <i>Finegoldia magna</i> ATCC 53516                             | 1.94 | HMP     | 525282 | * | genus  | Finegoldia           |

|                                                                       |      |      |        |   |          |                  |
|-----------------------------------------------------------------------|------|------|--------|---|----------|------------------|
| <i>Flavobacteriaceae bacterium 3519-10</i>                            | 2.77 | NCBI | 531844 |   | genus    | Chryseobacterium |
| <i>Flavobacterium johnsoniae</i> UW101                                | 6.1  | NCBI | 376686 |   | genus    | Flavobacterium   |
| <i>Flavobacterium psychrophilum</i> JIP02/86                          | 2.86 | NCBI | 402612 |   | genus    | Flavobacterium   |
| <i>Francisella novicida</i> U112                                      | 1.91 | NCBI | 401614 |   | genus    | Francisella      |
| <i>Francisella philomiragia</i> subsp. <i>philomiragia</i> ATCC 25017 | 2.05 | NCBI | 484022 |   | genus    | Francisella      |
| <i>Francisella tularensis</i> subsp. <i>holarctica</i>                | 1.9  | NCBI | 119857 |   | genus    | Francisella      |
| <i>Francisella tularensis</i> subsp. <i>holarctica</i> FTNF002-00     | 1.89 | NCBI | 458234 |   | genus    | Francisella      |
| <i>Francisella tularensis</i> subsp. <i>holarctica</i> OSU18          | 1.9  | NCBI | 393011 |   | genus    | Francisella      |
| <i>Francisella tularensis</i> subsp. <i>mediasiatica</i> FSC147       | 1.89 | NCBI | 441952 |   | genus    | Francisella      |
| <i>Francisella tularensis</i> subsp. <i>tularensis</i> FSC198         | 1.89 | NCBI | 393115 |   | genus    | Francisella      |
| <i>Francisella tularensis</i> subsp. <i>tularensis</i> SCHU S4        | 1.89 | NCBI | 177416 |   | genus    | Francisella      |
| <i>Francisella tularensis</i> subsp. <i>tularensis</i> WY96-3418      | 1.9  | NCBI | 418136 |   | genus    | Francisella      |
| <i>Frankia alni</i> ACN14a                                            | 7.5  | NCBI | 326424 |   | suborder | Frankineae       |
| <i>Frankia</i> sp. <i>Ccl3</i>                                        | 5.43 | NCBI | 106370 |   | suborder | Frankineae       |
| <i>Frankia</i> sp. <i>EAN1pec</i>                                     | 8.98 | NCBI | 298653 |   | suborder | Frankineae       |
| <i>Fusobacterium gonidiaformans</i> ATCC 25563                        | 1.71 | HMP  | 469615 | * | genus    | Fusobacterium    |
| <i>Fusobacterium mortiferum</i> ATCC 9817                             | 2.69 | HMP  | 469616 | * | genus    | Fusobacterium    |
| <i>Fusobacterium nucleatum</i> subsp. <i>nucleatum</i> ATCC 23726     | 2.24 | HMP  | 525283 | * | genus    | Fusobacterium    |
| <i>Fusobacterium nucleatum</i> subsp. <i>nucleatum</i> ATCC 25586     | 2.17 | NCBI | 190304 | * | genus    | Fusobacterium    |
| <i>Fusobacterium periodonticum</i> ATCC 33693                         | 2.62 | HMP  | 546275 |   | genus    | Fusobacterium    |
| <i>Fusobacterium</i> sp. <i>1_1_41FAA</i>                             | 2.48 | HMP  | 469621 | * | genus    | Fusobacterium    |
| <i>Fusobacterium</i> sp. <i>2_1_31</i>                                | 2.53 | HMP  | 469599 | * | genus    | Fusobacterium    |
| <i>Fusobacterium</i> sp. <i>3_1_27</i>                                | 2.21 | HMP  | 469602 | * | genus    | Fusobacterium    |
| <i>Fusobacterium</i> sp. <i>3_1_33</i>                                | 2.31 | HMP  | 469603 | * | genus    | Fusobacterium    |
| <i>Fusobacterium</i> sp. <i>3_1_36A2</i>                              | 2.26 | HMP  | 469604 | * | genus    | Fusobacterium    |
| <i>Fusobacterium</i> sp. <i>3_1_5R</i>                                | 1.93 | HMP  | 469605 | * | genus    | Fusobacterium    |
| <i>Fusobacterium</i> sp. <i>4_1_13</i>                                | 2.27 | HMP  | 469606 | * | genus    | Fusobacterium    |
| <i>Fusobacterium</i> sp. <i>7_1</i>                                   | 2.51 | HMP  | 457405 | * | genus    | Fusobacterium    |
| <i>Fusobacterium</i> sp. <i>D11</i>                                   | 2.45 | HMP  | 556264 | * | genus    | Fusobacterium    |
| <i>Fusobacterium</i> sp. <i>D12</i>                                   | 2.13 | HMP  | 556263 | * | genus    | Fusobacterium    |
| <i>Fusobacterium ulcerans</i> ATCC 49185                              | 3.5  | HMP  | 469617 | * | genus    | Fusobacterium    |
| <i>Fusobacterium varium</i> ATCC 27725                                | 3.32 | HMP  | 469618 | * | genus    | Fusobacterium    |
| <i>Gardnerella vaginalis</i> 409-05                                   | 3.24 | NCBI | 553190 |   | genus    | Gardnerella      |
| <i>Gardnerella vaginalis</i> ATCC 14019                               | 1.69 | HMP  | 525284 |   | genus    | Gardnerella      |
| <i>Gemella haemolysans</i> ATCC 10379                                 | 1.89 | HMP  | 546270 |   | genus    | Gemella          |
| <i>Gemmatimonas aurantiaca</i> T-27                                   | 4.64 | NCBI | 379066 |   | genus    | Gemmatimonas     |

|                                               |      |         |        |   |       |                   |
|-----------------------------------------------|------|---------|--------|---|-------|-------------------|
| <i>Geobacillus kaustophilus</i> HTA426        | 3.54 | NCBI    | 235909 |   | genus | Geobacillus       |
| <i>Geobacillus</i> sp. C56-T3                 | 3.65 | NCBI    | 691437 |   | genus | Geobacillus       |
| <i>Geobacillus</i> sp. WCH70                  | 3.46 | NCBI    | 471223 |   | genus | Geobacillus       |
| <i>Geobacillus</i> sp. Y412MC10               | 7.12 | NCBI    | 481743 |   | genus | Paenibacillus     |
| <i>Geobacillus</i> sp. Y412MC61               | 3.62 | NCBI    | 544556 |   | genus | Geobacillus       |
| <i>Geobacillus thermodenitrificans</i> NG80-2 | 3.55 | NCBI    | 420246 |   | genus | Geobacillus       |
| <i>Geobacter bemidjiensis</i> Bem             | 4.62 | NCBI    | 404380 |   | genus | Geobacter         |
| <i>Geobacter lovleyi</i> SZ                   | 3.92 | NCBI    | 398767 |   | genus | Geobacter         |
| <i>Geobacter metallireducens</i> GS-15        | 4    | NCBI    | 269799 |   | genus | Geobacter         |
| <i>Geobacter</i> sp. FRC-32                   | 4.3  | NCBI    | 316067 |   | genus | Geobacter         |
| <i>Geobacter</i> sp. M21                      | 4.75 | NCBI    | 443144 |   | genus | Geobacter         |
| <i>Geobacter sulfurreducens</i> PCA           | 3.81 | NCBI    | 243231 |   | genus | Geobacter         |
| <i>Geobacter uraniireducens</i> Rf4           | 5.14 | NCBI    | 351605 |   | genus | Geobacter         |
| <i>Geodermatophilus obscurus</i> DSM 43160    | 5.32 | NCBI    | 526225 |   | genus | Geodermatophilus  |
| <i>Gloeobacter violaceus</i> PCC 7421         | 4.66 | NCBI    | 251221 |   | class | Cyanobacteria     |
| <i>Gluconacetobacter diazotrophicus</i> PAI 5 | 7.83 | NCBI    | 272568 |   | genus | Gluconacetobacter |
| <i>Gluconobacter oxydans</i> 621H             | 2.7  | NCBI    | 290633 |   | genus | Gluconobacter     |
| <i>Gordonia bronchialis</i> DSM 43247         | 5.21 | NCBI    | 526226 |   | genus | Gordonia          |
| <i>Gordonibacter pamelaiae</i> 7-10-1-b       | 3.61 | MetaHIT | 657308 | * | genus | Gordonibacter     |
| <i>Gramella forsetii</i> KT0803               | 3.8  | NCBI    | 411154 |   | genus | Gramella          |
| <i>Granulibacter bethesdensis</i> CGDNIH1     | 2.71 | NCBI    | 391165 |   | genus | Granulibacter     |
| <i>Granulicatella adiacens</i> ATCC 49175     | 1.95 | HMP     | 638301 |   | genus | Granulicatella    |
| <i>Granulicatella elegans</i> ATCC 700633     | 1.9  | HMP     | 626369 |   | genus | Granulicatella    |
| <i>Haemophilus ducreyi</i> 35000HP            | 1.7  | NCBI    | 233412 |   | genus | Haemophilus       |
| <i>Haemophilus influenzae</i> 86-028NP        | 1.91 | NCBI    | 281310 |   | genus | Haemophilus       |
| <i>Haemophilus influenzae</i> PittEE          | 1.81 | NCBI    | 374930 |   | genus | Haemophilus       |
| <i>Haemophilus influenzae</i> PittGG          | 1.89 | NCBI    | 374931 |   | genus | Haemophilus       |
| <i>Haemophilus influenzae</i> Rd KW20         | 1.83 | NCBI    | 71421  |   | genus | Haemophilus       |
| <i>Haemophilus parasuis</i> SH0165            | 2.27 | NCBI    | 557723 |   | genus | Haemophilus       |
| <i>Haemophilus somnus</i> 129PT               | 2.01 | NCBI    | 205914 |   | genus | Histophilus       |
| <i>Haemophilus somnus</i> 2336                | 2.26 | NCBI    | 228400 |   | genus | Histophilus       |
| <i>Hahella chejuensis</i> KCTC 2396           | 7.22 | NCBI    | 349521 |   | genus | Hahella           |
| <i>Haliangium ochraceum</i> DSM 14365         | 9.45 | NCBI    | 502025 |   | genus | Haliangium        |
| <i>Haloarcula marismortui</i> ATCC 43049      | 3.42 | NCBI    | 272569 |   | genus | Haloarcula        |
| <i>Halobacterium salinarum</i> R1             | 2    | NCBI    | 478009 |   | genus | Halobacterium     |
| <i>Halobacterium</i> sp. NRC-1                | 2.01 | NCBI    | 64091  |   | genus | Halobacterium     |
| <i>Haloferax volcanii</i> DS2                 | 2.85 | NCBI    | 309800 |   | genus | Haloferax         |
| <i>Halomicrobium mukohataei</i> DSM 12286     | 3.11 | NCBI    | 485914 |   | genus | Halomicrobium     |
| <i>Haloquadratum walsbyi</i> DSM 16790        | 3.13 | NCBI    | 362976 |   | genus | Haloquadratum     |
| <i>Halorhabdus utahensis</i> DSM 12940        | 3.12 | NCBI    | 519442 |   | genus | Halorhabdus       |
| <i>Halorhodospira halophila</i> SL1           | 2.68 | NCBI    | 349124 |   | genus | Halorhodospira    |

|                                                |      |      |        |   |        |                  |
|------------------------------------------------|------|------|--------|---|--------|------------------|
| <i>Halorubrum lacusprofundi</i> ATCC 49239     | 3.26 | NCBI | 416348 |   | genus  | Halorubrum       |
| <i>Haloterrigena turkmenica</i> DSM 5511       | 3.89 | NCBI | 543526 |   | genus  | Haloterrigena    |
| <i>Halothermothrix orenii</i> H 168            | 2.58 | NCBI | 373903 |   | genus  | Halothermothrix  |
| <i>Halothiobacillus neapolitanus</i> c2        | 2.58 | NCBI | 555778 |   | genus  | Halothiobacillus |
| <i>Helicobacter acinonychis</i> str. Sheeba    | 1.55 | NCBI | 382638 |   | genus  | Helicobacter     |
| <i>Helicobacter bilis</i> ATCC 43879           | 2.6  | HMP  | 613026 | * | genus  | Helicobacter     |
| <i>Helicobacter canadensis</i> MIT 98-5491     | 1.63 | HMP  | 537970 | * | genus  | Helicobacter     |
| <i>Helicobacter cinaedi</i> CCUG 18818         | 2.21 | HMP  | 537971 | * | genus  | Helicobacter     |
| <i>Helicobacter hepaticus</i> ATCC 51449       | 1.8  | NCBI | 235279 |   | genus  | Helicobacter     |
| <i>Helicobacter mustelae</i> 12198             | 1.58 | NCBI | 679897 |   | genus  | Helicobacter     |
| <i>Helicobacter pullorum</i> MIT 98-5489       | 1.95 | HMP  | 537972 | * | genus  | Helicobacter     |
| <i>Helicobacter pylori</i> 26695               | 1.67 | NCBI | 85962  | * | genus  | Helicobacter     |
| <i>Helicobacter pylori</i> B38                 | 1.58 | NCBI | 592205 | * | genus  | Helicobacter     |
| <i>Helicobacter pylori</i> B8                  | 1.67 | NCBI | 693745 | * | genus  | Helicobacter     |
| <i>Helicobacter pylori</i> G27                 | 1.65 | NCBI | 563041 | * | genus  | Helicobacter     |
| <i>Helicobacter pylori</i> HPAG1               | 1.6  | NCBI | 357544 | * | genus  | Helicobacter     |
| <i>Helicobacter pylori</i> J99                 | 1.64 | NCBI | 85963  | * | genus  | Helicobacter     |
| <i>Helicobacter pylori</i> P12                 | 1.67 | NCBI | 570508 | * | genus  | Helicobacter     |
| <i>Helicobacter pylori</i> Shi470              | 1.61 | NCBI | 512562 | * | genus  | Helicobacter     |
| <i>Helicobacter winghamensis</i> ATCC BAA-430  | 1.69 | HMP  | 556267 | * | genus  | Helicobacter     |
| <i>Heliobacterium modesticaldum</i> Ice1       | 3.08 | NCBI | 498761 |   | genus  | Heliobacterium   |
| <i>Herminiimonas arsenicoxydans</i>            | 3.42 | NCBI | 204773 |   | genus  | Herminiimonas    |
| <i>Herpetosiphon aurantiacus</i> ATCC 23779    | 6.35 | NCBI | 316274 |   | genus  | Herpetosiphon    |
| <i>Hirschia baltica</i> ATCC 49814             | 3.46 | NCBI | 582402 |   | genus  | Hirschia         |
| <i>Holdemania filiformis</i> DSM 12042         | 3.93 | HMP  | 545696 | * | genus  | Holdemania       |
| <i>Hydrogenobacter thermophilus</i> TK-6       | 1.74 | NCBI | 608538 |   | genus  | Hydrogenobacter  |
| <i>Hydrogenobaculum</i> sp. Y04AAS1            | 1.56 | NCBI | 380749 |   | genus  | Hydrogenobaculum |
| <i>Hyperthermus butylicus</i> DSM 5456         | 1.67 | NCBI | 415426 |   | genus  | Hyperthermus     |
| <i>Hyphomicrobium denitrificans</i> ATCC 51888 | 3.64 | NCBI | 582899 |   | genus  | Hyphomicrobium   |
| <i>Hyphomonas neptunium</i> ATCC 15444         | 3.71 | NCBI | 228405 |   | genus  | Hyphomonas       |
| <i>Idiomarina loihiensis</i> L2TR              | 2.84 | NCBI | 283942 |   | genus  | Idiomarina       |
| <i>Ignicoccus hospitalis</i> KIN4/I            | 1.3  | NCBI | 453591 |   | genus  | Ignicoccus       |
| <i>Jannaschia</i> sp. CCS1                     | 4.32 | NCBI | 290400 |   | family | Rhodobacteraceae |
| <i>Janthinobacterium</i> sp. Marseille         | 4.11 | NCBI | 375286 |   | genus  | Herminiimonas    |
| <i>Jonesia denitrificans</i> DSM 20603         | 2.75 | NCBI | 471856 |   | genus  | Jonesia          |
| <i>Jonquetella anthropi</i> E3_33 E1           | 1.79 | HMP  | 645512 |   | genus  | Jonquetella      |
| <i>Kangiella koreensis</i> DSM 16069           | 2.85 | NCBI | 523791 |   | genus  | Kangiella        |
| <i>Kineococcus radiotolerans</i> SRS30216      | 4.76 | NCBI | 266940 |   | genus  | Kineococcus      |
| <i>Kingella oralis</i> ATCC 51147              | 2.41 | HMP  | 629741 |   | genus  | Kingella         |
| <i>Klebsiella pneumoniae</i> 342               | 5.64 | NCBI | 507522 |   | genus  | Klebsiella       |
| <i>Klebsiella pneumoniae</i> NTUH-K2044        | 5.25 | NCBI | 484021 |   | genus  | Klebsiella       |

|                                                                           |      |      |        |   |       |               |
|---------------------------------------------------------------------------|------|------|--------|---|-------|---------------|
| <i>Klebsiella pneumoniae</i> subsp. <i>pneumoniae</i><br>MGH 78578        | 5.32 | NCBI | 272620 |   | genus | Klebsiella    |
| <i>Klebsiella pneumoniae</i> subsp. <i>rhinoscleromatis</i><br>ATCC 13884 | 5.45 | HMP  | 667127 |   | genus | Klebsiella    |
| <i>Klebsiella</i> sp. 1_1_55                                              | 5.46 | HMP  | 469608 | * | genus | Klebsiella    |
| <i>Klebsiella variicola</i> At-22                                         | 5.46 | NCBI | 640131 |   | genus | Klebsiella    |
| <i>Kocuria rhizophila</i> DC2201                                          | 2.7  | NCBI | 378753 |   | genus | Kocuria       |
| <i>Kosmotoga olearia</i> TBF 19.5.1                                       | 2.3  | NCBI | 521045 |   | genus | Kosmotoga     |
| <i>Kribbella flavida</i> DSM 17836                                        | 7.58 | NCBI | 479435 |   | genus | Kribbella     |
| <i>Kytococcus sedentarius</i> DSM 20547                                   | 2.79 | NCBI | 478801 |   | genus | Kytococcus    |
| <i>Lactobacillus acidophilus</i> ATCC 4796                                | 2.02 | HMP  | 525306 | * | genus | Lactobacillus |
| <i>Lactobacillus acidophilus</i> NCFM                                     | 1.99 | NCBI | 272621 | * | genus | Lactobacillus |
| <i>Lactobacillus amylolyticus</i> DSM 11664                               | 1.54 | HMP  | 585524 | * | genus | Lactobacillus |
| <i>Lactobacillus antri</i> DSM 16041                                      | 2.3  | HMP  | 525309 | * | genus | Lactobacillus |
| <i>Lactobacillus brevis</i> ATCC 367                                      | 2.29 | NCBI | 387344 | * | genus | Lactobacillus |
| <i>Lactobacillus brevis</i> subsp. <i>gravesensis</i> ATCC<br>27305       | 3.14 | HMP  | 525310 | * | genus | Lactobacillus |
| <i>Lactobacillus buchneri</i> ATCC 11577                                  | 2.91 | HMP  | 525318 | * | genus | Lactobacillus |
| <i>Lactobacillus casei</i> ATCC 334                                       | 2.9  | NCBI | 321967 | * | genus | Lactobacillus |
| <i>Lactobacillus casei</i> BL23                                           | 3.08 | NCBI | 543734 | * | genus | Lactobacillus |
| <i>Lactobacillus coleohominis</i> 101-4-CHN                               | 1.73 | HMP  | 575594 |   | genus | Lactobacillus |
| <i>Lactobacillus crispatus</i> 125-2-CHN                                  | 2.31 | HMP  | 575595 | * | genus | Lactobacillus |
| <i>Lactobacillus crispatus</i> 214-1                                      | 2.07 | HMP  | 679188 | * | genus | Lactobacillus |
| <i>Lactobacillus crispatus</i> JV-V01                                     | 2.22 | HMP  | 491076 | * | genus | Lactobacillus |
| <i>Lactobacillus crispatus</i> MV-1A-US                                   | 2.31 | HMP  | 575596 | * | genus | Lactobacillus |
| <i>Lactobacillus crispatus</i> MV-3A-US                                   | 2.44 | HMP  | 575597 | * | genus | Lactobacillus |
| <i>Lactobacillus crispatus</i> ST1                                        | 2.04 | NCBI | 748671 | * | genus | Lactobacillus |
| <i>Lactobacillus delbrueckii</i> subsp. <i>bulgaricus</i><br>ATCC 11842   | 1.86 | NCBI | 390333 | * | genus | Lactobacillus |
| <i>Lactobacillus delbrueckii</i> subsp. <i>bulgaricus</i><br>ATCC BAA-365 | 1.86 | NCBI | 321956 | * | genus | Lactobacillus |
| <i>Lactobacillus fermentum</i> 28-3-CHN                                   | 2.03 | HMP  | 575599 | * | genus | Lactobacillus |
| <i>Lactobacillus fermentum</i> ATCC 14931                                 | 1.87 | HMP  | 525325 | * | genus | Lactobacillus |
| <i>Lactobacillus fermentum</i> IFO 3956                                   | 2.1  | NCBI | 334390 | * | genus | Lactobacillus |
| <i>Lactobacillus gasseri</i> 202-4                                        | 1.82 | HMP  | 630527 |   | genus | Lactobacillus |
| <i>Lactobacillus gasseri</i> 224-1                                        | 2.01 | HMP  | 679196 |   | genus | Lactobacillus |
| <i>Lactobacillus gasseri</i> ATCC 33323                                   | 1.89 | NCBI | 324831 | * | genus | Lactobacillus |
| <i>Lactobacillus gasseri</i> JV-V03                                       | 2.01 | HMP  | 525326 |   | genus | Lactobacillus |
| <i>Lactobacillus gasseri</i> MV-22                                        | 1.93 | HMP  | 559301 |   | genus | Lactobacillus |
| <i>Lactobacillus helveticus</i> DPC 4571                                  | 2.08 | NCBI | 405566 | * | genus | Lactobacillus |
| <i>Lactobacillus helveticus</i> DSM 20075                                 | 2.02 | HMP  | 585520 | * | genus | Lactobacillus |
| <i>Lactobacillus hilgardii</i> ATCC 8290                                  | 2.72 | HMP  | 525327 | * | genus | Lactobacillus |
| <i>Lactobacillus iners</i> DSM 13335                                      | 1.28 | HMP  | 525328 |   | genus | Lactobacillus |

|                                                                   |      |      |        |   |       |               |
|-------------------------------------------------------------------|------|------|--------|---|-------|---------------|
| <i>Lactobacillus jensenii</i> 1153                                | 1.76 | HMP  | 440497 |   | genus | Lactobacillus |
| <i>Lactobacillus jensenii</i> 115-3-CHN                           | 1.65 | HMP  | 575605 |   | genus | Lactobacillus |
| <i>Lactobacillus jensenii</i> 208-1                               | 3.33 | HMP  | 596326 |   | genus | Lactobacillus |
| <i>Lactobacillus jensenii</i> 269-3                               | 1.69 | HMP  | 596325 |   | genus | Lactobacillus |
| <i>Lactobacillus jensenii</i> 27-2-CHN                            | 1.66 | HMP  | 575606 |   | genus | Lactobacillus |
| <i>Lactobacillus jensenii</i> JV-V16                              | 1.59 | HMP  | 525329 |   | genus | Lactobacillus |
| <i>Lactobacillus jensenii</i> SJ-7A-US                            | 1.72 | HMP  | 575607 |   | genus | Lactobacillus |
| <i>Lactobacillus johnsonii</i> ATCC 33200                         | 1.78 | HMP  | 525330 |   | genus | Lactobacillus |
| <i>Lactobacillus johnsonii</i> FI9785                             | 1.76 | NCBI | 633699 |   | genus | Lactobacillus |
| <i>Lactobacillus johnsonii</i> NCC 533                            | 1.99 | NCBI | 257314 | * | genus | Lactobacillus |
| <i>Lactobacillus paracasei</i> subsp. <i>paracasei</i> 8700:2     | 3    | HMP  | 537973 | * | genus | Lactobacillus |
| <i>Lactobacillus paracasei</i> subsp. <i>paracasei</i> ATCC 25302 | 2.99 | HMP  | 525337 | * | genus | Lactobacillus |
| <i>Lactobacillus plantarum</i> JDM1                               | 3.2  | NCBI | 644042 | * | genus | Lactobacillus |
| <i>Lactobacillus plantarum</i> subsp. <i>plantarum</i> ATCC 14917 | 3.25 | HMP  | 525338 | * | genus | Lactobacillus |
| <i>Lactobacillus plantarum</i> WCFS1                              | 3.31 | NCBI | 220668 | * | genus | Lactobacillus |
| <i>Lactobacillus reuteri</i> CF48-3A                              | 2.11 | HMP  | 525341 | * | genus | Lactobacillus |
| <i>Lactobacillus reuteri</i> DSM 20016                            | 2    | NCBI | 557436 | * | genus | Lactobacillus |
| <i>Lactobacillus reuteri</i> JCM 1112                             | 2.04 | NCBI | 557433 | * | genus | Lactobacillus |
| <i>Lactobacillus reuteri</i> MM2-3                                | 2.02 | HMP  | 585517 | * | genus | Lactobacillus |
| <i>Lactobacillus reuteri</i> MM4-1A                               | 1.97 | HMP  | 548485 | * | genus | Lactobacillus |
| <i>Lactobacillus reuteri</i> SD2112                               | 2.2  | HMP  | 491077 | * | genus | Lactobacillus |
| <i>Lactobacillus rhamnosus</i> GG                                 | 6.02 | NCBI | 568703 | * | genus | Lactobacillus |
| <i>Lactobacillus rhamnosus</i> Lc 705                             | 2.97 | NCBI | 568704 | * | genus | Lactobacillus |
| <i>Lactobacillus rhamnosus</i> LMS2-1                             | 3.16 | HMP  | 525361 | * | genus | Lactobacillus |
| <i>Lactobacillus ruminis</i> ATCC 25644                           | 2.16 | HMP  | 525362 | * | genus | Lactobacillus |
| <i>Lactobacillus sakei</i> subsp. <i>sakei</i> 23K                | 1.88 | NCBI | 314315 | * | genus | Lactobacillus |
| <i>Lactobacillus salivarius</i> ATCC 11741                        | 2.02 | HMP  | 525364 | * | genus | Lactobacillus |
| <i>Lactobacillus salivarius</i> UCC118                            | 1.83 | NCBI | 362948 | * | genus | Lactobacillus |
| <i>Lactobacillus ultunensis</i> DSM 16047                         | 2.25 | HMP  | 525365 | * | genus | Lactobacillus |
| <i>Lactobacillus vaginalis</i> ATCC 49540                         | 1.88 | HMP  | 525366 |   | genus | Lactobacillus |
| <i>Lactococcus lactis</i> subsp. <i>cremoris</i> MG1363           | 2.53 | NCBI | 416870 |   | genus | Lactococcus   |
| <i>Lactococcus lactis</i> subsp. <i>cremoris</i> SK11             | 2.44 | NCBI | 272622 |   | genus | Lactococcus   |
| <i>Lactococcus lactis</i> subsp. <i>lactis</i> II1403             | 2.37 | NCBI | 272623 |   | genus | Lactococcus   |
| <i>Lactococcus lactis</i> subsp. <i>lactis</i> KF147              | 2.6  | NCBI | 684738 |   | genus | Lactococcus   |
| <i>Laribacter hongkongensis</i> HLHK9                             | 3.17 | NCBI | 557598 |   | genus | Laribacter    |
| <i>Lawsonia intracellularis</i> PHE/MN1-00                        | 1.46 | NCBI | 363253 |   | genus | Lawsonia      |
| <i>Legionella longbeachae</i> NSW150                              | 4.08 | NCBI | 661367 |   | genus | Legionella    |
| <i>Legionella pneumophila</i> 2300/99 Alcoy                       | 3.52 | NCBI | 423212 |   | genus | Legionella    |
| <i>Legionella pneumophila</i> str. Corby                          | 3.58 | NCBI | 400673 |   | genus | Legionella    |

|                                                                             |      |      |        |   |        |                  |
|-----------------------------------------------------------------------------|------|------|--------|---|--------|------------------|
| <i>Legionella pneumophila</i> str. Lens                                     | 3.35 | NCBI | 297245 |   | genus  | Legionella       |
| <i>Legionella pneumophila</i> str. Paris                                    | 3.5  | NCBI | 297246 |   | genus  | Legionella       |
| <i>Legionella pneumophila</i> subsp. <i>pneumophila</i> str. Philadelphia 1 | 3.4  | NCBI | 272624 |   | genus  | Legionella       |
| <i>Leifsonia xyli</i> subsp. <i>xyli</i> str. CTCB07                        | 2.58 | NCBI | 281090 |   | genus  | Leifsonia        |
| <i>Leptospira biflexa</i> serovar Patoc strain 'Patoc 1 (Ames)'             | 3.88 | NCBI | 355278 |   | genus  | Leptospira       |
| <i>Leptospira biflexa</i> serovar Patoc strain 'Patoc 1 (Paris)'            | 3.88 | NCBI | 456481 |   | genus  | Leptospira       |
| <i>Leptospira borgpetersenii</i> serovar Hardjo- <i>bovis</i> JB197         | 3.88 | NCBI | 355277 |   | genus  | Leptospira       |
| <i>Leptospira borgpetersenii</i> serovar Hardjo- <i>bovis</i> L550          | 3.93 | NCBI | 355276 |   | genus  | Leptospira       |
| <i>Leptospira interrogans</i> serovar Copenhageni str. Fiocruz L1-130       | 4.63 | NCBI | 267671 |   | genus  | Leptospira       |
| <i>Leptospira interrogans</i> serovar Lai str. 56601                        | 4.7  | NCBI | 189518 |   | genus  | Leptospira       |
| <i>Leptothrix cholodnii</i> SP-6                                            | 4.91 | NCBI | 395495 |   | genus  | Leptothrix       |
| <i>Leptotrichia buccalis</i> C-1013-b                                       | 2.47 | NCBI | 523794 |   | genus  | Leptotrichia     |
| <i>Leptotrichia goodfellowii</i> F0264                                      | 2.29 | HMP  | 596323 |   | genus  | Leptotrichia     |
| <i>Leptotrichia hofstadii</i> F0254                                         | 2.46 | HMP  | 634994 |   | genus  | Leptotrichia     |
| <i>Leuconostoc citreum</i> KM20                                             | 1.8  | NCBI | 349519 |   | genus  | Leuconostoc      |
| <i>Leuconostoc kimchii</i> IMSNU 11154                                      | 2    | NCBI | 762051 |   | genus  | Leuconostoc      |
| <i>Leuconostoc mesenteroides</i> subsp. <i>cremoris</i> ATCC 19254          | 1.74 | HMP  | 586220 | * | genus  | Leuconostoc      |
| <i>Leuconostoc mesenteroides</i> subsp. <i>mesenteroides</i> ATCC 8293      | 2.04 | NCBI | 203120 | * | genus  | Leuconostoc      |
| <i>Listeria grayi</i> DSM 20601                                             | 2.59 | HMP  | 525367 | * | genus  | Listeria         |
| <i>Listeria innocua</i> Clip11262                                           | 3.01 | NCBI | 272626 | * | genus  | Listeria         |
| <i>Listeria monocytogenes</i> 08-5578                                       | 3.03 | NCBI | 653938 |   | genus  | Listeria         |
| <i>Listeria monocytogenes</i> 08-5923                                       | 3    | NCBI | 637381 |   | genus  | Listeria         |
| <i>Listeria monocytogenes</i> Clip80459                                     | 2.91 | NCBI | 634178 |   | genus  | Listeria         |
| <i>Listeria monocytogenes</i> EGD-e                                         | 2.94 | NCBI | 169963 |   | genus  | Listeria         |
| <i>Listeria monocytogenes</i> HCC23                                         | 2.98 | NCBI | 552536 |   | genus  | Listeria         |
| <i>Listeria monocytogenes</i> str. 4b F2365                                 | 2.91 | NCBI | 265669 |   | genus  | Listeria         |
| <i>Listeria seeligeri</i> serovar 1/2b str. SLCC3954                        | 2.8  | NCBI | 683837 |   | genus  | Listeria         |
| <i>Listeria welshimeri</i> serovar 6b str. SLCC5334                         | 2.81 | NCBI | 386043 |   | genus  | Listeria         |
| <i>Lysinibacillus sphaericus</i> C3-41                                      | 4.64 | NCBI | 444177 |   | genus  | Lysinibacillus   |
| <i>Macrococcus caseolyticus</i> JCSC5402                                    | 2.1  | NCBI | 458233 |   | genus  | Macrococcus      |
| <i>Magnetococcus</i> sp. MC-1                                               | 4.72 | NCBI | 156889 |   | phylum | Proteobacteria   |
| <i>Magnetospirillum magneticum</i> AMB-1                                    | 4.97 | NCBI | 342108 |   | genus  | Magnetospirillum |
| <i>Mannheimia succiniciproducens</i> MBEL55E                                | 2.31 | NCBI | 221988 | * | family | Pasteurellaceae  |
| <i>Maricaulis maris</i> MCS10                                               | 3.37 | NCBI | 394221 |   | genus  | Maricaulis       |
| <i>Marinobacter aquaeolei</i> VT8                                           | 4.33 | NCBI | 351348 |   | genus  | Marinobacter     |
| <i>Marinomonas</i> sp. MWYL1                                                | 5.1  | NCBI | 400668 |   | genus  | Marinomonas      |

|                                                            |      |         |        |   |        |                     |
|------------------------------------------------------------|------|---------|--------|---|--------|---------------------|
| <i>Megamonas hypermegale</i> ART12/1                       | 2.21 | MetaHIT | 657316 | * |        |                     |
| <i>Megasphaera genomosp. type_1 str. 28L</i>               | 1.73 | HMP     | 699218 |   | genus  | Megasphaera         |
| <i>Meiothermus ruber</i> DSM 1279                          | 3.1  | NCBI    | 504728 |   | genus  | Meiothermus         |
| <i>Meiothermus silvanus</i> DSM 9946                       | 3.25 | NCBI    | 526227 |   | genus  | Meiothermus         |
| <i>Mesoplasma florum</i> L1                                | 0.79 | NCBI    | 265311 |   | genus  | Mesoplasma          |
| <i>Mesorhizobium loti</i> MAFF303099                       | 7.04 | NCBI    | 266835 |   | genus  | Mesorhizobium       |
| <i>Metallosphaera sedula</i> DSM 5348                      | 2.19 | NCBI    | 399549 |   | genus  | Metallosphaera      |
| <i>Methanobrevibacter ruminantium</i> M1                   | 2.94 | NCBI    | 634498 |   | genus  | Methanobrevibacter  |
| <i>Methanobrevibacter smithii</i> ATCC 35061               | 1.85 | NCBI    | 420247 | * | genus  | Methanobrevibacter  |
| <i>Methanobrevibacter smithii</i> DSM 2374                 | 1.73 | HMP     | 521002 | * | genus  | Methanobrevibacter  |
| <i>Methanobrevibacter smithii</i> DSM 2375                 | 1.71 | HMP     | 483214 | * | genus  | Methanobrevibacter  |
| <i>Methanocaldococcus fervens</i> AG86                     | 1.49 | NCBI    | 573064 |   | genus  | Methanocaldococcus  |
| <i>Methanocaldococcus infernus</i> ME                      | 1.33 | NCBI    | 573063 |   | genus  | Methanocaldococcus  |
| <i>Methanocaldococcus jannaschii</i> DSM 2661              | 1.66 | NCBI    | 243232 |   | genus  | Methanocaldococcus  |
| <i>Methanocaldococcus sp. FS406-22</i>                     | 1.76 | NCBI    | 644281 |   | genus  | Methanocaldococcus  |
| <i>Methanocaldococcus vulcanius</i> M7                     | 1.75 | NCBI    | 579137 |   | genus  | Methanocaldococcus  |
| <i>Methanocella paludicola</i> SANA E                      | 2.96 | NCBI    | 304371 |   | genus  | Methanocella        |
| <i>Methanococcoides burtonii</i> DSM 6242                  | 2.58 | NCBI    | 259564 |   | genus  | Methanococcoides    |
| <i>Methanococcus aeolicus</i> Nankai-3                     | 1.57 | NCBI    | 419665 |   | genus  | Methanococcus       |
| <i>Methanococcus maripaludis</i> C5                        | 1.78 | NCBI    | 402880 |   | genus  | Methanococcus       |
| <i>Methanococcus maripaludis</i> C6                        | 1.74 | NCBI    | 444158 |   | genus  | Methanococcus       |
| <i>Methanococcus maripaludis</i> C7                        | 1.77 | NCBI    | 426368 |   | genus  | Methanococcus       |
| <i>Methanococcus maripaludis</i> S2                        | 1.66 | NCBI    | 267377 |   | genus  | Methanococcus       |
| <i>Methanococcus vannielii</i> SB                          | 1.72 | NCBI    | 406327 |   | genus  | Methanococcus       |
| <i>Methanococcus voltae</i> A3                             | 1.94 | NCBI    | 456320 |   | genus  | Methanococcus       |
| <i>Methanocorpusculum labreanum</i> Z                      | 1.8  | NCBI    | 410358 |   | genus  | Methanocorpusculum  |
| <i>Methanoculleus marisnigri</i> JR1                       | 2.48 | NCBI    | 368407 |   | genus  | Methanoculleus      |
| <i>Methanohalobium evestigatum</i> Z-7303                  | 2.24 | NCBI    | 644295 |   | family | Methanosarcinaceae  |
| <i>Methanohalophilus mahii</i> DSM 5219                    | 2.01 | NCBI    | 547558 |   | genus  | Methanohalophilus   |
| <i>Methanopyrus kandleri</i> AV19                          | 1.69 | NCBI    | 190192 |   | genus  | Methanopyrus        |
| <i>Methanosaeta thermophila</i> PT                         | 1.88 | NCBI    | 349307 |   | genus  | Methanosaeta        |
| <i>Methanosarcina acetivorans</i> C2A                      | 5.75 | NCBI    | 188937 |   | genus  | Methanosarcina      |
| <i>Methanosarcina barkeri</i> str. Fusaro                  | 4.84 | NCBI    | 269797 |   | genus  | Methanosarcina      |
| <i>Methanosarcina mazei</i> Go1                            | 4.1  | NCBI    | 192952 |   | genus  | Methanosarcina      |
| <i>Methanosphaera stadtmanae</i> DSM 3091                  | 1.77 | NCBI    | 339860 | * | genus  | Methanosphaera      |
| <i>Methanosphaerula palustris</i> E1-9c                    | 2.92 | NCBI    | 521011 |   | genus  | Methanosphaerula    |
| <i>Methanospirillum hungatei</i> JF-1                      | 3.54 | NCBI    | 323259 |   | genus  | Methanospirillum    |
| <i>Methanothermobacter thermautotrophicus</i> str. Delta H | 1.75 | NCBI    | 187420 |   | genus  | Methanothermobacter |
| <i>Methylacidiphilum infernorum</i> V4                     | 2.29 | NCBI    | 481448 |   | phylum | Verrucomicrobia     |
| <i>Methylibium petroleiphilum</i> PM1                      | 4.04 | NCBI    | 420662 |   | genus  | Methylibium         |

|                                                                |      |      |        |   |        |                    |
|----------------------------------------------------------------|------|------|--------|---|--------|--------------------|
| <i>Methylobacillus flagellatus</i> KT                          | 2.97 | NCBI | 265072 |   | genus  | Methylobacillus    |
| <i>Methylobacterium chloromethanicum</i> CM4                   | 5.78 | NCBI | 440085 |   | genus  | Methylobacterium   |
| <i>Methylobacterium extorquens</i> AM1                         | 5.51 | NCBI | 272630 |   | genus  | Methylobacterium   |
| <i>Methylobacterium extorquens</i> DM4                         | 5.94 | NCBI | 661410 |   | genus  | Methylobacterium   |
| <i>Methylobacterium extorquens</i> PA1                         | 5.47 | NCBI | 419610 |   | genus  | Methylobacterium   |
| <i>Methylobacterium nodulans</i> ORS 2060                      | 7.77 | NCBI | 460265 |   | genus  | Methylobacterium   |
| <i>Methylobacterium populi</i> BJ001                           | 5.8  | NCBI | 441620 |   | genus  | Methylobacterium   |
| <i>Methylobacterium radiotolerans</i> JCM 2831                 | 6.08 | NCBI | 426355 |   | genus  | Methylobacterium   |
| <i>Methylobacterium</i> sp. 4-46                               | 7.66 | NCBI | 426117 |   | genus  | Methylobacterium   |
| <i>Methylocella silvestris</i> BL2                             | 4.31 | NCBI | 395965 |   | genus  | Methylocella       |
| <i>Methylococcus capsulatus</i> str. Bath                      | 3.3  | NCBI | 243233 |   | genus  | Methylococcus      |
| <i>Methylotenera mobilis</i> JLW8                              | 2.55 | NCBI | 583345 |   | genus  | Methylotenera      |
| <i>Methylotenera</i> sp. 301                                   | 3.06 | NCBI | 666681 |   | family | Methylophilaceae   |
| <i>Methylovorus</i> sp. SIP3-4                                 | 3    | NCBI | 582744 |   | genus  | Methylovorus       |
| <i>Micrococcus luteus</i> NCTC 2665                            | 2.5  | NCBI | 465515 |   | genus  | Micrococcus        |
| <i>Micrococcus luteus</i> SK58                                 | 2.31 | HMP  | 596312 |   | genus  | Micrococcus        |
| <i>Microcystis aeruginosa</i> NIES-843                         | 5.84 | NCBI | 449447 |   | genus  | Cyanobacteria GpXI |
| <i>Mitsuokella multacida</i> DSM 20544                         | 2.58 | HMP  | 500635 | * | genus  | Mitsuokella        |
| <i>Mobiluncus curtisii</i> ATCC 43063                          | 4.33 | NCBI | 548479 |   | genus  | Mobiluncus         |
| <i>Mobiluncus mulieris</i> 28-1                                | 2.45 | HMP  | 596328 |   | genus  | Mobiluncus         |
| <i>Mobiluncus mulieris</i> ATCC 35243                          | 2.44 | HMP  | 585199 |   | genus  | Mobiluncus         |
| <i>Mollicutes bacterium</i> D7                                 | 3.56 | HMP  | 556270 |   | genus  | Coprobacillus      |
| <i>Moorella thermoacetica</i> ATCC 39073                       | 2.63 | NCBI | 264732 |   | genus  | Moorella           |
| <i>Moraxella catarrhalis</i> RH4                               | 1.86 | NCBI | 749219 |   | genus  | Moraxella          |
| <i>Mycobacterium abscessus</i> ATCC 19977                      | 5.07 | NCBI | 561007 |   | genus  | Mycobacterium      |
| <i>Mycobacterium avium</i> 104                                 | 5.48 | NCBI | 243243 |   | genus  | Mycobacterium      |
| <i>Mycobacterium avium</i> subsp. <i>paratuberculosis</i> K-10 | 4.83 | NCBI | 262316 |   | genus  | Mycobacterium      |
| <i>Mycobacterium bovis</i> AF2122/97                           | 4.35 | NCBI | 233413 |   | genus  | Mycobacterium      |
| <i>Mycobacterium bovis</i> BCG str. <i>Pasteur</i> 1173P2      | 4.37 | NCBI | 410289 |   | genus  | Mycobacterium      |
| <i>Mycobacterium bovis</i> BCG str. <i>Tokyo</i> 172           | 4.37 | NCBI | 561275 |   | genus  | Mycobacterium      |
| <i>Mycobacterium gilvum</i> PYR-GCK                            | 5.62 | NCBI | 350054 |   | genus  | Mycobacterium      |
| <i>Mycobacterium leprae</i> Br4923                             | 2.67 | NCBI | 561304 |   | genus  | Mycobacterium      |
| <i>Mycobacterium leprae</i> TN                                 | 3.27 | NCBI | 272631 |   | genus  | Mycobacterium      |
| <i>Mycobacterium marinum</i> M                                 | 6.64 | NCBI | 216594 |   | genus  | Mycobacterium      |
| <i>Mycobacterium parascrofulaceum</i> ATCC BAA-614             | 6.56 | HMP  | 525368 |   | genus  | Mycobacterium      |
| <i>Mycobacterium smegmatis</i> str. MC2 155                    | 6.99 | NCBI | 246196 |   | genus  | Mycobacterium      |
| <i>Mycobacterium</i> sp. JLS                                   | 6.05 | NCBI | 164757 |   | genus  | Mycobacterium      |
| <i>Mycobacterium</i> sp. KMS                                   | 5.74 | NCBI | 189918 |   | genus  | Mycobacterium      |
| <i>Mycobacterium</i> sp. MCS                                   | 5.71 | NCBI | 164756 |   | genus  | Mycobacterium      |

|                                                                  |      |      |        |   |        |                    |
|------------------------------------------------------------------|------|------|--------|---|--------|--------------------|
| <i>Mycobacterium tuberculosis</i> CDC1551                        | 4.4  | NCBI | 83331  |   | genus  | Mycobacterium      |
| <i>Mycobacterium tuberculosis</i> F11                            | 4.42 | NCBI | 336982 |   | genus  | Mycobacterium      |
| <i>Mycobacterium tuberculosis</i> H37Ra                          | 4.42 | NCBI | 419947 |   | genus  | Mycobacterium      |
| <i>Mycobacterium tuberculosis</i> H37Rv                          | 4.41 | NCBI | 83332  |   | genus  | Mycobacterium      |
| <i>Mycobacterium tuberculosis</i> KZN 1435                       | 4.4  | NCBI | 478434 |   | genus  | Mycobacterium      |
| <i>Mycobacterium ulcerans</i> Agy99                              | 5.63 | NCBI | 362242 |   | genus  | Mycobacterium      |
| <i>Mycobacterium vanbaalenii</i> PYR-1                           | 6.49 | NCBI | 350058 |   | genus  | Mycobacterium      |
| <i>Mycoplasma agalactiae</i>                                     | 1.01 | NCBI | 2110   |   | genus  | Mycoplasma         |
| <i>Mycoplasma agalactiae</i> PG2                                 | 0.88 | NCBI | 347257 |   | genus  | Mycoplasma         |
| <i>Mycoplasma arthritidis</i> 158L3-1                            | 0.82 | NCBI | 243272 |   | genus  | Mycoplasma         |
| <i>Mycoplasma capricolum</i> subsp. <i>capricolum</i> ATCC 27343 | 1.01 | NCBI | 340047 |   | family | Entomoplasmataceae |
| <i>Mycoplasma conjunctivae</i> HRC/581                           | 0.85 | NCBI | 572263 |   | genus  | Mycoplasma         |
| <i>Mycoplasma crocodyli</i> MP145                                | 0.93 | NCBI | 512564 |   | genus  | Mycoplasma         |
| <i>Mycoplasma gallisepticum</i> str. <i>R(low)</i>               | 1.01 | NCBI | 710127 |   | genus  | Mycoplasma         |
| <i>Mycoplasma genitalium</i> G37                                 | 0.58 | NCBI | 243273 |   | genus  | Mycoplasma         |
| <i>Mycoplasma hominis</i>                                        | 0.67 | NCBI | 2098   | * | genus  | Mycoplasma         |
| <i>Mycoplasma hyopneumoniae</i> 232                              | 0.89 | NCBI | 295358 |   | genus  | Mycoplasma         |
| <i>Mycoplasma hyopneumoniae</i> 7448                             | 0.92 | NCBI | 262722 |   | genus  | Mycoplasma         |
| <i>Mycoplasma hyopneumoniae</i> J                                | 0.9  | NCBI | 262719 |   | genus  | Mycoplasma         |
| <i>Mycoplasma mobile</i> 163K                                    | 0.78 | NCBI | 267748 |   | genus  | Mycoplasma         |
| <i>Mycoplasma mycoides</i> subsp. <i>mycoides</i> SC str. PG1    | 1.21 | NCBI | 272632 |   | family | Entomoplasmataceae |
| <i>Mycoplasma penetrans</i> HF-2                                 | 1.36 | NCBI | 272633 |   | genus  | Mycoplasma         |
| <i>Mycoplasma pneumoniae</i> M129                                | 0.82 | NCBI | 272634 |   | genus  | Mycoplasma         |
| <i>Mycoplasma pulmonis</i> UAB CTIP                              | 0.96 | NCBI | 272635 |   | genus  | Mycoplasma         |
| <i>Mycoplasma synoviae</i> 53                                    | 0.8  | NCBI | 262723 |   | genus  | Mycoplasma         |
| <i>Myxococcus xanthus</i> DK 1622                                | 9.14 | NCBI | 246197 |   | genus  | Myxococcus         |
| <i>Nakamurella multipartita</i> DSM 44233                        | 6.06 | NCBI | 479431 |   | genus  | Nakamurella        |
| <i>Nanoarchaeum equitans</i> Kin4-M                              | 0.49 | NCBI | 228908 |   | genus  | Nanoarchaeum       |
| <i>Natranaerobius thermophilus</i> JW/NM-WN-LF                   | 3.17 | NCBI | 457570 |   | genus  | Natranaerobius     |
| <i>Natrialba magadii</i> ATCC 43099                              | 3.75 | NCBI | 547559 |   | genus  | Natrialba          |
| <i>Natronomonas pharaonis</i> DSM 2160                           | 2.6  | NCBI | 348780 |   | genus  | Natronomonas       |
| <i>Nautilia profundicola</i> AmH                                 | 1.68 | NCBI | 598659 |   | genus  | Nautilia           |
| <i>Neisseria cinerea</i> ATCC 14685                              | 1.87 | HMP  | 546262 |   | genus  | Neisseria          |
| <i>Neisseria elongata</i> subsp. <i>glycolytica</i> ATCC 29315   | 2.34 | HMP  | 546263 |   | genus  | Neisseria          |
| <i>Neisseria flavescens</i> NRL30031/H210                        | 2.21 | HMP  | 546264 |   | genus  | Neisseria          |
| <i>Neisseria flavescens</i> SK114                                | 2.2  | HMP  | 596320 |   | genus  | Neisseria          |
| <i>Neisseria gonorrhoeae</i> FA 1090                             | 2.15 | NCBI | 242231 |   | genus  | Neisseria          |
| <i>Neisseria gonorrhoeae</i> NCCP11945                           | 2.23 | NCBI | 521006 |   | genus  | Neisseria          |
| <i>Neisseria lactamica</i> ATCC 23970                            | 2.17 | HMP  | 546265 |   |        |                    |

|                                                                       |      |      |        |   |       |                        |
|-----------------------------------------------------------------------|------|------|--------|---|-------|------------------------|
| <i>Neisseria meningitidis</i> 053442                                  | 2.15 | NCBI | 374833 |   | genus | <i>Neisseria</i>       |
| <i>Neisseria meningitidis</i> alpha14                                 | 2.15 | NCBI | 662598 |   | genus | <i>Neisseria</i>       |
| <i>Neisseria meningitidis</i> FAM18                                   | 2.19 | NCBI | 272831 |   | genus | <i>Neisseria</i>       |
| <i>Neisseria meningitidis</i> MC58                                    | 2.27 | NCBI | 122586 |   | genus | <i>Neisseria</i>       |
| <i>Neisseria meningitidis</i> Z2491                                   | 2.18 | NCBI | 122587 |   | genus | <i>Neisseria</i>       |
| <i>Neisseria mucosa</i> ATCC 25996                                    | 2.58 | HMP  | 546266 |   | genus | <i>Neisseria</i>       |
| <i>Neisseria polysaccharea</i> ATCC 43768                             | 2.03 | HMP  | 546267 |   | genus | <i>Neisseria</i>       |
| <i>Neisseria sicca</i> ATCC 29256                                     | 2.83 | HMP  | 547045 |   | genus | <i>Neisseria</i>       |
| <i>Neisseria subflava</i> NJ9703                                      | 2.29 | HMP  | 546268 |   | genus | <i>Neisseria</i>       |
| <i>Neorickettsia risticii</i> str. Illinois                           | 0.88 | NCBI | 434131 |   | genus | <i>Neorickettsia</i>   |
| <i>Neorickettsia sennetsu</i> str. Miyayama                           | 0.86 | NCBI | 222891 |   | genus | <i>Neorickettsia</i>   |
| <i>Nitratiruptor</i> sp. SB155-2                                      | 1.88 | NCBI | 387092 |   | genus | <i>Nitratiruptor</i>   |
| <i>Nitrobacter hamburgensis</i> X14                                   | 4.41 | NCBI | 323097 |   | genus | <i>Nitrobacter</i>     |
| <i>Nitrobacter winogradskyi</i> Nb-255                                | 3.4  | NCBI | 323098 |   | genus | <i>Nitrobacter</i>     |
| <i>Nitrosococcus halophilus</i> Nc4                                   | 4.08 | NCBI | 472759 |   | genus | <i>Nitrosococcus</i>   |
| <i>Nitrosococcus oceani</i> ATCC 19707                                | 3.48 | NCBI | 323261 |   | genus | <i>Nitrosococcus</i>   |
| <i>Nitrosococcus watsoni</i> C-113                                    | 3.33 | NCBI | 105559 |   | genus | <i>Nitrosococcus</i>   |
| <i>Nitrosomonas europaea</i> ATCC 19718                               | 2.81 | NCBI | 228410 |   | genus | <i>Nitrosomonas</i>    |
| <i>Nitrosomonas eutropha</i> C91                                      | 2.66 | NCBI | 335283 |   | genus | <i>Nitrosomonas</i>    |
| <i>Nitrosopumilus maritimus</i> SCM1                                  | 1.65 | NCBI | 436308 |   | class | Thermoprotei           |
| <i>Nitrospira multififormis</i> ATCC 25196                            | 3.18 | NCBI | 323848 |   | genus | <i>Nitrospira</i>      |
| <i>Nocardia farcinica</i> IFM 10152                                   | 6.02 | NCBI | 247156 |   | genus | <i>Nocardia</i>        |
| <i>Nocardioides</i> sp. JS614                                         | 4.99 | NCBI | 196162 |   | genus | <i>Nocardioides</i>    |
| <i>Nocardiopsis dassonvillei</i> subsp. <i>dassonvillei</i> DSM 43111 | 5.77 | NCBI | 446468 |   | genus | <i>Nocardiopsis</i>    |
| ' <i>Nostoc azollae</i> ' 0708                                        | 5.35 | NCBI | 551115 |   | genus | Cyanobacteria Gpl      |
| <i>Nostoc punctiforme</i> PCC 73102                                   | 8.23 | NCBI | 63737  |   | genus | Cyanobacteria Gpl      |
| <i>Nostoc</i> sp. PCC 7120                                            | 6.41 | NCBI | 103690 |   | genus | Cyanobacteria Gpl      |
| <i>Novosphingobium aromaticivorans</i> DSM 12444                      | 3.56 | NCBI | 279238 |   | genus | <i>Novosphingobium</i> |
| <i>Oceanobacillus ihayensis</i> HTE831                                | 3.63 | NCBI | 221109 |   | genus | <i>Oceanobacillus</i>  |
| <i>Ochrobactrum anthropi</i> ATCC 49188                               | 4.78 | NCBI | 439375 |   | genus | <i>Ochrobactrum</i>    |
| <i>Oenococcus oeni</i> PSU-1                                          | 1.78 | NCBI | 203123 |   | genus | <i>Oenococcus</i>      |
| <i>Oligotropha carboxidovorans</i> OM5                                | 3.75 | NCBI | 504832 |   | genus | Afipia                 |
| <i>Onion yellows phytoplasma</i> OY-M                                 | 0.85 | NCBI | 262768 |   | genus | Acholeplasma           |
| <i>Opitutus terrae</i> PB90-1                                         | 5.96 | NCBI | 452637 |   | genus | <i>Opitutus</i>        |
| <i>Oribacterium sinus</i> F0268                                       | 2.71 | HMP  | 585501 |   | genus | <i>Oribacterium</i>    |
| <i>Oribacterium</i> sp. oral taxon 078 str. F0262                     | 2.68 | HMP  | 608534 |   | genus | <i>Oribacterium</i>    |
| <i>Orientia tsutsugamushi</i> str. Boryong                            | 2.13 | NCBI | 357244 |   | genus | <i>Orientia</i>        |
| <i>Orientia tsutsugamushi</i> str. Ikeda                              | 2.01 | NCBI | 334380 |   | genus | <i>Orientia</i>        |
| <i>Oxalobacter formigenes</i> HOxBLS                                  | 2.51 | HMP  | 556268 | * | genus | <i>Oxalobacter</i>     |

|                                                                             |      |      |        |   |       |                    |
|-----------------------------------------------------------------------------|------|------|--------|---|-------|--------------------|
| <i>Oxalobacter formigenes</i> OXCC13                                        | 2.44 | HMP  | 556269 | * | genus | Oxalobacter        |
| <i>Paenibacillus</i> sp. JDR-2                                              | 7.18 | NCBI | 324057 |   | genus | Paenibacillus      |
| <i>Paenibacillus</i> sp. oral taxon 786 str. D14                            | 5.1  | HMP  | 621372 |   | genus | Paenibacillus      |
| <i>Pantoea ananatis</i> LMG 20103                                           | 4.69 | NCBI | 706191 |   | genus | Pantoea            |
| <i>Parabacteroides distasonis</i> ATCC 8503                                 | 4.81 | NCBI | 435591 | * | genus | Parabacteroides    |
| <i>Parabacteroides johnsonii</i> DSM 18315                                  | 4.79 | HMP  | 537006 | * | genus | Parabacteroides    |
| <i>Parabacteroides merdae</i> ATCC 43184                                    | 4.43 | HMP  | 411477 | * | genus | Parabacteroides    |
| <i>Parabacteroides</i> sp. D13                                              | 5.37 | HMP  | 563193 | * | genus | Parabacteroides    |
| <i>Paracoccus denitrificans</i> PD1222                                      | 4.58 | NCBI | 318586 |   | genus | Paracoccus         |
| <i>Parascardovia denticolens</i> F0305                                      | 1.9  | HMP  | 641144 |   | genus | Parascardovia      |
| <i>Parvibaculum lavamentivorans</i> DS-1                                    | 3.91 | NCBI | 402881 |   | genus | Parvibaculum       |
| <i>Parvimonas micra</i> ATCC 33270                                          | 1.7  | HMP  | 411465 | * | genus | Parvimonas         |
| <i>Pasteurella dagmatis</i> ATCC 43325                                      | 2.26 | HMP  | 667128 |   | genus | Pasteurella        |
| <i>Pasteurella multocida</i> subsp. <i>multocida</i> str. Pm70              | 2.26 | NCBI | 272843 |   | genus | Pasteurella        |
| <i>Pectobacterium atrosepticum</i> SCRI1043                                 | 5.06 | NCBI | 218491 |   | genus | Pectobacterium     |
| <i>Pectobacterium carotovorum</i> subsp. <i>carotovorum</i> PC1             | 4.86 | NCBI | 561230 |   | genus | Serratia           |
| <i>Pectobacterium wasabiae</i> WPP163                                       | 5.06 | NCBI | 561231 |   | genus | Pectobacterium     |
| <i>Pediococcus acidilactici</i> 7_4                                         | 2.02 | HMP  | 563194 | * | genus | Pediococcus        |
| <i>Pediococcus pentosaceus</i> ATCC 25745                                   | 1.83 | NCBI | 278197 |   | genus | Pediococcus        |
| <i>Pedobacter heparinus</i> DSM 2366                                        | 5.17 | NCBI | 485917 |   | genus | Pedobacter         |
| <i>Pelobacter carbinolicus</i> DSM 2380                                     | 3.67 | NCBI | 338963 |   | genus | Pelobacter         |
| <i>Pelobacter propionicus</i> DSM 2379                                      | 4.01 | NCBI | 338966 |   | genus | Pelobacter         |
| <i>Pelodictyon phaeoclathratiforme</i> BU-1                                 | 3.02 | NCBI | 324925 |   | genus | Chlorobium         |
| <i>Pelotomaculum thermopropionicum</i> SI                                   | 3.03 | NCBI | 370438 |   | genus | Pelotomaculum      |
| <i>Peptoniphilus lacrimalis</i> 315-B                                       | 1.7  | HMP  | 596330 |   | genus | Peptoniphilus      |
| <i>Peptostreptococcus anaerobius</i> 653-L                                  | 2.08 | HMP  | 596329 |   | genus | Peptostreptococcus |
| <i>Persephonella marina</i> EX-H1                                           | 1.93 | NCBI | 123214 |   | genus | Persephonella      |
| <i>Petrotoga mobilis</i> SJ95                                               | 2.17 | NCBI | 403833 |   | genus | Petrotoga          |
| <i>Phenylobacterium zucineum</i> HLK1                                       | 4    | NCBI | 450851 |   | genus | Phenylobacterium   |
| <i>Photobacterium profundum</i> SS9                                         | 6.32 | NCBI | 298386 |   | genus | Photobacterium     |
| <i>Photorhabdus asymbiotica</i>                                             | 5.06 | NCBI | 291112 |   | genus | Photorhabdus       |
| <i>Photorhabdus luminescens</i> subsp. <i>laumondii</i> TTO1                | 5.69 | NCBI | 243265 |   | genus | Photorhabdus       |
| <i>Picrophilus torridus</i> DSM 9790                                        | 1.55 | NCBI | 263820 |   | genus | Picrophilus        |
| <i>Pirellula staleyi</i> DSM 6068                                           | 6.2  | NCBI | 530564 |   | genus | Pirellula          |
| <i>Planctomyces limnophilus</i> DSM 3776                                    | 5.42 | NCBI | 521674 |   | genus | Planctomyces       |
| <i>Polaromonas naphthalenivorans</i> CJ2                                    | 4.41 | NCBI | 365044 |   | genus | Polaromonas        |
| <i>Polaromonas</i> sp. JS666                                                | 5.2  | NCBI | 296591 |   | genus | Polaromonas        |
| <i>Polynucleobacter necessarius</i> subsp. <i>asymbioticus</i> QLW-P1DMWA-1 | 2.16 | NCBI | 312153 |   | genus | Polynucleobacter   |

|                                                                           |      |      |        |   |       |                     |
|---------------------------------------------------------------------------|------|------|--------|---|-------|---------------------|
| <i>Polynucleobacter necessarius</i> subsp. <i>necessarius</i> STIR1       | 1.56 | NCBI | 452638 |   | genus | Polynucleobacter    |
| <i>Porphyromonas endodontalis</i> ATCC 35406                              | 2.06 | HMP  | 553175 |   | genus | Porphyromonas       |
| <i>Porphyromonas gingivalis</i> ATCC 33277                                | 2.35 | NCBI | 431947 | * | genus | Porphyromonas       |
| <i>Porphyromonas gingivalis</i> W83                                       | 2.34 | NCBI | 242619 | * | genus | Porphyromonas       |
| <i>Porphyromonas uenonis</i> 60-3                                         | 2.24 | HMP  | 596327 |   | genus | Porphyromonas       |
| <i>Prevotella bergensis</i> DSM 17361                                     | 3.27 | HMP  | 585502 |   | genus | Prevotella          |
| <i>Prevotella bivia</i> JCVIHMP010                                        | 2.42 | HMP  | 553171 |   | genus | Prevotella          |
| <i>Prevotella buccae</i> D17                                              | 3.36 | HMP  | 575611 |   | genus | Prevotella          |
| <i>Prevotella buccalis</i> ATCC 35310                                     | 3.03 | HMP  | 679190 |   | genus | Prevotella          |
| <i>Prevotella copri</i> DSM 18205                                         | 3.51 | HMP  | 537011 | * | genus | Prevotella          |
| <i>Prevotella melaninogenica</i> ATCC 25845                               | 3.17 | HMP  | 553174 |   | genus | Prevotella          |
| <i>Prevotella melaninogenica</i> D18                                      | 3.29 | HMP  | 575612 |   | genus | Prevotella          |
| <i>Prevotella oris</i> F0302                                              | 3.25 | HMP  | 649760 |   | genus | Prevotella          |
| <i>Prevotella ruminicola</i> 23                                           | 3.62 | NCBI | 264731 |   | genus | Prevotella          |
| <i>Prevotella</i> sp. oral taxon 299 str. F0039                           | 2.45 | HMP  | 575614 |   | genus | Prevotella          |
| <i>Prevotella</i> sp. oral taxon 317 str. F0108                           | 4.1  | HMP  | 575615 |   | genus | Prevotella          |
| <i>Prevotella</i> sp. oral taxon 472 str. F0295                           | 3.64 | HMP  | 619693 |   | genus | Prevotella          |
| <i>Prevotella tanneriae</i> ATCC 51259                                    | 2.59 | HMP  | 626522 |   | genus | Prevotella          |
| <i>Prevotella timonensis</i> CRIS 5C-B1                                   | 2.8  | HMP  | 679189 |   | genus | Prevotella          |
| <i>Prevotella veroralis</i> F0319                                         | 2.99 | HMP  | 649761 |   | genus | Prevotella          |
| <i>Prochlorococcus marinus</i> str. AS9601                                | 1.67 | NCBI | 146891 |   | genus | Cyanobacteria GpIIa |
| <i>Prochlorococcus marinus</i> str. MIT 9211                              | 1.69 | NCBI | 93059  |   | genus | Cyanobacteria GpIIa |
| <i>Prochlorococcus marinus</i> str. MIT 9215                              | 1.74 | NCBI | 93060  |   | genus | Cyanobacteria GpIIa |
| <i>Prochlorococcus marinus</i> str. MIT 9301                              | 1.64 | NCBI | 167546 |   | genus | Cyanobacteria GpIIa |
| <i>Prochlorococcus marinus</i> str. MIT 9303                              | 2.68 | NCBI | 59922  |   | genus | Cyanobacteria GpIIa |
| <i>Prochlorococcus marinus</i> str. MIT 9312                              | 1.71 | NCBI | 74546  |   | genus | Cyanobacteria GpIIa |
| <i>Prochlorococcus marinus</i> str. MIT 9313                              | 2.41 | NCBI | 74547  |   | genus | Cyanobacteria GpIIa |
| <i>Prochlorococcus marinus</i> str. MIT 9515                              | 1.7  | NCBI | 167542 |   | genus | Cyanobacteria GpIIa |
| <i>Prochlorococcus marinus</i> str. NATL1A                                | 1.86 | NCBI | 167555 |   | genus | Cyanobacteria GpIIa |
| <i>Prochlorococcus marinus</i> str. NATL2A                                | 1.84 | NCBI | 59920  |   | genus | Cyanobacteria GpIIa |
| <i>Prochlorococcus marinus</i> subsp. <i>marinus</i> str. CCMP1375        | 1.75 | NCBI | 167539 |   | genus | Cyanobacteria GpIIa |
| <i>Prochlorococcus marinus</i> subsp. <i>pastoris</i> str. CCMP1986       | 1.66 | NCBI | 59919  |   | genus | Cyanobacteria GpIIa |
| <i>Propionibacterium acnes</i> J139                                       | 2.48 | HMP  | 679194 |   | genus | Propionibacterium   |
| <i>Propionibacterium acnes</i> J165                                       | 2.5  | HMP  | 679195 |   | genus | Propionibacterium   |
| <i>Propionibacterium acnes</i> KPA171202                                  | 2.56 | NCBI | 267747 |   | genus | Propionibacterium   |
| <i>Propionibacterium acnes</i> SK137                                      | 4.99 | NCBI | 553199 |   | genus | Propionibacterium   |
| <i>Propionibacterium acnes</i> SK187                                      | 2.51 | HMP  | 686659 |   | genus | Propionibacterium   |
| <i>Propionibacterium freudenreichii</i> subsp. <i>shermanii</i> CIRM-BIA1 | 2.62 | NCBI | 754252 |   | genus | Propionibacterium   |

|                                                           |      |      |        |   |        |                   |
|-----------------------------------------------------------|------|------|--------|---|--------|-------------------|
| <i>Prosthecochloris aestuarii</i> DSM 271                 | 2.51 | NCBI | 290512 |   | family | Chlorobiaceae     |
| <i>Proteus mirabilis</i> ATCC 29906                       | 4.03 | HMP  | 525369 |   | genus  | Proteus           |
| <i>Proteus mirabilis</i> HI4320                           | 4.06 | NCBI | 529507 |   | genus  | Proteus           |
| <i>Proteus penneri</i> ATCC 35198                         | 3.75 | HMP  | 471881 | * | genus  | Proteus           |
| <i>Providencia alcalifaciens</i> DSM 30120                | 4.03 | HMP  | 520999 | * | genus  | Providencia       |
| <i>Providencia rettgeri</i> DSM 1131                      | 4.76 | HMP  | 521000 | * | genus  | Providencia       |
| <i>Providencia rustigianii</i> DSM 4541                   | 3.98 | HMP  | 500637 | * | genus  | Providencia       |
| <i>Providencia stuartii</i> ATCC 25827                    | 4.61 | HMP  | 471874 | * | genus  | Providencia       |
| <i>Pseudoalteromonas atlantica</i> T6c                    | 5.19 | NCBI | 342610 |   | genus  | Glaciecola        |
| <i>Pseudoalteromonas haloplanktis</i> TAC125              | 3.85 | NCBI | 326442 |   | genus  | Pseudoalteromonas |
| <i>Pseudomonas aeruginosa</i> LESB58                      | 6.6  | NCBI | 557722 |   | genus  | Pseudomonas       |
| <i>Pseudomonas aeruginosa</i> PA7                         | 6.59 | NCBI | 381754 |   | genus  | Pseudomonas       |
| <i>Pseudomonas aeruginosa</i> PAO1                        | 6.26 | NCBI | 208964 |   | genus  | Pseudomonas       |
| <i>Pseudomonas aeruginosa</i> UCBPP-PA14                  | 6.54 | NCBI | 208963 |   | genus  | Pseudomonas       |
| <i>Pseudomonas entomophila</i> L48                        | 5.89 | NCBI | 384676 |   | genus  | Pseudomonas       |
| <i>Pseudomonas fluorescens</i> Pf0-1                      | 6.44 | NCBI | 205922 |   | genus  | Pseudomonas       |
| <i>Pseudomonas fluorescens</i> Pf-5                       | 7.07 | NCBI | 220664 |   | genus  | Pseudomonas       |
| <i>Pseudomonas fluorescens</i> SBW25                      | 6.72 | NCBI | 216595 |   | genus  | Pseudomonas       |
| <i>Pseudomonas mendocina</i> ymp                          | 5.07 | NCBI | 399739 |   | genus  | Pseudomonas       |
| <i>Pseudomonas putida</i> F1                              | 5.96 | NCBI | 351746 |   | genus  | Pseudomonas       |
| <i>Pseudomonas putida</i> GB-1                            | 6.08 | NCBI | 76869  |   | genus  | Pseudomonas       |
| <i>Pseudomonas putida</i> KT2440                          | 6.18 | NCBI | 160488 |   | genus  | Pseudomonas       |
| <i>Pseudomonas putida</i> W619                            | 5.77 | NCBI | 390235 |   | genus  | Pseudomonas       |
| <i>Pseudomonas stutzeri</i> A1501                         | 4.57 | NCBI | 379731 |   | genus  | Pseudomonas       |
| <i>Pseudomonas syringae</i> pv. <i>phaseolicola</i> 1448A | 5.93 | NCBI | 264730 |   | genus  | Pseudomonas       |
| <i>Pseudomonas syringae</i> pv. <i>syringae</i> B728a     | 6.09 | NCBI | 205918 |   | genus  | Pseudomonas       |
| <i>Pseudomonas syringae</i> pv. <i>tomato</i> str. DC3000 | 6.4  | NCBI | 223283 |   | genus  | Pseudomonas       |
| <i>Psychrobacter arcticus</i> 273-4                       | 2.65 | NCBI | 259536 |   | genus  | Psychrobacter     |
| <i>Psychrobacter cryohalolentis</i> K5                    | 3.06 | NCBI | 335284 |   | genus  | Psychrobacter     |
| <i>Psychrobacter</i> sp. PRwf-1                           | 2.98 | NCBI | 349106 |   | genus  | Psychrobacter     |
| <i>Psychromonas ingrahamii</i> 37                         | 4.56 | NCBI | 357804 |   | genus  | Psychromonas      |
| <i>Pyramidobacter piscolens</i> W5455                     | 2.56 | HMP  | 352165 |   | genus  | Pyramidobacter    |
| <i>Pyrobaculum aerophilum</i> str. IM2                    | 2.22 | NCBI | 178306 |   | genus  | Pyrobaculum       |
| <i>Pyrobaculum arsenaticum</i> DSM 13514                  | 2.12 | NCBI | 340102 |   | genus  | Pyrobaculum       |
| <i>Pyrobaculum calidifontis</i> JCM 11548                 | 2.01 | NCBI | 410359 |   | genus  | Pyrobaculum       |
| <i>Pyrobaculum islandicum</i> DSM 4184                    | 1.83 | NCBI | 384616 |   | genus  | Pyrobaculum       |
| <i>Pyrococcus abyssi</i> GE5                              | 1.77 | NCBI | 272844 |   | genus  | Pyrococcus        |
| <i>Pyrococcus furiosus</i> DSM 3638                       | 1.91 | NCBI | 186497 |   | genus  | Pyrococcus        |
| <i>Pyrococcus horikoshii</i> OT3                          | 1.74 | NCBI | 70601  |   | genus  | Pyrococcus        |
| <i>Ralstonia eutropha</i> H16                             | 6.96 | NCBI | 381666 |   | genus  | Cupriavidus       |
| <i>Ralstonia eutropha</i> JMP134                          | 6.53 | NCBI | 264198 |   | genus  | Cupriavidus       |

|                                                            |      |      |        |  |        |                   |
|------------------------------------------------------------|------|------|--------|--|--------|-------------------|
| <i>Ralstonia pickettii</i> 12D                             | 4.97 | NCBI | 428406 |  | genus  | Ralstonia         |
| <i>Ralstonia pickettii</i> 12J                             | 5.24 | NCBI | 402626 |  | genus  | Ralstonia         |
| <i>Ralstonia solanacearum</i> GMI1000                      | 3.72 | NCBI | 267608 |  | genus  | Ralstonia         |
| <i>Ralstonia solanacearum</i> MolK2                        | 5.96 | NCBI | 564065 |  | genus  | Ralstonia         |
| <i>Renibacterium salmoninarum</i> ATCC 33209               | 3.16 | NCBI | 288705 |  | genus  | Renibacterium     |
| <i>Rhizobium etli</i> CFN 42                               | 4.38 | NCBI | 347834 |  | genus  | Rhizobium         |
| <i>Rhizobium etli</i> CIAT 652                             | 4.51 | NCBI | 491916 |  | genus  | Rhizobium         |
| <i>Rhizobium leguminosarum</i> bv. <i>trifolii</i> WSM1325 | 4.77 | NCBI | 395491 |  | genus  | Rhizobium         |
| <i>Rhizobium leguminosarum</i> bv. <i>trifolii</i> WSM2304 | 4.54 | NCBI | 395492 |  | genus  | Rhizobium         |
| <i>Rhizobium leguminosarum</i> bv. <i>viciae</i> 3841      | 5.06 | NCBI | 216596 |  | genus  | Rhizobium         |
| <i>Rhizobium</i> sp. NGR234                                | 3.93 | NCBI | 394    |  | genus  | Ensifer           |
| <i>Rhodobacter capsulatus</i> SB 1003                      | 3.74 | NCBI | 272942 |  | genus  | Rhodobacter       |
| <i>Rhodobacter sphaeroides</i> 2.4.1                       | 4.13 | NCBI | 272943 |  | genus  | Rhodobacter       |
| <i>Rhodobacter sphaeroides</i> ATCC 17025                  | 3.22 | NCBI | 349102 |  | genus  | Rhodobacter       |
| <i>Rhodobacter sphaeroides</i> ATCC 17029                  | 4.37 | NCBI | 349101 |  | genus  | Rhodobacter       |
| <i>Rhodobacter sphaeroides</i> KD131                       | 4.45 | NCBI | 557760 |  | genus  | Rhodobacter       |
| <i>Rhodococcus equi</i> ATCC 33707                         | 5.25 | HMP  | 525370 |  | genus  | Rhodococcus       |
| <i>Rhodococcus erythropolis</i> PR4                        | 6.52 | NCBI | 234621 |  | genus  | Rhodococcus       |
| <i>Rhodococcus erythropolis</i> SK121                      | 6.1  | HMP  | 596309 |  |        |                   |
| <i>Rhodococcus jostii</i> RHA1                             | 7.8  | NCBI | 101510 |  | genus  | Rhodococcus       |
| <i>Rhodococcus opacus</i> B4                               | 7.91 | NCBI | 632772 |  | genus  | Rhodococcus       |
| <i>Rhodoferax ferrireducens</i> T118                       | 4.71 | NCBI | 338969 |  | genus  | Rhodoferax        |
| <i>Rhodopirellula baltica</i> SH 1                         | 7.15 | NCBI | 243090 |  | genus  | Rhodopirellula    |
| <i>Rhodopseudomonas palustris</i> BisA53                   | 5.51 | NCBI | 316055 |  | genus  | Rhodopseudomonas  |
| <i>Rhodopseudomonas palustris</i> BisB18                   | 5.51 | NCBI | 316056 |  | genus  | Rhodopseudomonas  |
| <i>Rhodopseudomonas palustris</i> BisB5                    | 4.89 | NCBI | 316057 |  | genus  | Rhodopseudomonas  |
| <i>Rhodopseudomonas palustris</i> CGA009                   | 5.46 | NCBI | 258594 |  | family | Bradyrhizobiaceae |
| <i>Rhodopseudomonas palustris</i> HaA2                     | 5.33 | NCBI | 316058 |  | genus  | Rhodopseudomonas  |
| <i>Rhodopseudomonas palustris</i> TIE-1                    | 5.74 | NCBI | 395960 |  | family | Bradyrhizobiaceae |
| <i>Rhodospirillum centenum</i> SW                          | 4.36 | NCBI | 414684 |  | genus  | Rhodocista        |
| <i>Rhodospirillum rubrum</i> ATCC 11170                    | 4.35 | NCBI | 269796 |  | genus  | Rhodospirillum    |
| <i>Rhodothermus marinus</i> DSM 4252                       | 3.26 | NCBI | 518766 |  | genus  | Rhodothermus      |
| <i>Rickettsia africae</i> ESF-5                            | 1.28 | NCBI | 347255 |  | genus  | Rickettsia        |
| <i>Rickettsia akari</i> str. Hartford                      | 1.23 | NCBI | 293614 |  | genus  | Rickettsia        |
| <i>Rickettsia bellii</i> OSU 85-389                        | 1.53 | NCBI | 391896 |  | genus  | Rickettsia        |
| <i>Rickettsia bellii</i> RML369-C                          | 1.52 | NCBI | 336407 |  | genus  | Rickettsia        |
| <i>Rickettsia canadensis</i> str. McKiel                   | 1.16 | NCBI | 293613 |  | genus  | Rickettsia        |
| <i>Rickettsia conorii</i> str. Malish 7                    | 1.27 | NCBI | 272944 |  | genus  | Rickettsia        |
| <i>Rickettsia felis</i> URRWXCa2                           | 1.49 | NCBI | 315456 |  | genus  | Rickettsia        |

|                                                                        |      |         |        |   |        |                   |
|------------------------------------------------------------------------|------|---------|--------|---|--------|-------------------|
| <i>Rickettsia massiliae</i> MTU5                                       | 1.36 | NCBI    | 416276 |   | genus  | Rickettsia        |
| <i>Rickettsia peacockii</i> str. Rustic                                | 1.29 | NCBI    | 562019 |   | genus  | Rickettsia        |
| <i>Rickettsia prowazekii</i> str. Madrid E                             | 1.11 | NCBI    | 272947 |   | genus  | Rickettsia        |
| <i>Rickettsia rickettsii</i> str. Iowa                                 | 1.27 | NCBI    | 452659 |   | genus  | Rickettsia        |
| <i>Rickettsia rickettsii</i> str. 'Sheila Smith'                       | 1.26 | NCBI    | 392021 |   | genus  | Rickettsia        |
| <i>Rickettsia typhi</i> str. Wilmington                                | 1.11 | NCBI    | 257363 |   | genus  | Rickettsia        |
| <i>Robiginitalea biformata</i> HTCC2501                                | 3.53 | NCBI    | 313596 |   | genus  | Robiginitalea     |
| <i>Roseburia intestinalis</i> L1-82                                    | 4.41 | HMP     | 536231 | * | genus  | Roseburia         |
| <i>Roseburia intestinalis</i> M50/1                                    | 4.14 | MetaHIT | 657315 | * | genus  | Roseburia         |
| <i>Roseburia intestinalis</i> XB6B4                                    | 4.29 | MetaHIT | 718255 | * | genus  | Roseburia         |
| <i>Roseburia inulinivorans</i> DSM 16841                               | 4.05 | HMP     | 622312 | * |        |                   |
| <i>Roseiflexus castenholzii</i> DSM 13941                              | 5.72 | NCBI    | 383372 |   | genus  | Chloroflexus      |
| <i>Roseiflexus</i> sp. RS-1                                            | 5.8  | NCBI    | 357808 |   | genus  | Chloroflexus      |
| <i>Roseobacter denitrificans</i> OCh 114                               | 4.13 | NCBI    | 375451 |   | genus  | Roseobacter       |
| <i>Roseomonas cervicalis</i> ATCC 49957                                | 5.1  | HMP     | 525371 |   | genus  | Roseomonas        |
| <i>Rothia dentocariosa</i> ATCC 17931                                  | 2.49 | HMP     | 762948 |   | genus  | Rothia            |
| <i>Rothia mucilaginosa</i> ATCC 25296                                  | 2.26 | HMP     | 553201 |   | genus  | Rothia            |
| <i>Rothia mucilaginosa</i> DY-18                                       | 2.26 | NCBI    | 680646 |   | genus  | Rothia            |
| <i>Rubroacter xylanophilus</i> DSM 9941                                | 3.23 | NCBI    | 266117 |   | genus  | Rubroacter        |
| <i>Ruegeria pomeroyi</i> DSS-3                                         | 4.11 | NCBI    | 246200 |   | genus  | Silicibacter      |
| <i>Ruegeria</i> sp. TM1040                                             | 3.2  | NCBI    | 292414 |   | genus  | Ruegeria          |
| <i>Ruminococcus bromii</i> L2-63                                       | 2.25 | MetaHIT | 657321 | * | genus  | Ruminococcus      |
| <i>Ruminococcus gnavus</i> ATCC 29149                                  | 0.78 | HMP     | 411470 | * |        |                   |
| <i>Ruminococcus lactaris</i> ATCC 29176                                | 2.73 | HMP     | 471875 | * | family | Lachnospiraceae   |
| <i>Ruminococcus obeum</i> A2-162                                       | 3.76 | MetaHIT | 657314 | * | genus  | Blautia           |
| <i>Ruminococcus obeum</i> ATCC 29174                                   | 3.63 | HMP     | 411459 | * | genus  | Blautia           |
| <i>Ruminococcus</i> sp. 18P13                                          | 2.57 | MetaHIT | 213810 | * | genus  | Ruminococcus      |
| <i>Ruminococcus</i> sp. 5_1_39BFAA                                     | 3.88 | HMP     | 457412 | * | genus  | Blautia           |
| <i>Ruminococcus</i> sp. SR1/5                                          | 3.55 | MetaHIT | 657323 | * | genus  | Blautia           |
| <i>Ruminococcus torques</i> ATCC 27756                                 | 2.74 | HMP     | 411460 | * | family | Lachnospiraceae   |
| <i>Ruminococcus torques</i> L2-14                                      | 3.34 | MetaHIT | 657313 | * | family | Lachnospiraceae   |
| <i>Saccharomonospora viridis</i> DSM 43017                             | 4.31 | NCBI    | 471857 |   | genus  | Saccharomonospora |
| <i>Saccharophagus degradans</i> 2-40                                   | 5.06 | NCBI    | 203122 |   | genus  | Saccharophagus    |
| <i>Saccharopolyspora erythraea</i> NRRL 2338                           | 8.21 | NCBI    | 405948 |   | genus  | Saccharopolyspora |
| <i>Salinibacter ruber</i>                                              | 3.62 | NCBI    | 146919 |   | genus  | Salinibacter      |
| <i>Salinibacter ruber</i> DSM 13855                                    | 3.55 | NCBI    | 309807 |   | genus  | Salinibacter      |
| <i>Salinispora arenicola</i> CNS-205                                   | 5.79 | NCBI    | 391037 |   | genus  | Salinispora       |
| <i>Salinispora tropica</i> CNB-440                                     | 5.18 | NCBI    | 369723 |   | genus  | Salinispora       |
| <i>Salmonella enterica</i> subsp. <i>arizonae</i> serovar 62:z4,z23:-- | 4.6  | NCBI    | 41514  |   | genus  | Salmonella        |
| <i>Salmonella enterica</i> subsp. <i>enterica</i> serovar              | 4.8  | NCBI    | 454166 |   | genus  | Salmonella        |

|                                                                                 |      |      |        |   |        |                    |
|---------------------------------------------------------------------------------|------|------|--------|---|--------|--------------------|
| <i>Agona str. SL483</i>                                                         |      |      |        |   |        |                    |
| <i>Salmonella enterica subsp. enterica serovar Choleraesuis str. SC-B67</i>     | 4.76 | NCBI | 321314 | * | genus  | Salmonella         |
| <i>Salmonella enterica subsp. enterica serovar Dublin str. CT_02021853</i>      | 4.84 | NCBI | 439851 |   | genus  | Salmonella         |
| <i>Salmonella enterica subsp. enterica serovar Enteritidis str. P125109</i>     | 4.69 | NCBI | 550537 |   | genus  | Salmonella         |
| <i>Salmonella enterica subsp. enterica serovar Gallinarum str. 287/91</i>       | 4.66 | NCBI | 550538 |   | genus  | Salmonella         |
| <i>Salmonella enterica subsp. enterica serovar Heidelberg str. SL476</i>        | 4.89 | NCBI | 454169 |   | genus  | Salmonella         |
| <i>Salmonella enterica subsp. enterica serovar Newport str. SL254</i>           | 4.83 | NCBI | 423368 |   | genus  | Salmonella         |
| <i>Salmonella enterica subsp. enterica serovar Paratyphi A str. AKU_12601</i>   | 4.58 | NCBI | 554290 |   | genus  | Salmonella         |
| <i>Salmonella enterica subsp. enterica serovar Paratyphi A str. ATCC 9150</i>   | 4.59 | NCBI | 295319 | * | genus  | Salmonella         |
| <i>Salmonella enterica subsp. enterica serovar Paratyphi B str. SPB7</i>        | 4.86 | NCBI | 272994 |   | genus  | Salmonella         |
| <i>Salmonella enterica subsp. enterica serovar Paratyphi C strain RKS4594</i>   | 4.83 | NCBI | 476213 |   | genus  | Salmonella         |
| <i>Salmonella enterica subsp. enterica serovar Schwarzengrund str. CVM19633</i> | 4.71 | NCBI | 439843 |   | genus  | Salmonella         |
| <i>Salmonella enterica subsp. enterica serovar Typhi str. CT18</i>              | 4.81 | NCBI | 220341 | * | genus  | Salmonella         |
| <i>Salmonella enterica subsp. enterica serovar Typhi str. Ty2</i>               | 4.79 | NCBI | 209261 | * | family | Enterobacteriaceae |
| <i>Salmonella enterica subsp. enterica serovar Typhimurium str. LT2</i>         | 4.86 | NCBI | 99287  | * | genus  | Salmonella         |
| <i>Sanguibacter keddieii DSM 10542</i>                                          | 4.25 | NCBI | 446469 |   | genus  | Sanguibacter       |
| <i>Scardovia inopinata F0304</i>                                                | 1.8  | HMP  | 641146 |   | genus  | Scardovia          |
| <i>Sebaldella termitidis ATCC 33386</i>                                         | 4.42 | NCBI | 526218 |   | genus  | Sebaldella         |
| <i>Segniliparus rotundus DSM 44985</i>                                          | 3.16 | NCBI | 640132 |   | genus  | Segniliparus       |
| <i>Selenomonas flueggei ATCC 43531</i>                                          | 2.17 | HMP  | 638302 |   | genus  | Selenomonas        |
| <i>Selenomonas noxia ATCC 43541</i>                                             | 2.05 | HMP  | 585503 |   | genus  | Selenomonas        |
| <i>Selenomonas sputigena ATCC 35185</i>                                         | 2.56 | HMP  | 546271 |   | genus  | Selenomonas        |
| <i>Serratia odorifera DSM 4582</i>                                              | 5.27 | HMP  | 667129 |   | genus  | Serratia           |
| <i>Serratia proteamaculans 568</i>                                              | 5.45 | NCBI | 399741 |   | genus  | Serratia           |
| <i>Shewanella amazonensis SB2B</i>                                              | 4.31 | NCBI | 326297 |   | genus  | Shewanella         |
| <i>Shewanella baltica OS155</i>                                                 | 5.13 | NCBI | 325240 |   | genus  | Shewanella         |
| <i>Shewanella baltica OS185</i>                                                 | 5.23 | NCBI | 402882 |   | genus  | Shewanella         |
| <i>Shewanella baltica OS195</i>                                                 | 5.35 | NCBI | 399599 |   | genus  | Shewanella         |
| <i>Shewanella baltica OS223</i>                                                 | 5.15 | NCBI | 407976 |   | genus  | Shewanella         |
| <i>Shewanella denitrificans OS217</i>                                           | 4.55 | NCBI | 318161 |   | genus  | Shewanella         |
| <i>Shewanella frigidimarina NCIMB 400</i>                                       | 4.85 | NCBI | 318167 |   | genus  | Shewanella         |
| <i>Shewanella halifaxensis HAW-EB4</i>                                          | 5.23 | NCBI | 458817 |   | genus  | Shewanella         |

|                                                        |       |      |        |   |        |                      |
|--------------------------------------------------------|-------|------|--------|---|--------|----------------------|
| <i>Shewanella loihica</i> PV-4                         | 4.6   | NCBI | 323850 |   | genus  | Shewanella           |
| <i>Shewanella oneidensis</i> MR-1                      | 4.97  | NCBI | 211586 |   | genus  | Shewanella           |
| <i>Shewanella pealeana</i> ATCC 700345                 | 5.17  | NCBI | 398579 |   | genus  | Shewanella           |
| <i>Shewanella piezotolerans</i> WP3                    | 5.4   | NCBI | 225849 |   | genus  | Shewanella           |
| <i>Shewanella putrefaciens</i> CN-32                   | 4.66  | NCBI | 319224 |   | genus  | Shewanella           |
| <i>Shewanella sediminis</i> HAW-EB3                    | 5.52  | NCBI | 425104 |   | genus  | Shewanella           |
| <i>Shewanella</i> sp. ANA-3                            | 4.97  | NCBI | 94122  |   | genus  | Shewanella           |
| <i>Shewanella</i> sp. MR-4                             | 4.71  | NCBI | 60480  |   | genus  | Shewanella           |
| <i>Shewanella</i> sp. MR-7                             | 4.79  | NCBI | 60481  |   | genus  | Shewanella           |
| <i>Shewanella</i> sp. W3-18-1                          | 4.71  | NCBI | 351745 |   | genus  | Shewanella           |
| <i>Shewanella violacea</i> DSS12                       | 4.96  | NCBI | 637905 |   | genus  | Shewanella           |
| <i>Shewanella woodyi</i> ATCC 51908                    | 5.94  | NCBI | 392500 |   | genus  | Shewanella           |
| <i>Shigella boydii</i> CDC 3083-94                     | 4.62  | NCBI | 344609 |   | genus  | Escherichia/Shigella |
| <i>Shigella boydii</i> Sb227                           | 4.52  | NCBI | 300268 |   | genus  | Escherichia/Shigella |
| <i>Shigella dysenteriae</i> Sd197                      | 4.37  | NCBI | 300267 |   | genus  | Escherichia/Shigella |
| <i>Shigella flexneri</i> 2a str. 2457T                 | 4.6   | NCBI | 198215 |   | genus  | Escherichia/Shigella |
| <i>Shigella flexneri</i> 2a str. 301                   | 4.61  | NCBI | 198214 |   | genus  | Escherichia/Shigella |
| <i>Shigella flexneri</i> 5 str. 8401                   | 4.57  | NCBI | 373384 |   | genus  | Escherichia/Shigella |
| <i>Shigella sonnei</i> Ss046                           | 4.83  | NCBI | 300269 |   | genus  | Escherichia/Shigella |
| <i>Shigella</i> sp. D9                                 | 4.76  | HMP  | 556266 | * | genus  | Escherichia/Shigella |
| <i>Shuttleworthia satelles</i> DSM 14600               | 2.17  | HMP  | 626523 |   | genus  | Shuttleworthia       |
| <i>Sideroxydans lithotrophicus</i> ES-1                | 3     | NCBI | 580332 |   | family | Rhodocyclaceae       |
| <i>Simonsiella muelleri</i> ATCC 29453                 | 2.41  | HMP  | 641147 |   | genus  | Simonsiella          |
| <i>Sinorhizobium medicae</i> WSM419                    | 3.78  | NCBI | 366394 |   | genus  | Ensifer              |
| <i>Sinorhizobium meliloti</i> 1021                     | 3.65  | NCBI | 266834 |   | genus  | Ensifer              |
| <i>Slackia exigua</i> ATCC 700122                      | 2.1   | HMP  | 649764 |   | genus  | Slackia              |
| <i>Slackia heliotrinireducens</i> DSM 20476            | 3.17  | NCBI | 471855 |   | genus  | Slackia              |
| <i>Sodalis glossinidius</i> str. 'morsitans'           | 4.17  | NCBI | 343509 |   | genus  | Sodalis              |
| <i>Sorangium cellulosum</i> 'So ce 56'                 | 13.03 | NCBI | 448385 |   | genus  | Sorangium            |
| <i>Sphaerobacter thermophilus</i> DSM 20745            | 3.99  | NCBI | 479434 |   | genus  | Sphaerobacter        |
| <i>Sphingobacterium spiritivorum</i> ATCC 33300        | 5.23  | HMP  | 525372 |   | genus  | Sphingobacterium     |
| <i>Sphingobacterium spiritivorum</i> ATCC 33861        | 5.11  | HMP  | 525373 |   | genus  | Sphingobacterium     |
| <i>Sphingobium japonicum</i> UT26S                     | 4.2   | NCBI | 452662 |   | genus  | Sphingobium          |
| <i>Sphingomonas wittichii</i> RW1                      | 5.38  | NCBI | 392499 |   | genus  | Sphingomonas         |
| <i>Sphingopyxis alaskensis</i> RB2256                  | 3.35  | NCBI | 317655 |   | genus  | Sphingopyxis         |
| <i>Spirosoma linguale</i> DSM 74                       | 8.08  | NCBI | 504472 |   | genus  | Spirosoma            |
| <i>Stackebrandtia nassauensis</i> DSM 44728            | 6.84  | NCBI | 446470 |   | genus  | Stackebrandtia       |
| <i>Staphylococcus aureus</i> RF122                     | 2.74  | NCBI | 273036 |   | genus  | Staphylococcus       |
| <i>Staphylococcus aureus</i> subsp. <i>aureus</i> COL  | 2.81  | NCBI | 93062  |   | genus  | Staphylococcus       |
| <i>Staphylococcus aureus</i> subsp. <i>aureus</i> ED98 | 2.82  | NCBI | 681288 |   | genus  | Staphylococcus       |
| <i>Staphylococcus aureus</i> subsp. <i>aureus</i> JH1  | 2.91  | NCBI | 359787 |   | genus  | Staphylococcus       |

|                                                                            |      |      |        |  |       |                  |
|----------------------------------------------------------------------------|------|------|--------|--|-------|------------------|
| <i>Staphylococcus aureus</i> subsp. <i>aureus</i> JH9                      | 2.91 | NCBI | 359786 |  | genus | Staphylococcus   |
| <i>Staphylococcus aureus</i> subsp. <i>aureus</i> MN8                      | 2.87 | HMP  | 548470 |  | genus | Staphylococcus   |
| <i>Staphylococcus aureus</i> subsp. <i>aureus</i> MRSA252                  | 2.9  | NCBI | 282458 |  | genus | Staphylococcus   |
| <i>Staphylococcus aureus</i> subsp. <i>aureus</i> MSSA476                  | 2.8  | NCBI | 282459 |  | genus | Staphylococcus   |
| <i>Staphylococcus aureus</i> subsp. <i>aureus</i> Mu3                      | 2.88 | NCBI | 418127 |  | genus | Staphylococcus   |
| <i>Staphylococcus aureus</i> subsp. <i>aureus</i> Mu50                     | 2.88 | NCBI | 158878 |  | genus | Staphylococcus   |
| <i>Staphylococcus aureus</i> subsp. <i>aureus</i> MW2                      | 2.82 | NCBI | 196620 |  | genus | Staphylococcus   |
| <i>Staphylococcus aureus</i> subsp. <i>aureus</i> N315                     | 2.81 | NCBI | 158879 |  | genus | Staphylococcus   |
| <i>Staphylococcus aureus</i> subsp. <i>aureus</i> NCTC 8325                | 2.82 | NCBI | 93061  |  | genus | Staphylococcus   |
| <i>Staphylococcus aureus</i> subsp. <i>aureus</i> str. Newman              | 2.88 | NCBI | 426430 |  | genus | Staphylococcus   |
| <i>Staphylococcus aureus</i> subsp. <i>aureus</i> TCH130                   | 2.78 | HMP  | 548474 |  | genus | Staphylococcus   |
| <i>Staphylococcus aureus</i> subsp. <i>aureus</i> TCH60                    | 2.8  | HMP  | 548473 |  | genus | Staphylococcus   |
| <i>Staphylococcus aureus</i> subsp. <i>aureus</i> TCH70                    | 2.85 | HMP  | 548475 |  | genus | Staphylococcus   |
| <i>Staphylococcus aureus</i> subsp. <i>aureus</i> USA300_FPR3757           | 2.87 | NCBI | 451515 |  | genus | Staphylococcus   |
| <i>Staphylococcus aureus</i> subsp. <i>aureus</i> USA300_TCH1516           | 2.87 | NCBI | 451516 |  | genus | Staphylococcus   |
| <i>Staphylococcus capitis</i> SK14                                         | 2.44 | HMP  | 553212 |  | genus | Staphylococcus   |
| <i>Staphylococcus carnosus</i> subsp. <i>carnosus</i> TM300                | 2.57 | NCBI | 396513 |  | genus | Staphylococcus   |
| <i>Staphylococcus epidermidis</i> ATCC 12228                               | 2.5  | NCBI | 176280 |  | genus | Staphylococcus   |
| <i>Staphylococcus epidermidis</i> BCM-HMP0060                              | 2.61 | HMP  | 525374 |  | genus | Staphylococcus   |
| <i>Staphylococcus epidermidis</i> M23864:W1                                | 2.63 | HMP  | 525378 |  | genus | Staphylococcus   |
| <i>Staphylococcus epidermidis</i> M23864:W2(grey)                          | 2.52 | HMP  | 525375 |  | genus | Staphylococcus   |
| <i>Staphylococcus epidermidis</i> RP62A                                    | 2.62 | NCBI | 176279 |  | genus | Staphylococcus   |
| <i>Staphylococcus epidermidis</i> SK135                                    | 2.48 | HMP  | 596317 |  | genus | Staphylococcus   |
| <i>Staphylococcus epidermidis</i> W23144                                   | 2.65 | HMP  | 525376 |  | genus | Staphylococcus   |
| <i>Staphylococcus haemolyticus</i> JCSC1435                                | 2.69 | NCBI | 279808 |  | genus | Staphylococcus   |
| <i>Staphylococcus hominis</i> SK119                                        | 2.23 | HMP  | 629742 |  | genus | Staphylococcus   |
| <i>Staphylococcus lugdunensis</i> HKU09-01                                 | 2.66 | NCBI | 698737 |  | genus | Staphylococcus   |
| <i>Staphylococcus saprophyticus</i> subsp. <i>saprophyticus</i> ATCC 15305 | 2.52 | NCBI | 342451 |  | genus | Staphylococcus   |
| <i>Staphylococcus warneri</i> L37603                                       | 2.43 | HMP  | 596319 |  | genus | Staphylococcus   |
| <i>Staphylothermus hellenicus</i> DSM 12710                                | 1.58 | NCBI | 591019 |  | genus | Staphylothermus  |
| <i>Staphylothermus marinus</i> F1                                          | 1.57 | NCBI | 399550 |  | genus | Staphylothermus  |
| <i>Starkeya novella</i> DSM 506                                            | 4.77 | NCBI | 639283 |  | genus | Starkeya         |
| <i>Stenotrophomonas maltophilia</i> K279a                                  | 4.85 | NCBI | 522373 |  | genus | Stenotrophomonas |
| <i>Stenotrophomonas maltophilia</i> R551-3                                 | 4.57 | NCBI | 391008 |  | genus | Stenotrophomonas |
| <i>Streptobacillus moniliformis</i> DSM 12112                              | 1.66 | NCBI | 519441 |  | genus | Streptobacillus  |
| <i>Streptococcus agalactiae</i> 2603V/R                                    | 2.16 | NCBI | 208435 |  | genus | Streptococcus    |

|                                                                         |      |      |        |   |       |               |
|-------------------------------------------------------------------------|------|------|--------|---|-------|---------------|
| <i>Streptococcus agalactiae</i> A909                                    | 2.13 | NCBI | 205921 |   | genus | Streptococcus |
| <i>Streptococcus agalactiae</i> NEM316                                  | 2.21 | NCBI | 211110 |   | genus | Streptococcus |
| <i>Streptococcus dysgalactiae</i> subsp. <i>equisimilis</i> GGS_124     | 2.11 | NCBI | 486410 |   | genus | Streptococcus |
| <i>Streptococcus equi</i> subsp. <i>equi</i> 4047                       | 2.25 | NCBI | 553482 |   | genus | Streptococcus |
| <i>Streptococcus equi</i> subsp. <i>zooepidemicus</i>                   | 2.15 | NCBI | 40041  |   | genus | Streptococcus |
| <i>Streptococcus equi</i> subsp. <i>zooepidemicus</i> MGCS10565         | 2.02 | NCBI | 552526 |   | genus | Streptococcus |
| <i>Streptococcus gallolyticus</i> UCN34                                 | 2.35 | NCBI | 637909 |   | genus | Streptococcus |
| <i>Streptococcus gordonii</i> str. <i>Challis</i> substr. <i>CH1</i>    | 2.2  | NCBI | 467705 |   | genus | Streptococcus |
| <i>Streptococcus infantarius</i> subsp. <i>infantarius</i> ATCC BAA-102 | 1.93 | HMP  | 471872 | * | genus | Streptococcus |
| <i>Streptococcus mitis</i> B6                                           | 2.15 | NCBI | 365659 |   | genus | Streptococcus |
| <i>Streptococcus mutans</i> NN2025                                      | 2.01 | NCBI | 511691 |   | genus | Streptococcus |
| <i>Streptococcus mutans</i> UA159                                       | 2.03 | NCBI | 210007 |   | genus | Streptococcus |
| <i>Streptococcus oralis</i> ATCC 35037                                  | 1.91 | HMP  | 655813 |   | genus | Streptococcus |
| <i>Streptococcus parasanguinis</i> ATCC 15912                           | 2.16 | HMP  | 760570 |   | genus | Streptococcus |
| <i>Streptococcus pneumoniae</i> 70585                                   | 2.18 | NCBI | 488221 |   | genus | Streptococcus |
| <i>Streptococcus pneumoniae</i> ATCC 700669                             | 2.22 | NCBI | 561276 |   | genus | Streptococcus |
| <i>Streptococcus pneumoniae</i> CGSP14                                  | 2.21 | NCBI | 516950 |   | genus | Streptococcus |
| <i>Streptococcus pneumoniae</i> D39                                     | 2.05 | NCBI | 373153 |   | genus | Streptococcus |
| <i>Streptococcus pneumoniae</i> G54                                     | 2.08 | NCBI | 512566 |   | genus | Streptococcus |
| <i>Streptococcus pneumoniae</i> Hungary19A-6                            | 2.25 | NCBI | 487214 |   | genus | Streptococcus |
| <i>Streptococcus pneumoniae</i> JJA                                     | 2.12 | NCBI | 488222 |   | genus | Streptococcus |
| <i>Streptococcus pneumoniae</i> P1031                                   | 2.11 | NCBI | 488223 |   | genus | Streptococcus |
| <i>Streptococcus pneumoniae</i> R6                                      | 2.04 | NCBI | 171101 |   | genus | Streptococcus |
| <i>Streptococcus pneumoniae</i> Taiwan19F-14                            | 2.11 | NCBI | 487213 |   | genus | Streptococcus |
| <i>Streptococcus pneumoniae</i> TCH8431/19A                             | 4.19 | NCBI | 525381 |   | genus | Streptococcus |
| <i>Streptococcus pneumoniae</i> TIGR4                                   | 2.16 | NCBI | 170187 |   | genus | Streptococcus |
| <i>Streptococcus pyogenes</i> M1 GAS                                    | 1.85 | NCBI | 160490 |   | genus | Streptococcus |
| <i>Streptococcus pyogenes</i> MGAS10270                                 | 1.93 | NCBI | 370552 |   | genus | Streptococcus |
| <i>Streptococcus pyogenes</i> MGAS10394                                 | 1.9  | NCBI | 286636 |   | genus | Streptococcus |
| <i>Streptococcus pyogenes</i> MGAS10750                                 | 1.94 | NCBI | 370554 |   | genus | Streptococcus |
| <i>Streptococcus pyogenes</i> MGAS2096                                  | 1.86 | NCBI | 370553 |   | genus | Streptococcus |
| <i>Streptococcus pyogenes</i> MGAS315                                   | 1.9  | NCBI | 198466 |   | genus | Streptococcus |
| <i>Streptococcus pyogenes</i> MGAS5005                                  | 1.84 | NCBI | 293653 |   | genus | Streptococcus |
| <i>Streptococcus pyogenes</i> MGAS6180                                  | 1.9  | NCBI | 319701 |   | genus | Streptococcus |
| <i>Streptococcus pyogenes</i> MGAS8232                                  | 1.9  | NCBI | 186103 |   | genus | Streptococcus |
| <i>Streptococcus pyogenes</i> MGAS9429                                  | 1.84 | NCBI | 370551 |   | genus | Streptococcus |
| <i>Streptococcus pyogenes</i> NZ131                                     | 1.82 | NCBI | 471876 |   | genus | Streptococcus |
| <i>Streptococcus pyogenes</i> SSI-1                                     | 1.89 | NCBI | 193567 |   | genus | Streptococcus |
| <i>Streptococcus pyogenes</i> str. <i>Manfredo</i>                      | 1.84 | NCBI | 160491 |   | genus | Streptococcus |

|                                                              |       |      |        |   |       |                      |
|--------------------------------------------------------------|-------|------|--------|---|-------|----------------------|
| <i>Streptococcus salivarius</i> SK126                        | 2.13  | HMP  | 596322 |   | genus | Streptococcus        |
| <i>Streptococcus sanguinis</i> SK36                          | 2.39  | NCBI | 388919 |   | genus | Streptococcus        |
| <i>Streptococcus</i> sp. 2_1_36FAA                           | 2.23  | HMP  | 469609 | * | genus | Streptococcus        |
| <i>Streptococcus</i> sp. M143                                | 1.88  | HMP  | 563037 |   | genus | Streptococcus        |
| <i>Streptococcus suis</i> 05ZYH33                            | 2.1   | NCBI | 391295 |   | genus | Streptococcus        |
| <i>Streptococcus suis</i> 98HAH33                            | 2.1   | NCBI | 391296 |   | genus | Streptococcus        |
| <i>Streptococcus suis</i> BM407                              | 2.15  | NCBI | 568814 |   | genus | Streptococcus        |
| <i>Streptococcus suis</i> P1/7                               | 2.01  | NCBI | 218494 |   | genus | Streptococcus        |
| <i>Streptococcus suis</i> SC84                               | 2.1   | NCBI | 568813 |   | genus | Streptococcus        |
| <i>Streptococcus thermophilus</i> CNRZ1066                   | 1.8   | NCBI | 299768 |   | genus | Streptococcus        |
| <i>Streptococcus thermophilus</i> LMD-9                      | 1.86  | NCBI | 322159 |   | genus | Streptococcus        |
| <i>Streptococcus thermophilus</i> LMG 18311                  | 1.8   | NCBI | 264199 |   | genus | Streptococcus        |
| <i>Streptococcus uberis</i> 0140J                            | 1.85  | NCBI | 218495 |   | genus | Streptococcus        |
| <i>Streptomyces avermitilis</i> MA-4680                      | 9.03  | NCBI | 227882 |   | genus | Streptomyces         |
| <i>Streptomyces coelicolor</i>                               | 8.67  | NCBI | 1902   |   | genus | Streptomyces         |
| <i>Streptomyces griseus</i> subsp. <i>griseus</i> NBRC 13350 | 8.55  | NCBI | 455632 |   | genus | Streptomyces         |
| <i>Streptomyces scabiei</i> 87.22                            | 10.15 | NCBI | 680198 |   | genus | Streptomyces         |
| <i>Streptosporangium roseum</i> DSM 43021                    | 10.34 | NCBI | 479432 |   | genus | Streptosporangium    |
| <i>Subdoligranulum variabile</i> DSM 15176                   | 3.25  | HMP  | 411471 | * | genus | Subdoligranulum      |
| <i>Sulfolobus acidocaldarius</i> DSM 639                     | 2.23  | NCBI | 330779 |   | genus | Sulfolobus           |
| <i>Sulfolobus islandicus</i> L.D.8.5                         | 2.72  | NCBI | 425944 |   | genus | Sulfolobus           |
| <i>Sulfolobus islandicus</i> L.S.2.15                        | 2.74  | NCBI | 429572 |   | genus | Sulfolobus           |
| <i>Sulfolobus islandicus</i> M.14.25                         | 2.61  | NCBI | 427317 |   | genus | Sulfolobus           |
| <i>Sulfolobus islandicus</i> M.16.27                         | 2.69  | NCBI | 427318 |   | genus | Sulfolobus           |
| <i>Sulfolobus islandicus</i> M.16.4                          | 2.59  | NCBI | 426118 |   | genus | Sulfolobus           |
| <i>Sulfolobus islandicus</i> Y.G.57.14                       | 2.7   | NCBI | 439386 |   | genus | Sulfolobus           |
| <i>Sulfolobus islandicus</i> Y.N.15.51                       | 2.81  | NCBI | 419942 |   | genus | Sulfolobus           |
| <i>Sulfolobus solfataricus</i> P2                            | 2.99  | NCBI | 273057 |   | genus | Sulfolobus           |
| <i>Sulfolobus tokodaii</i> str. 7                            | 2.69  | NCBI | 273063 |   | genus | Sulfolobus           |
| <i>Sulfurihydrogenibium azorense</i> Az-Fu1                  | 1.64  | NCBI | 204536 |   | genus | Sulfurihydrogenibium |
| <i>Sulfurihydrogenibium</i> sp. YO3AOP1                      | 1.84  | NCBI | 436114 |   | genus | Sulfurihydrogenibium |
| <i>Sulfurimonas denitrificans</i> DSM 1251                   | 2.2   | NCBI | 326298 |   | genus | Sulfurimonas         |
| <i>Sulfurospirillum deleyianum</i> DSM 6946                  | 2.31  | NCBI | 525898 |   | genus | Sulfurospirillum     |
| <i>Sulfurovum</i> sp. NBC37-1                                | 2.56  | NCBI | 387093 |   | genus | Sulfurovum           |
| <i>Symbiobacterium thermophilum</i> IAM 14863                | 3.57  | NCBI | 292459 |   | genus | Symbiobacterium      |
| <i>Synechococcus elongatus</i> PCC 6301                      | 2.7   | NCBI | 269084 |   | genus | Cyanobacteria GpIIb  |
| <i>Synechococcus elongatus</i> PCC 7942                      | 2.7   | NCBI | 1140   |   | genus | Cyanobacteria GpIIb  |
| <i>Synechococcus</i> sp. CC9311                              | 2.61  | NCBI | 64471  |   | genus | Cyanobacteria GpIIa  |
| <i>Synechococcus</i> sp. CC9605                              | 2.51  | NCBI | 110662 |   | genus | Cyanobacteria GpIIa  |
| <i>Synechococcus</i> sp. CC9902                              | 2.23  | NCBI | 316279 |   | genus | Cyanobacteria GpIIa  |

|                                                                     |      |         |        |  |       |                     |
|---------------------------------------------------------------------|------|---------|--------|--|-------|---------------------|
| <i>Synechococcus</i> sp. JA-2-3B'a(2-13)                            | 3.05 | NCBI    | 321332 |  | class | Cyanobacteria       |
| <i>Synechococcus</i> sp. JA-3-3Ab                                   | 2.93 | NCBI    | 321327 |  | class | Cyanobacteria       |
| <i>Synechococcus</i> sp. PCC 7002                                   | 3.01 | NCBI    | 32049  |  | genus | Cyanobacteria GpX   |
| <i>Synechococcus</i> sp. RCC307                                     | 2.22 | NCBI    | 316278 |  | genus | Cyanobacteria GpIIa |
| <i>Synechococcus</i> sp. WH 7803                                    | 2.37 | NCBI    | 32051  |  | genus | Cyanobacteria GpIIa |
| <i>Synechococcus</i> sp. WH 8102                                    | 2.43 | NCBI    | 84588  |  | genus | Cyanobacteria GpIIa |
| <i>Synechocystis</i> sp. PCC 6803                                   | 3.57 | NCBI    | 1148   |  | genus | Cyanobacteria GpIX  |
| <i>Synergistetes bacterium</i> SGP1                                 | 2.73 | MetaHIT | 651822 |  |       |                     |
| <i>Syntrophobacter fumaroxidans</i> MPOB                            | 4.99 | NCBI    | 335543 |  | genus | Syntrophobacter     |
| <i>Syntrophomonas wolfei</i> subsp. <i>wolfei</i> str. Goettingen   | 2.94 | NCBI    | 335541 |  | genus | Syntrophomonas      |
| <i>Syntrophothermus lipocalidus</i> DSM 12680                       | 2.41 | NCBI    | 643648 |  | genus | Syntrophothermus    |
| <i>Syntrophus aciditrophicus</i> SB                                 | 3.18 | NCBI    | 56780  |  | genus | Syntrophus          |
| <i>Teredinibacter turnerae</i> T7901                                | 5.19 | NCBI    | 377629 |  | genus | Teredinibacter      |
| <i>Thauera</i> sp. MZ1T                                             | 4.5  | NCBI    | 85643  |  | genus | Thauera             |
| <i>Thermanaerovibrio acidaminovorans</i> DSM 6589                   | 1.85 | NCBI    | 525903 |  | genus | Aminomonas          |
| <i>Thermincola</i> sp. JR                                           | 2.48 | NCBI    | 635013 |  | genus | Thermincola         |
| <i>Thermoanaerobacter italicus</i> Ab9                              | 2.45 | NCBI    | 580331 |  | genus | Thermoanaerobacter  |
| <i>Thermoanaerobacter mathranii</i> subsp. <i>mathranii</i> str. A3 | 2.31 | NCBI    | 583358 |  | genus | Thermoanaerobacter  |
| <i>Thermoanaerobacter pseudethanolicus</i> ATCC 33223               | 2.36 | NCBI    | 340099 |  | genus | Thermoanaerobacter  |
| <i>Thermoanaerobacter</i> sp. X514                                  | 2.46 | NCBI    | 399726 |  | genus | Thermoanaerobacter  |
| <i>Thermoanaerobacter tengcongensis</i> MB4                         | 2.69 | NCBI    | 273068 |  | genus | Caldanaerobacter    |
| <i>Thermobaculum terrenum</i> ATCC BAA-798                          | 3.1  | NCBI    | 525904 |  | class | Thermomicrobia      |
| <i>Thermobifida fusca</i> YX                                        | 3.64 | NCBI    | 269800 |  | genus | Thermobifida        |
| <i>Thermobispora bispora</i> DSM 43833                              | 4.19 | NCBI    | 469371 |  | genus | Thermobispora       |
| <i>Thermococcus gammatolerans</i> EJ3                               | 2.05 | NCBI    | 593117 |  | genus | Thermococcus        |
| <i>Thermococcus kodakarensis</i> KOD1                               | 2.09 | NCBI    | 69014  |  | genus | Thermococcus        |
| <i>Thermococcus onnurineus</i> NA1                                  | 1.85 | NCBI    | 523850 |  | genus | Thermococcus        |
| <i>Thermococcus sibiricus</i> MM 739                                | 1.85 | NCBI    | 604354 |  | genus | Thermococcus        |
| <i>Thermocrinis albus</i> DSM 14484                                 | 1.5  | NCBI    | 638303 |  | genus | Thermocrinis        |
| <i>Thermodesulfovibrio yellowstonii</i> DSM 11347                   | 2    | NCBI    | 289376 |  | genus | Thermodesulfovibrio |
| <i>Thermofilum pendens</i> Hrk 5                                    | 1.78 | NCBI    | 368408 |  | genus | Thermofilum         |
| <i>Thermomicrobium roseum</i> DSM 5159                              | 2    | NCBI    | 309801 |  | genus | Thermomicrobium     |
| <i>Thermomonospora curvata</i> DSM 43183                            | 5.64 | NCBI    | 471852 |  | genus | Thermomonospora     |
| <i>Thermoplasma acidophilum</i> DSM 1728                            | 1.56 | NCBI    | 273075 |  | genus | Thermoplasma        |
| <i>Thermoplasma volcanium</i> GSS1                                  | 1.58 | NCBI    | 273116 |  | genus | Thermoplasma        |
| <i>Thermoproteus neutrophilus</i> V24Sta                            | 1.77 | NCBI    | 444157 |  | genus | Pyrobaculum         |
| <i>Thermosipho africanus</i> TCF52B                                 | 2.02 | NCBI    | 484019 |  | genus | Thermosipho         |
| <i>Thermosipho melanesiensis</i> BI429                              | 1.92 | NCBI    | 391009 |  | genus | Thermosipho         |

|                                                               |      |      |        |   |        |                     |
|---------------------------------------------------------------|------|------|--------|---|--------|---------------------|
| <i>Thermosphaera aggregans</i> DSM 11486                      | 1.32 | NCBI | 633148 |   | genus  | Thermosphaera       |
| <i>Thermosynechococcus elongatus</i> BP-1                     | 2.59 | NCBI | 197221 |   | class  | Cyanobacteria       |
| <i>Thermotoga lettingae</i> TMO                               | 2.14 | NCBI | 416591 |   | genus  | Thermotoga          |
| <i>Thermotoga maritima</i> MSB8                               | 1.86 | NCBI | 243274 |   | genus  | Thermotoga          |
| <i>Thermotoga naphthophila</i> RKU-10                         | 1.81 | NCBI | 590168 |   | genus  | Thermotoga          |
| <i>Thermotoga neapolitana</i> DSM 4359                        | 1.88 | NCBI | 309803 |   | genus  | Thermotoga          |
| <i>Thermotoga petrophila</i> RKU-1                            | 1.82 | NCBI | 390874 |   | genus  | Thermotoga          |
| <i>Thermotoga</i> sp. RQ2                                     | 1.88 | NCBI | 126740 |   | genus  | Thermotoga          |
| <i>Thermus thermophilus</i> HB27                              | 1.89 | NCBI | 262724 |   | genus  | Thermus             |
| <i>Thermus thermophilus</i> HB8                               | 1.85 | NCBI | 300852 |   | genus  | Thermus             |
| <i>Thioalkalivibrio</i> sp. HL-EbGR7                          | 3.46 | NCBI | 396588 |   | genus  | Thioalkalivibrio    |
| <i>Thioalkalivibrio</i> sp. K90mix                            | 2.74 | NCBI | 396595 |   | genus  | Thioalkalivibrio    |
| <i>Thiobacillus denitrificans</i> ATCC 25259                  | 2.91 | NCBI | 292415 |   | genus  | Thiobacillus        |
| <i>Thiomicrospira crunogena</i> XCL-2                         | 2.43 | NCBI | 317025 |   | genus  | Thiomicrospira      |
| <i>Thiomonas intermedia</i> K12                               | 3.4  | NCBI | 75379  |   | genus  | Thiomonas           |
| <i>Tolomonas auensis</i> DSM 9187                             | 3.47 | NCBI | 595494 |   | genus  | Tolomonas           |
| <i>Treponema denticola</i> ATCC 35405                         | 2.84 | NCBI | 243275 |   | genus  | Treponema           |
| <i>Treponema pallidum</i> subsp. <i>pallidum</i> SS14         | 1.14 | NCBI | 455434 |   | genus  | Treponema           |
| <i>Treponema pallidum</i> subsp. <i>pallidum</i> str. Nichols | 1.14 | NCBI | 243276 |   | genus  | Treponema           |
| <i>Treponema vincentii</i> ATCC 35580                         | 2.51 | HMP  | 596324 |   | genus  | Treponema           |
| <i>Trichodesmium erythraeum</i> IMS101                        | 7.75 | NCBI | 203124 |   | genus  | Cyanobacteria GpXII |
| <i>Tropheryma whipplei</i> str. Twist                         | 0.93 | NCBI | 203267 |   | genus  | Tropheryma          |
| <i>Tropheryma whipplei</i> TW08/27                            | 0.93 | NCBI | 218496 |   | genus  | Tropheryma          |
| <i>Truepera radiovictrix</i> DSM 17093                        | 3.26 | NCBI | 649638 |   | genus  | Truepera            |
| <i>Tsakamurella paurometabola</i> DSM 20162                   | 4.38 | NCBI | 521096 |   | genus  | Tsakamurella        |
| <i>Turicibacter</i> sp. PC909                                 | 2.95 | HMP  | 702450 | * | genus  | Turicibacter        |
| uncultured methanogenic archaeon RC-I                         | 3.18 | NCBI | 351160 |   | genus  | Methanocella        |
| uncultured Termite group 1 bacterium phylotype Rs-D17         | 1.13 | NCBI | 471821 |   | domain | Bacteria            |
| <i>Ureaplasma parvum</i> serovar 3 str. ATCC 27815            | 0.75 | NCBI | 505682 |   | genus  | Ureaplasma          |
| <i>Ureaplasma parvum</i> serovar 3 str. ATCC 700970           | 0.75 | NCBI | 273119 |   | genus  | Ureaplasma          |
| <i>Ureaplasma urealyticum</i> serovar 10 str. ATCC 33699      | 0.87 | NCBI | 565575 |   | genus  | Ureaplasma          |
| <i>Variovorax paradoxus</i> S110                              | 6.75 | NCBI | 543728 |   | genus  | Variovorax          |
| <i>Veillonella dispar</i> ATCC 17748                          | 2.12 | HMP  | 546273 |   | genus  | Veillonella         |
| <i>Veillonella parvula</i> ATCC 17745                         | 2.16 | HMP  | 686660 |   | genus  | Veillonella         |
| <i>Veillonella parvula</i> DSM 2008                           | 2.13 | NCBI | 479436 |   | genus  | Veillonella         |
| <i>Veillonella</i> sp. 3_1_44                                 | 2.16 | HMP  | 457416 | * | genus  | Veillonella         |
| <i>Veillonella</i> sp. 6_1_27                                 | 2.17 | HMP  | 450749 | * | genus  | Veillonella         |
| <i>Verminephrobacter eiseniae</i> EF01-2                      | 5.57 | NCBI | 391735 |   | genus  | Verminephrobacter   |

|                                                                               |      |      |        |   |        |                    |
|-------------------------------------------------------------------------------|------|------|--------|---|--------|--------------------|
| <i>Vibrio cholerae</i> M66-2                                                  | 3.94 | NCBI | 579112 |   | genus  | Vibrio             |
| <i>Vibrio cholerae</i> MJ-1236                                                | 4.24 | NCBI | 593588 |   | genus  | Vibrio             |
| <i>Vibrio cholerae</i> O1 biovar El Tor str. N16961                           | 4.03 | NCBI | 243277 |   | genus  | Vibrio             |
| <i>Vibrio cholerae</i> O395                                                   | 4.13 | NCBI | 345073 |   | genus  | Vibrio             |
| <i>Vibrio fischeri</i> ES114                                                  | 4.23 | NCBI | 312309 |   | genus  | Aliivibrio         |
| <i>Vibrio fischeri</i> MJ11                                                   | 4.32 | NCBI | 388396 |   | genus  | Aliivibrio         |
| <i>Vibrio harveyi</i> ATCC BAA-1116                                           | 5.97 | NCBI | 338187 |   | genus  | Vibrio             |
| <i>Vibrio parahaemolyticus</i> RIMD 2210633                                   | 5.17 | NCBI | 223926 |   | genus  | Vibrio             |
| <i>Vibrio</i> sp. Ex25                                                        | 5.09 | NCBI | 150340 |   | genus  | Vibrio             |
| <i>Vibrio splendidus</i> LGP32                                                | 4.22 | NCBI | 575788 |   | genus  | Vibrio             |
| <i>Vibrio vulnificus</i> CMCP6                                                | 5.13 | NCBI | 216895 |   | genus  | Vibrio             |
| <i>Vibrio vulnificus</i> YJ016                                                | 5.21 | NCBI | 196600 |   | genus  | Vibrio             |
| <i>Waddlia chondrophila</i> WSU 86-1044                                       | 2.12 | NCBI | 716544 |   | genus  | Waddlia            |
| <i>Weissella paramesenteroides</i> ATCC 33313                                 | 1.98 | HMP  | 585506 | * | genus  | Weissella          |
| <i>Wigglesworthia glossinidia</i> endosymbiont of <i>Glossina brevipalpis</i> | 0.7  | NCBI | 36870  |   | family | Enterobacteriaceae |
| <i>Wolbachia</i> endosymbiont of <i>Culex quinquefasciatus</i> Pel            | 1.48 | NCBI | 570417 |   | genus  | Anaplasma          |
| <i>Wolbachia</i> endosymbiont of <i>Drosophila melanogaster</i>               | 1.27 | NCBI | 163164 |   | genus  | Anaplasma          |
| <i>Wolbachia</i> endosymbiont strain TRS of <i>Brugia malayi</i>              | 1.08 | NCBI | 292805 |   | genus  | Anaplasma          |
| <i>Wolbachia</i> sp. wRi                                                      | 1.45 | NCBI | 66084  |   | genus  | Anaplasma          |
| <i>Wolinella succinogenes</i> DSM 1740                                        | 2.11 | NCBI | 273121 | * | genus  | Wolinella          |
| <i>Xanthobacter autotrophicus</i> Py2                                         | 5.31 | NCBI | 78245  |   | genus  | Xanthobacter       |
| <i>Xanthomonas albilineans</i>                                                | 3.77 | NCBI | 29447  |   | genus  | Xanthomonas        |
| <i>Xanthomonas axonopodis</i> pv. <i>citri</i> str. 306                       | 5.18 | NCBI | 190486 |   | genus  | Xanthomonas        |
| <i>Xanthomonas campestris</i> pv. <i>campestris</i> str. 8004                 | 5.15 | NCBI | 314565 |   | genus  | Xanthomonas        |
| <i>Xanthomonas campestris</i> pv. <i>campestris</i> str. ATCC 33913           | 5.08 | NCBI | 190485 |   | genus  | Xanthomonas        |
| <i>Xanthomonas campestris</i> pv. <i>campestris</i> str. B100                 | 5.08 | NCBI | 509169 |   | genus  | Xanthomonas        |
| <i>Xanthomonas campestris</i> pv. <i>vesicatoria</i> str. 85-10               | 5.18 | NCBI | 316273 |   | genus  | Xanthomonas        |
| <i>Xanthomonas oryzae</i> pv. <i>oryzae</i> KACC10331                         | 4.94 | NCBI | 291331 |   | genus  | Xanthomonas        |
| <i>Xanthomonas oryzae</i> pv. <i>oryzae</i> MAFF 311018                       | 4.94 | NCBI | 342109 |   | genus  | Xanthomonas        |
| <i>Xanthomonas oryzae</i> pv. <i>oryzae</i> PXO99A                            | 5.24 | NCBI | 360094 |   | genus  | Xanthomonas        |
| <i>Xenorhabdus bovienii</i> SS-2004                                           | 4.23 | NCBI | 406818 |   | genus  | Xenorhabdus        |
| <i>Xylanimonas cellulolytica</i> DSM 15894                                    | 3.74 | NCBI | 446471 |   | genus  | Xylanimonas        |
| <i>Xylella fastidiosa</i> 9a5c                                                | 2.68 | NCBI | 160492 |   | genus  | Xylella            |
| <i>Xylella fastidiosa</i> M12                                                 | 2.48 | NCBI | 405440 |   | genus  | Xylella            |
| <i>Xylella fastidiosa</i> M23                                                 | 2.54 | NCBI | 405441 |   | genus  | Xylella            |
| <i>Xylella fastidiosa</i> Temecula1                                           | 2.52 | NCBI | 183190 |   | genus  | Xylella            |

|                                                                  |      |      |        |  |       |              |
|------------------------------------------------------------------|------|------|--------|--|-------|--------------|
| <i>Yersinia enterocolitica</i> subsp. <i>enterocolitica</i> 8081 | 4.62 | NCBI | 393305 |  | genus | Yersinia     |
| <i>Yersinia pestis</i> Angola                                    | 4.5  | NCBI | 349746 |  | genus | Yersinia     |
| <i>Yersinia pestis</i> Antiqua                                   | 4.7  | NCBI | 360102 |  | genus | Yersinia     |
| <i>Yersinia pestis</i> biovar <i>Microtus</i> str. 91001         | 4.6  | NCBI | 229193 |  | genus | Yersinia     |
| <i>Yersinia pestis</i> CO92                                      | 4.65 | NCBI | 214092 |  | genus | Yersinia     |
| <i>Yersinia pestis</i> KIM 10                                    | 4.6  | NCBI | 187410 |  | genus | Yersinia     |
| <i>Yersinia pestis</i> Nepal516                                  | 4.53 | NCBI | 377628 |  | genus | Yersinia     |
| <i>Yersinia pestis</i> Pestoides F                               | 4.52 | NCBI | 386656 |  | genus | Yersinia     |
| <i>Yersinia pestis</i> Z176003                                   | 4.55 | NCBI | 637386 |  | genus | Yersinia     |
| <i>Yersinia pseudotuberculosis</i> IP 31758                      | 4.72 | NCBI | 349747 |  | genus | Yersinia     |
| <i>Yersinia pseudotuberculosis</i> IP 32953                      | 4.74 | NCBI | 273123 |  | genus | Yersinia     |
| <i>Yersinia pseudotuberculosis</i> PB1/+                         | 4.7  | NCBI | 502801 |  | genus | Yersinia     |
| <i>Yersinia pseudotuberculosis</i> YPIII                         | 4.69 | NCBI | 502800 |  | genus | Yersinia     |
| <i>Zunongwangia profunda</i> SM-A87                              | 5.13 | NCBI | 655815 |  | genus | Zunongwangia |
| <i>Zymomonas mobilis</i> subsp. <i>mobilis</i> NCIMB 11163       | 2.12 | NCBI | 622759 |  | genus | Zymomonas    |
| <i>Zymomonas mobilis</i> subsp. <i>mobilis</i> ZM4               | 2.06 | NCBI | 264203 |  | genus | Zymomonas    |
